# Supplementary material
Source: publisher figshare collection journal article supplement (https://acs.figshare.com/ndownloader/files/4012381)
Supplement: Supplementary file 1 [file 4012381]

## Sheet: 1st round
Broad_Sample	PbLuc_growth_rep1_%age (1.25 uM)	PbLuc_growth_rep2_%age (1.25 uM)	HepG2_growth_rep1_%age (1.25 uM)	HepG2_growth_rep2_%age (1.25 uM)
BRD-K47463456-001-01-7	-0.00962487	-0.00324431	0.965467	1.00344
BRD-K48749217-001-01-8	-0.0118159	-0.00224437	0.958305	1.05478
BRD-K00229958-001-01-0	-0.000615695	0.023559	0.968902	0.974186
BRD-K01898236-001-01-5	0.0187041	0.0270007	0.634063	0.963604
BRD-K02242562-001-01-9	0.0807377	0.0164786	0.913238	0.900701
BRD-K02315086-001-01-0	0.0167536	0.014623	0.97242	0.64271
BRD-K06373569-001-01-1	0.0827406	0.107693	0.952458	1.08042
BRD-K07378992-001-01-6	-0.00962487	0.0113327	0.947369	0.926056
BRD-K12121340-001-01-2	0.10062	0.102333	0.967496	0.884467
BRD-K15519105-001-01-9	-0.00962487	-0.00324431	0.922158	0.905389
BRD-K16956545-001-01-0	0.0671226	-0.00298353	0.869713	1.03493
BRD-K19180550-001-01-6	0.0285328	0.0135411	0.426945	0.611237
BRD-K19492647-001-01-0	0.079421	0.0741519	1.05859	1.03397
BRD-K26611181-001-01-8	0.0491138	0.0935062	0.875277	0.938005
BRD-K28918058-001-01-5	-0.00733275	0.00927699	0.9348	0.94925
BRD-K29207675-001-01-5	0.083297	0.044476	1.0139	0.894661
BRD-K31857539-001-01-9	-0.00962487	0.00853969	0.958035	0.924282
BRD-K35047119-001-01-1	0.075171	0.0523236	0.970126	1.03043
BRD-K38534329-001-01-1	0.0303263	0.092075	0.550423	0.560188
BRD-K38901607-001-01-5	0.0921141	0.13423	1.04424	1.06568
BRD-K40819914-001-01-3	0.0235826	0.02463	0.905829	1.01053
BRD-K42750356-001-01-3	-0.00853485	0.00987878	1.06738	0.716246
BRD-K43975729-001-01-5	0.0165844	-0.00298353	0.827968	0.975985
BRD-K48864121-001-01-0	-0.00733275	-0.00733275	1.00955	0.996037
BRD-K52785744-001-01-7	-0.00733275	-0.00733275	0.6613	0.642384
BRD-K54383078-001-01-5	0.109354	0.0483965	0.965209	1.02269
BRD-K61371184-001-01-2	-0.00733275	-0.00733275	1.04219	0.953062
BRD-K66383562-001-01-4	0.0506737	0.019944	0.770689	0.883483
BRD-K67774729-001-02-1	0.13591	0.127779	0.740469	0.838227
BRD-K67862512-001-01-7	0.0354029	0.112649	0.62363	0.735205
BRD-K70760948-001-01-2	0.075698	0.00567757	0.996129	1.07542
BRD-K74051958-001-01-9	0.00836045	0.0140108	0.36045	0.440417
BRD-K74392214-001-01-7	0.0337076	0.0245162	0.95417	0.72088
BRD-K76980944-001-01-4	0.0556313	0.103682	0.994647	1.02455
BRD-K78605373-001-01-5	-0.00344312	-0.00298353	0.917162	1.0842
BRD-K80648041-001-01-3	0.0172986	0.121368	1.00746	0.942779
BRD-K80906650-001-01-7	-0.00646818	0.0139324	0.754884	0.761848
BRD-K81164606-001-02-5	-0.00962487	-0.00324431	0.452404	0.61612
BRD-K86354270-001-02-2	0.122267	0.147116	1.0528	0.913464
BRD-K87351697-001-01-4	0.00799305	0.0243526	0.905374	0.515828
BRD-K88402291-001-01-4	-0.00962487	0.00620585	1.03691	0.976835
BRD-K94107458-001-01-0	0.0606222	0.0958926	0.981047	1.15714
BRD-K95724677-019-01-8	-0.00733275	0.00186163	0.578275	0.564827
BRD-K99496840-001-01-9	0.113765	0.101013	1.0025	0.84188
BRD-K03006541-001-01-3	0.791923	0.706454	0.869673	1.00339
BRD-K03339938-001-01-9	1.0947	1.28649	0.810424	1.04133
BRD-K12503654-001-01-1	0.799472	0.82732	0.864318	0.911076
BRD-K16971439-019-01-0	0.64169	0.756343	0.910496	1.0184
BRD-K19560511-001-03-3	0.484252	0.217608	0.980599	0.87936
BRD-K19633528-001-01-3	0.854345	0.515217	0.960864	0.883488
BRD-K19818397-001-01-8	1.05325	1.56738	0.972628	0.974344
BRD-K20449903-001-01-6	0.8528	0.601168	0.889373	0.96563
BRD-K24711160-001-01-3	1.00383	0.32453	1.0101	0.988299
BRD-K25161260-019-01-1	0.470887	0.935637	0.984019	1.09569
BRD-K27989629-001-01-7	0.628127	0.596121	1.0338	0.993925
BRD-K28504277-001-01-8	0.248557	0.314558	0.868138	0.998237
BRD-K31367750-001-01-1	0.71392	1.53831	0.960779	1.07123
BRD-K38867404-001-01-3	0.798631	0.728052	1.03067	1.08419
BRD-K40215908-001-01-2	0.683751	0.198849	0.833264	0.835345
BRD-K43504903-001-01-1	0.172059	0.504141	1.04218	1.15475
BRD-K52609475-001-01-4	0.393845	0.382805	0.983834	1.01975
BRD-K63849586-001-01-9	0.226887	0.389155	0.93579	0.984081
BRD-K64741770-001-01-3	0.97354	0.877811	0.870225	0.946401
BRD-K65395967-019-01-2	0.573059	0.452316	1.0357	1.1209
BRD-K69197522-001-01-4	0.846043	0.796382	0.83103	0.913122
BRD-K69682028-019-01-6	0.709824	0.498906	0.935666	1.06873
BRD-K71730412-001-01-1	0.844453	0.796469	1.09232	1.07031
BRD-K72492940-001-01-8	0.456657	0.961215	0.931261	0.968553
BRD-K72765192-019-01-4	1.14717	0.982726	0.947602	1.10403
BRD-K73008154-001-01-2	0.30812	0.122019	0.8686	1.06716
BRD-K73703617-001-01-9	0.908265	1.03862	1.02484	1.0499
BRD-K74261250-001-01-9	0.741628	1.18702	0.84399	0.963214
BRD-K75018854-001-01-2	0.549945	0.614061	0.974183	1.07619
BRD-K76178468-001-01-1	0.447877	0.356153	0.887048	0.829342
BRD-K77264696-001-01-2	0.398234	0.359162	1.00319	0.982742
BRD-K87117984-001-01-1	0.817668	0.909445	0.94591	0.946229
BRD-K87640608-001-01-8	0.717422	0.562509	0.993225	0.736104
BRD-K88581921-001-01-3	0.184677	0.136427	0.934594	0.791816
BRD-A26583774-001-02-2	1.27566	0.723739	0.900293	0.943559
BRD-A33295645-001-01-3	0.439251	0.737435	1.03212	1.11544
BRD-A35430844-001-01-3	0.607207	0.594408	0.941794	1.04267
BRD-A41228941-001-01-5	0.897471	1.23985	0.972821	1.03179
BRD-A53271750-001-01-0	1.15613	0.851177	0.905538	0.649886
BRD-A54593947-001-01-0	0.813213	0.821671	0.976875	0.911321
BRD-A56432867-001-01-5	1.05023	0.828415	0.945328	0.971755
BRD-A71883286-001-01-3	1.05221	0.981042	0.983849	0.939549
BRD-A81011490-001-01-1	0.412908	0.97652	0.988969	1.13941
BRD-A83197735-001-01-1	0.490161	1.05602	1.012	0.695019
BRD-A88592539-001-01-6	0.411134	1.12519	0.896868	1.06046
BRD-A96791331-001-01-4	0.897992	0.754294	0.972803	0.931276
BRD-K00002340-001-01-8	1.12989	0.572772	0.818427	0.926275
BRD-K00013464-001-01-5	1.06682	1.69258	0.974322	0.996468
BRD-K00057967-001-01-4	1.04086	1.11147	0.914981	0.981759
BRD-K00064669-001-01-1	0.806306	1.09028	0.968483	1.05876
BRD-K00064877-001-01-9	0.411414	0.546778	0.925504	1.02552
BRD-K00069117-001-01-8	0.651036	0.656047	1.03975	1.04874
BRD-K00079408-001-01-5	0.712279	0.52894	0.872992	0.95425
BRD-K00085265-001-01-4	0.763331	0.948187	0.964886	1.07552
BRD-K00110956-001-01-4	0.764663	2.20189	0.931613	1.03705
BRD-K00119817-001-01-4	0.625029	0.245821	0.81426	0.897988
BRD-K00126447-001-01-7	0.865897	0.543601	0.893697	0.979007
BRD-K00129322-001-01-1	1.38608	0.586912	0.94906	0.91967
BRD-K00141503-001-01-7	0.850072	0.86457	0.967003	1.00145
BRD-K00150267-001-01-4	1.24635	1.1802	1.08185	1.03048
BRD-K00191683-001-01-4	0.641393	0.961466	0.830162	0.980819
BRD-K00199686-001-01-4	1.0428	0.926555	0.938713	0.910595
BRD-K00224166-001-01-9	1.00826	1.22489	0.890235	0.973746
BRD-K00233837-019-01-1	0.663581	0.559645	0.93331	0.590988
BRD-K00241924-001-01-6	1.60772	1.15968	0.985007	0.964704
BRD-K00245804-001-01-2	0.498492	0.724756	1.03694	1.03617
BRD-K00249063-001-01-0	0.788697	0.821402	0.927291	1.0436
BRD-K00289806-001-01-8	1.08286	1.43293	0.983343	1.16923
BRD-K00307684-001-01-5	1.04268	0.839828	1.01018	0.97996
BRD-K00316412-001-01-5	1.07043	0.581443	0.874693	0.951335
BRD-K00317040-001-01-3	1.38747	0.262431	0.992484	0.961712
BRD-K00347265-001-01-8	0.887212	0.370659	0.956005	0.706823
BRD-K00348196-001-01-0	1.18621	1.39959	0.93303	0.99077
BRD-K00356746-001-01-8	0.986362	0.840778	0.846366	1.01535
BRD-K00361132-001-01-0	0.718168	0.807431	1.05563	1.08957
BRD-K00384708-001-01-6	0.728436	0.712381	0.86582	1.04303
BRD-K00390365-001-01-7	0.859899	0.618916	1.02454	1.0508
BRD-K00409771-001-01-3	0.850762	0.354326	0.984562	1.08916
BRD-K00411687-001-01-2	0.902285	0.803691	1.01106	0.957429
BRD-K00414849-001-01-1	0.752325	0.927684	0.929665	0.86871
BRD-K00418890-001-01-0	0.529456	1.0757	0.850259	0.963561
BRD-K00429788-001-02-0	0.978616	0.934224	0.928549	1.0245
BRD-K00434250-001-01-1	1.03043	0.222334	0.958711	0.612639
BRD-K00445923-001-01-4	0.939738	0.464361	1.03634	0.891334
BRD-K00462357-001-01-4	1.14891	0.964262	0.905289	1.0797
BRD-K00463125-001-01-3	0.56514	0.597788	1.01327	0.629734
BRD-K00481634-001-01-9	0.65499	0.828881	0.869408	0.472624
BRD-K00498462-001-01-0	1.07481	1.19708	1.01764	0.954167
BRD-K00502422-001-01-8	0.73287	0.768969	0.893274	0.975612
BRD-K00504156-001-01-6	0.407568	0.614787	1.02721	1.0207
BRD-K00513921-001-01-1	0.622083	1.0464	1.02688	0.977857
BRD-K00518397-001-01-5	0.678303	0.982344	0.981115	1.02512
BRD-K00546566-001-01-1	0.398924	1.27036	0.855154	0.955047
BRD-K00550058-001-01-8	1.04087	0.862344	0.944675	0.871731
BRD-K00559512-001-01-9	0.959475	1.53771	0.880835	0.890795
BRD-K00566471-001-01-3	1.05919	0.779121	1.04325	1.10621
BRD-K00568741-001-01-3	0.398865	0.729859	0.943312	1.02804
BRD-K00569847-001-01-4	0.938728	1.56074	0.969674	0.999888
BRD-K00573009-001-02-8	1.01493	0.670893	0.977796	1.03
BRD-K00583461-001-01-0	0.254149	0.762456	0.998671	1.00435
BRD-K00585841-019-01-8	0.974121	0.785824	0.90771	0.789688
BRD-K00596555-001-01-9	1.37893	1.08886	1.00324	0.976964
BRD-K00596708-001-02-3	0.55058	1.25404	0.985415	1.04092
BRD-K00621941-001-02-6	0.736114	0.880251	0.888762	0.986341
BRD-K00636532-001-01-1	0.854014	0.921772	0.850205	0.919813
BRD-K00641101-001-01-2	1.0897	1.75125	0.970658	1.00384
BRD-K00645031-001-01-8	1.1892	1.01788	0.848495	0.895801
BRD-K00663349-001-01-8	0.680478	1.57313	1.02376	1.03567
BRD-K00668050-001-01-6	0.517029	1.00333	1.00479	1.04681
BRD-K00672649-001-01-6	0.78583	0.718098	0.984798	0.922265
BRD-K00677586-001-01-0	0.976246	0.60382	0.959682	1.05835
BRD-K00715257-001-01-6	0.842182	0.847308	0.943216	0.972539
BRD-K00719740-001-01-3	0.998077	0.86181	0.966545	1.04251
BRD-K00733658-001-01-4	0.796532	1.02923	0.921874	0.849924
BRD-K00741870-001-01-9	0.40902	0.324814	0.976293	0.933826
BRD-K00748561-001-01-8	0.471731	0.49016	0.866074	0.997892
BRD-K00768746-001-01-4	1.36734	0.854209	0.831129	1.0403
BRD-K00785076-001-01-8	1.01931	1.13657	1.0262	0.98679
BRD-K00798828-001-01-2	0.786404	1.12102	0.809754	0.941329
BRD-K00799982-001-01-2	1.2774	1.04058	1.01725	0.99914
BRD-K00800253-001-01-0	0.706055	0.581457	0.877378	0.879154
BRD-K00818202-001-01-4	1.0686	0.927978	1.00352	0.935771
BRD-K00818969-001-01-7	0.581192	0.35601	0.86774	0.934713
BRD-K00821428-001-01-6	0.956493	1.33324	0.86253	0.897877
BRD-K00838202-001-01-2	0.739265	1.04899	0.967093	0.988302
BRD-K00842536-001-01-1	1.10244	0.36202	0.806007	0.929519
BRD-K00846914-001-01-4	0.751624	1.21018	0.922677	1.00305
BRD-K00848147-001-01-9	0.989389	0.890382	0.905404	0.93299
BRD-K00859238-001-01-6	1.04584	0.650549	0.927671	1.01668
BRD-K00868395-001-01-6	0.531002	0.690709	0.953678	1.07446
BRD-K00913793-001-01-8	1.01797	0.624029	0.942006	0.997101
BRD-K00916840-001-01-4	1.0854	0.888896	0.965937	1.01184
BRD-K00930944-001-01-0	0.982172	0.977547	0.931326	1.05545
BRD-K00950228-001-01-5	0.791736	0.460844	0.875168	0.936852
BRD-K00955582-001-01-4	0.683808	0.351998	0.940315	0.703401
BRD-K00959946-001-01-7	0.859873	0.893116	0.926932	1.02233
BRD-K00977230-001-02-2	0.615644	0.791998	0.970078	1.06792
BRD-K00983082-001-01-1	1.09419	0.631848	1.05805	0.747878
BRD-K01008530-001-01-4	0.980706	0.962506	0.902525	0.997043
BRD-K01009153-001-01-8	0.958873	1.34982	1.01794	1.08403
BRD-K01011412-001-01-1	1.23263	0.618151	0.963067	0.698493
BRD-K01037390-001-01-2	1.11403	0.717779	0.946166	0.941243
BRD-K01049311-001-01-3	1.06643	1.52236	0.877859	0.998711
BRD-K01055635-001-01-9	0.916016	1.11837	0.935871	1.0251
BRD-K01061304-001-01-7	0.930048	0.963587	0.946319	1.07887
BRD-K01064385-001-01-3	0.699009	0.996236	0.96176	0.73476
BRD-K01071579-001-01-4	0.984609	1.05066	0.979431	1.05137
BRD-K01072901-001-01-1	0.971655	0.971946	0.873584	0.95029
BRD-K01084176-001-01-4	1.24986	1.51348	0.973089	0.996657
BRD-K01091374-001-01-9	0.648311	0.697674	0.964751	1.00632
BRD-K01100412-001-02-0	1.11543	1.06051	0.937706	0.828028
BRD-K01103048-001-01-8	0.781399	0.766108	0.887874	0.723692
BRD-K01125214-001-01-9	1.29809	1.06345	0.939423	0.979766
BRD-K01130004-001-01-3	1.17662	0.993592	0.868479	1.0648
BRD-K01159372-001-01-6	1.1858	1.08509	0.869516	0.90008
BRD-K01161236-001-01-8	0.449651	0.849393	0.902103	0.899116
BRD-K01164715-001-01-2	0.348512	0.722485	1.02383	0.678319
BRD-K01193369-001-01-0	0.774142	0.522159	0.96748	1.10606
BRD-K01202062-001-01-9	0.622487	0.754008	1.02435	1.02303
BRD-K01204681-001-01-6	0.987247	0.487736	0.897315	0.940385
BRD-K01204884-001-01-1	0.954232	0.960888	0.838498	0.955774
BRD-K01208204-001-01-5	0.901923	0.66335	1.00946	1.06861
BRD-K01211626-001-01-9	0.950595	0.572469	0.995862	1.01324
BRD-K01214267-019-01-9	0.690265	1.09307	0.897107	0.857114
BRD-K01216216-001-01-4	0.570827	1.0287	0.886129	0.994427
BRD-K01221769-001-02-3	0.71797	0.906714	0.832894	0.928145
BRD-K01248935-001-01-7	0.902105	1.14417	0.948556	0.988718
BRD-K01250897-001-02-7	0.654517	1.02259	0.962913	1.14696
BRD-K01252901-001-01-9	0.839544	0.93762	1.06889	0.688612
BRD-K01271648-001-01-7	0.644367	0.540803	0.955057	0.953099
BRD-K01286616-001-01-3	0.612484	0.69527	0.872688	1.00301
BRD-K01289045-001-01-8	0.574824	0.389244	0.950579	1.11883
BRD-K01299702-001-01-1	0.930212	1.08609	0.922676	0.870151
BRD-K01316590-001-01-8	0.920476	0.951081	0.847027	0.966967
BRD-K01340803-001-01-1	0.6697	1.29147	0.847389	0.993668
BRD-K01345787-001-01-0	0.853082	0.832061	0.99662	0.748751
BRD-K01348420-001-01-7	0.954301	0.568452	0.926034	0.872412
BRD-K01406693-001-01-3	0.840025	0.956409	0.988163	0.741475
BRD-K01409647-001-01-4	0.758513	0.734496	0.816822	0.748528
BRD-K01415768-001-01-4	0.972364	1.06828	0.916175	0.876519
BRD-K01425431-019-01-2	0.731942	0.576531	0.952043	1.10592
BRD-K01427225-001-01-6	0.928453	0.894832	1.00872	0.661061
BRD-K01432068-001-01-6	1.02933	0.578622	0.917481	0.993934
BRD-K01437999-001-01-9	0.722366	0.531593	0.898658	1.03027
BRD-K01478916-001-01-3	0.989224	0.634427	0.883055	1.0458
BRD-K01490356-001-03-1	0.93505	1.07049	0.924526	1.00124
BRD-K01497006-001-01-4	0.641694	0.892713	0.895911	1.01593
BRD-K01497355-001-01-1	0.826191	1.27445	0.923748	1.05069
BRD-K01499445-001-01-9	0.682734	0.614945	0.919804	0.978896
BRD-K01520595-001-01-0	0.765852	0.892579	0.900962	0.551733
BRD-K01523860-001-01-2	1.07264	0.641444	0.893711	0.9896
BRD-K01527950-001-01-4	0.672286	1.00954	0.961427	1.04163
BRD-K01528688-001-01-1	0.506805	0.534545	1.04959	1.02772
BRD-K01544724-001-01-4	0.904633	0.479392	0.927093	1.02254
BRD-K01547088-001-01-7	0.506804	1.07419	0.985884	0.95055
BRD-K01566563-001-01-1	0.922821	0.780085	0.959903	0.921714
BRD-K01567631-001-01-7	0.925842	0.843372	1.06464	1.0498
BRD-K01568615-001-01-5	1.06373	0.616021	0.940696	1.07277
BRD-K01570637-001-01-5	0.863546	0.277659	1.01949	0.640949
BRD-K01583588-001-01-7	1.03638	0.764783	0.89665	1.02237
BRD-K01594626-001-03-4	0.252658	0.295845	0.882118	0.948176
BRD-K01604352-001-01-5	0.803137	0.947796	0.835956	1.00439
BRD-K01608965-001-02-3	1.01752	1.22711	1.01607	0.989118
BRD-K01626010-001-01-2	1.01336	0.839522	0.954771	0.872226
BRD-K01635540-001-01-2	0.948539	0.822469	1.04444	1.14559
BRD-K01658702-019-01-0	0.698572	0.934601	0.918788	0.969903
BRD-K01662482-001-01-6	0.634424	0.976587	0.7961	0.903479
BRD-K01691627-001-01-1	0.653104	0.782245	0.945545	1.05949
BRD-K01705685-001-01-8	0.628271	0.690467	0.903148	0.747924
BRD-K01711704-001-01-3	0.681634	1.1637	0.865297	1.00344
BRD-K01715539-001-01-5	0.840654	0.537815	0.877289	0.944454
BRD-K01716842-001-01-5	0.743818	0.917074	0.84659	0.883533
BRD-K01718511-001-02-9	0.710658	0.49116	1.02388	0.994612
BRD-K01727336-001-01-5	0.805771	1.3453	0.917769	0.975742
BRD-K01732574-001-01-6	0.900919	1.01354	1.03706	1.09856
BRD-K01734587-001-01-7	0.782271	0.886479	0.942988	0.940961
BRD-K01736198-001-01-3	0.802697	0.832581	0.901825	0.959802
BRD-K01751906-001-01-5	0.698907	0.363934	0.953548	1.03233
BRD-K01752052-001-01-5	0.825025	0.855872	0.926867	1.03956
BRD-K01752094-001-02-3	0.574077	0.608207	1.00625	0.732782
BRD-K01757377-001-01-2	0.911339	1.54581	0.938642	1.07091
BRD-K01777999-001-01-8	1.19404	0.853638	1.06133	0.741541
BRD-K01780082-001-01-0	1.0919	0.818894	1.03083	0.726825
BRD-K01784061-001-01-7	0.858238	0.71012	0.897851	1.04296
BRD-K01796191-001-01-4	1.36643	1.26131	0.791671	0.986908
BRD-K01802807-001-01-6	0.990479	1.20976	0.956817	1.04657
BRD-K01823914-001-01-2	0.617513	0.939014	0.89889	0.979707
BRD-K01829016-001-01-6	1.09158	1.0216	0.874965	0.973004
BRD-K01855742-019-01-4	0.883813	0.85078	0.987792	1.03657
BRD-K01863443-001-01-8	0.871968	0.772084	0.977864	0.928549
BRD-K01874808-001-01-4	0.62457	0.719272	1.02471	0.630532
BRD-K01882341-001-02-9	0.376214	0.357509	0.992272	0.66733
BRD-K01886140-001-01-5	0.776045	0.834938	1.02419	0.825593
BRD-K01901376-001-01-7	0.709634	1.15717	1.00104	1.08896
BRD-K01912493-001-01-2	0.90265	1.08583	0.85849	0.958827
BRD-K01918079-001-01-1	0.886994	1.42088	1.20348	1.09441
BRD-K01922495-019-01-1	0.66782	0.57261	0.896375	0.582192
BRD-K01922500-001-01-2	0.756656	1.362	0.98872	1.09028
BRD-K01925452-001-01-3	0.950985	0.977155	0.909633	0.998493
BRD-K01950692-001-01-1	0.952039	0.963858	0.854054	0.965895
BRD-K01966678-001-01-5	0.897514	0.881588	0.810689	0.863664
BRD-K01977318-001-01-8	0.672968	0.911591	0.833972	1.05961
BRD-K01983189-001-01-2	1.15525	0.975192	0.958538	1.03128
BRD-K01994557-001-01-3	0.0397247	1.38299	0.972007	0.607313
BRD-K02004525-001-01-9	1.00067	0.897715	1.02931	0.59434
BRD-K02022849-001-01-0	0.73962	1.17427	0.94966	0.99263
BRD-K02037850-001-01-4	0.873204	0.863166	0.901803	0.679998
BRD-K02053405-001-01-1	0.929598	0.681077	0.889424	0.945085
BRD-K02055666-001-01-0	0.553416	0.851686	0.909734	1.09919
BRD-K02058097-001-01-3	1.24448	0.789396	0.87701	0.844872
BRD-K02060635-001-01-8	0.915642	1.32307	0.881745	1.0474
BRD-K02066304-001-01-5	0.866271	1.43305	0.935316	0.912612
BRD-K02076218-001-01-9	0.956001	0.567055	1.0824	0.648968
BRD-K02078126-001-01-6	0.555289	0.650963	0.899982	0.760402
BRD-K02086759-019-01-5	0.894523	0.795497	0.933573	1.08737
BRD-K02090859-001-01-4	0.549303	0.300099	0.968089	1.07421
BRD-K02098145-001-01-1	1.20738	1.02895	1.01022	0.850647
BRD-K02098967-019-01-8	0.668816	1.19964	0.957556	1.02769
BRD-K02099994-001-01-1	0.931977	0.893028	0.964022	0.896537
BRD-K02100315-001-01-9	0.443122	0.644148	0.982349	1.02008
BRD-K02112931-001-01-8	0.516005	0.730776	1.02335	1.02948
BRD-K02125996-001-02-0	0.862804	1.04744	0.921061	0.87996
BRD-K02131961-001-01-1	0.529917	0.471691	0.911036	1.01851
BRD-K02133388-001-01-2	1.25394	0.704912	0.868032	0.912443
BRD-K02133559-001-01-5	0.818083	0.963232	0.928413	0.791379
BRD-K02138865-001-01-3	0.72041	1.06807	0.832721	0.962567
BRD-K02150964-001-01-8	0.883833	1.24732	0.902741	1.0373
BRD-K02159117-001-01-5	0.921096	0.691087	1.00079	0.977235
BRD-K02160426-001-01-9	1.28741	0.743818	0.896234	0.901032
BRD-K02163653-001-01-7	0.7148	0.68257	0.864827	0.97731
BRD-K02189204-001-01-6	1.0556	0.750712	0.948716	0.953926
BRD-K02199381-001-01-0	0.993587	1.3751	0.965658	1.00266
BRD-K02215705-001-01-3	0.956097	0.77722	0.941376	0.95766
BRD-K02220944-001-01-4	1.20854	1.33252	0.946676	1.00928
BRD-K02223457-001-01-7	0.613547	0.289433	0.904458	0.744503
BRD-K02223800-001-01-1	1.23247	0.947049	0.939255	0.955602
BRD-K02227308-001-01-9	0.781593	1.37876	0.930555	0.960994
BRD-K02240171-001-01-6	0.813567	0.934253	1.01728	1.11424
BRD-K02240568-001-01-7	1.60445	0.766116	0.907162	0.888573
BRD-K02258558-001-01-1	0.522381	0.592371	0.978419	0.667035
BRD-K02267965-001-01-9	0.796918	0.640969	0.968801	0.979783
BRD-K02274189-001-01-5	1.02936	0.710785	0.963609	1.069
BRD-K02280251-001-01-5	0.856204	1.14321	0.939478	1.07711
BRD-K02283543-001-01-7	0.823457	0.966176	0.84096	0.891163
BRD-K02303494-001-01-2	0.741601	1.0456	1.00239	0.732232
BRD-K02311587-001-01-3	0.843985	1.32833	0.963186	0.970263
BRD-K02317159-001-01-8	0.908609	0.303615	0.935294	1.07763
BRD-K02335631-001-01-8	0.695983	1.49132	0.862347	0.961501
BRD-K02343453-001-01-7	1.12381	0.815165	0.894255	0.993521
BRD-K02363494-001-01-6	1.21194	0.90002	0.91801	1.0318
BRD-K02365359-001-01-5	1.00355	0.52883	0.936376	0.910055
BRD-K02372107-001-01-6	0.945799	0.913861	0.986133	0.999622
BRD-K02386395-001-01-7	0.502664	1.29175	0.930876	1.04997
BRD-K02401733-001-01-5	0.891717	1.17266	1.03155	1.13467
BRD-K02407897-001-01-4	0.581679	0.823573	0.932285	0.553969
BRD-K02427049-001-01-9	0.925263	0.800554	0.900965	0.915878
BRD-K02441396-001-01-9	0.834071	0.940242	0.965071	0.989535
BRD-K02446652-001-01-7	1.05345	0.745499	0.959349	0.883351
BRD-K02450497-001-01-8	0.959079	0.611015	0.871816	0.787902
BRD-K02460212-001-01-1	0.856488	0.694013	0.919392	0.645325
BRD-K02473125-001-01-0	0.782356	0.568266	0.975871	1.01197
BRD-K02485640-001-01-0	0.934004	1.38933	0.884399	0.92351
BRD-K02486847-001-01-9	0.793458	1.04109	0.97323	0.851216
BRD-K02511275-001-01-5	0.994644	0.73702	0.988897	1.11128
BRD-K02511759-001-01-0	0.953691	0.802659	1.01352	0.959483
BRD-K02515288-001-01-1	1.15525	0.837167	0.919008	0.662304
BRD-K02516190-001-02-4	0.834593	0.751773	0.873365	0.935199
BRD-K02524411-001-01-3	0.822476	0.793095	0.936174	0.78214
BRD-K02530694-001-02-6	0.732125	1.51569	1.01639	1.08076
BRD-K02535446-001-01-8	0.845995	1.04141	0.891438	0.872919
BRD-K02539486-001-01-1	0.558764	0.852463	0.959787	0.506265
BRD-K02543410-001-01-4	0.0910083	0.346404	1.04224	0.605266
BRD-K02573389-001-01-8	0.935739	1.00431	0.918901	1.08775
BRD-K02577117-019-01-0	0.644336	0.844103	0.985269	1.09453
BRD-K02580474-001-01-9	0.718179	0.74963	0.902833	0.876025
BRD-K02592971-001-01-2	0.866231	0.82884	0.914745	0.911355
BRD-K02593152-001-01-1	0.770252	1.03116	0.928399	1.07617
BRD-K02595530-001-01-9	0.47884	0.379306	0.936334	1.03445
BRD-K02598395-001-01-7	0.73918	0.46887	0.982337	0.824389
BRD-K02598618-001-01-8	1.36307	0.5451	0.899359	0.827408
BRD-K02624724-001-01-3	0.595437	1.37452	0.890599	0.951116
BRD-K02625776-001-01-7	1.07735	0.294623	0.903095	1.00487
BRD-K02628807-001-01-4	0.868576	0.878457	0.985115	1.07103
BRD-K02630367-001-01-2	0.615195	0.607179	0.880195	0.966062
BRD-K02635441-001-01-1	1.38362	1.22954	0.966255	0.982446
BRD-K02645790-001-01-7	0.79205	0.956822	0.968881	0.728093
BRD-K02653582-001-01-3	0.446537	0.79541	0.879865	0.981649
BRD-K02665107-001-01-3	0.975766	0.871918	0.960163	1.10231
BRD-K02689416-001-01-9	0.208418	0.24858	0.878703	1.05124
BRD-K02689622-001-01-9	1.04902	1.15946	0.953155	0.950231
BRD-K02694971-001-01-6	0.858445	0.788407	0.94679	0.856606
BRD-K02708061-001-01-5	0.612781	1.03266	0.883427	0.972565
BRD-K02713262-001-01-2	1.06022	0.763933	0.853767	1.01928
BRD-K02732091-001-01-9	0.604432	0.855194	0.871187	0.97458
BRD-K02732259-001-01-7	0.535076	0.702818	0.979416	0.971066
BRD-K02734181-001-01-6	1.35817	0.716652	0.899215	1.01778
BRD-K02737601-001-01-1	1.0039	0.972016	0.880529	0.937718
BRD-K02747732-001-01-2	0.795281	0.883587	0.880595	0.86781
BRD-K02749944-001-01-2	0.793032	0.539732	0.950708	0.959811
BRD-K02750843-001-01-2	1.04131	1.02823	0.834922	0.983157
BRD-K02776177-001-01-3	0.619428	0.5563	0.926572	1.00858
BRD-K02785641-001-01-2	1.25449	0.795619	0.984525	1.28193
BRD-K02796057-001-02-4	0.743648	0.861655	0.950284	0.991595
BRD-K02796109-019-01-6	0.52309	0.83959	0.944686	1.07546
BRD-K02811477-001-02-3	0.547795	0.94742	0.994026	0.688036
BRD-K02813527-001-01-1	0.605713	0.67864	0.915175	0.946932
BRD-K02825289-001-01-3	0.820577	0.771133	0.995077	0.897157
BRD-K02840352-001-01-4	1.182	1.11347	0.923782	0.998412
BRD-K02840883-001-02-0	0.73772	0.653835	0.899024	0.815582
BRD-K02903234-001-01-4	0.925813	0.889871	0.914007	0.962537
BRD-K02929561-001-01-2	1.13559	0.968633	1.02392	1.035
BRD-K02931142-001-01-6	0.416964	0.346662	0.890052	0.982876
BRD-K02940640-001-01-4	0.968115	0.42912	0.906064	0.88473
BRD-K02943940-001-01-5	0.842138	0.981848	0.983454	0.926773
BRD-K02950830-001-01-3	1.30801	1.34078	1.05947	0.890936
BRD-K02952507-004-02-3	1.47084	1.45657	0.93481	0.945153
BRD-K02953737-001-01-1	0.539291	0.732891	0.924062	1.09019
BRD-K02960110-001-02-1	0.888821	0.72802	0.960735	1.04009
BRD-K02995950-001-01-2	1.17311	0.906812	0.996748	1.03522
BRD-K03010854-001-01-6	0.846281	1.79689	0.861283	1.02694
BRD-K03013810-001-01-3	0.782559	1.14491	0.93604	0.95525
BRD-K03034193-004-02-8	1.14549	1.1843	1.02976	0.815854
BRD-K03043432-001-01-8	0.538635	0.672498	0.839298	0.960596
BRD-K03048862-001-01-6	1.41191	1.26134	0.936287	0.953344
BRD-K03056434-001-01-8	0.811815	0.630349	0.869273	0.907491
BRD-K03067757-001-01-4	0.946712	1.17421	0.819691	0.972372
BRD-K03069137-001-01-1	0.88894	0.472481	0.879852	0.832926
BRD-K03072827-001-01-0	1.56436	0.978334	0.874215	0.835247
BRD-K03124495-001-01-0	0.906786	0.649512	1.05622	1.11283
BRD-K03128399-001-02-6	1.21705	0.351905	1.09938	0.956214
BRD-K03151536-001-01-4	0.686326	0.760192	0.86109	0.95585
BRD-K03180599-001-01-7	1.10596	0.633767	0.984625	0.995987
BRD-K03201207-001-01-5	0.552218	1.05872	0.985829	0.88346
BRD-K03208411-001-01-2	0.516325	1.57564	0.965562	0.942002
BRD-K03209844-001-02-5	0.653092	0.773592	0.926176	1.02424
BRD-K03210181-001-01-6	1.00179	1.14449	0.982988	1.08375
BRD-K03213425-001-01-6	0.763911	0.679318	0.932044	1.06574
BRD-K03223506-001-01-7	0.959786	0.867153	0.956714	0.970083
BRD-K03228956-001-01-1	1.14865	0.781252	0.943189	0.904866
BRD-K03229346-001-01-8	0.596246	1.0765	0.902686	0.933465
BRD-K03233794-001-01-7	0.733463	0.779665	0.947944	0.969987
BRD-K03235359-001-01-9	1.07402	0.391699	0.92365	0.98196
BRD-K03235713-001-01-0	0.99714	0.454446	0.922045	0.846297
BRD-K03248094-001-01-2	1.16299	0.982279	1.17471	1.05407
BRD-K03260289-001-01-2	1.57591	1.05188	0.890346	0.851368
BRD-K03272554-001-01-5	1.17612	0.657156	0.981112	0.635978
BRD-K03307634-001-02-1	1.05408	0.924538	0.838904	0.944334
BRD-K03312595-001-01-0	0.891908	0.324909	1.0167	0.647432
BRD-K03319520-001-01-5	0.705559	1.00915	0.934315	1.0135
BRD-K03352270-001-01-8	0.767886	0.401861	0.893869	0.754497
BRD-K03371656-001-01-2	0.814762	0.776416	0.92369	1.02341
BRD-K03373364-001-01-1	0.753495	0.722565	0.928661	1.06888
BRD-K03384615-001-01-5	1.16906	0.576486	1.02017	1.02561
BRD-K03390828-001-01-5	0.469641	1.38615	0.880087	0.984506
BRD-K03403405-001-03-3	0.250925	0.430689	0.92293	0.961588
BRD-K03406275-001-01-7	0.747046	1.30013	1.01252	1.06159
BRD-K03413212-001-01-9	0.786584	0.759299	0.892709	0.976945
BRD-K03427362-001-01-7	0.450896	1.82074	1.01129	1.00303
BRD-K03430401-001-01-4	1.37468	1.20293	0.981772	1.04911
BRD-K03438483-001-01-8	0.890886	1.50878	0.862299	1.00482
BRD-K03446421-001-01-6	1.06619	0.598106	0.919678	0.940215
BRD-K03448064-001-01-4	1.00799	1.93045	0.895429	1.08159
BRD-K03463440-001-01-8	0.975533	0.80631	0.880138	0.888881
BRD-K03463715-001-01-6	0.631501	0.599854	1.02536	1.01008
BRD-K03466118-001-01-2	0.941331	0.522166	0.882889	0.955742
BRD-K03479970-001-02-0	0.659736	0.622232	0.934439	1.00204
BRD-K03489549-001-01-3	1.02733	0.469493	0.979522	0.917435
BRD-K03489549-001-03-9	1.3452	1.07296	0.926763	0.949669
BRD-K03489727-001-01-7	1.38242	0.978424	0.976016	0.983166
BRD-K03496060-001-01-7	0.733237	0.39284	0.843025	0.914396
BRD-K03496358-001-01-8	1.08334	0.716861	1.02016	0.87066
BRD-K03496708-001-01-5	0.895946	0.691313	0.965593	0.851978
BRD-K03515135-001-01-5	0.909844	0.720943	1.06565	1.10246
BRD-K03519778-001-01-9	1.06189	0.975111	0.973601	0.974444
BRD-K03522229-001-01-8	0.510729	0.671301	0.957004	1.03368
BRD-K03543008-001-01-1	0.822859	0.718589	0.947509	0.962443
BRD-K03568952-001-01-4	0.883528	0.911167	0.935093	0.808101
BRD-K03571420-001-01-2	0.706744	1.8096	0.960711	1.02294
BRD-K03587208-001-01-6	0.780519	0.510443	0.901476	0.960871
BRD-K03589483-001-01-8	0.679754	0.852167	0.911991	1.05499
BRD-K03589569-001-01-5	1.23222	1.01481	0.934334	1.0776
BRD-K03608142-001-01-9	0.604989	0.67483	0.951273	0.779444
BRD-K03610256-001-01-7	0.793218	0.879522	0.968285	0.98807
BRD-K03622219-001-01-8	0.294529	0.754225	0.74389	0.995255
BRD-K03641022-001-01-5	0.814473	0.621958	0.926844	0.977668
BRD-K03641319-001-01-7	0.591772	0.732164	1.03701	1.03292
BRD-K03651051-001-01-8	0.685445	0.881714	0.947837	1.08811
BRD-K03669312-001-01-5	0.666028	1.58924	0.891616	0.970669
BRD-K03683163-001-01-6	1.24509	0.706281	1.06235	0.856574
BRD-K03683409-001-01-0	0.758594	0.831282	0.9834	0.764962
BRD-K03695354-001-01-9	1.03606	0.738026	0.821386	0.973931
BRD-K03696926-001-01-6	1.04362	0.973154	1.0042	0.986384
BRD-K03697080-001-01-6	0.851294	0.934428	0.926447	1.13003
BRD-K03707088-001-01-5	1.16978	0.852626	0.990294	0.930764
BRD-K03716420-001-01-3	0.843	0.869179	1.02391	0.984358
BRD-K03770502-001-01-1	1.01866	0.556039	0.905103	0.947235
BRD-K03773932-001-01-5	0.619319	0.709101	0.911842	0.987241
BRD-K03785392-001-01-2	1.25286	1.0374	0.993534	0.980503
BRD-K03789334-001-01-5	1.22846	1.28925	0.973089	0.928817
BRD-K03792852-001-01-1	0.929906	0.675675	0.95023	0.953141
BRD-K03795299-001-01-5	0.943506	1.07342	0.955739	1.02951
BRD-K03807141-001-01-8	0.798085	0.996433	0.99798	0.951229
BRD-K03808778-001-01-6	0.987403	0.70081	0.870151	1.06136
BRD-K03817886-001-02-4	1.08089	0.705527	0.936874	0.998819
BRD-K03829231-001-01-3	0.950464	1.14562	1.01056	0.842417
BRD-K03845749-001-01-4	0.807231	0.556091	0.837229	0.906343
BRD-K03849840-001-01-4	1.03616	0.443618	0.949931	0.662306
BRD-K03864628-001-01-1	1.21134	1.20572	0.977592	1.07112
BRD-K03875473-001-01-3	1.15084	0.731761	0.870597	1.04643
BRD-K03881003-001-01-0	1.15404	0.449655	0.890482	0.951817
BRD-K03888308-001-01-7	0.737998	0.592111	1.0391	0.772892
BRD-K03899474-001-01-2	0.945027	0.849901	0.934649	1.02362
BRD-K03906328-001-01-3	0.866746	0.629749	0.818331	1.01241
BRD-K03921744-001-01-8	1.15462	0.590531	0.861377	0.979786
BRD-K03935278-001-01-2	1.12511	0.969631	0.961421	1.04965
BRD-K03936430-001-01-5	0.680785	0.385694	0.971162	1.01692
BRD-K03950553-001-01-7	0.863031	0.599539	0.946098	0.462633
BRD-K03967758-001-01-4	0.970804	0.713016	0.872977	0.870651
BRD-K03990819-001-01-3	0.901936	1.11979	0.9581	0.996644
BRD-K03992415-001-01-7	1.06012	1.4217	0.934312	0.961978
BRD-K04002036-001-01-3	0.978355	1.48705	0.869092	1.00061
BRD-K04007039-001-01-9	0.82867	0.493093	0.873108	0.77451
BRD-K04007716-001-01-9	0.596642	0.513679	1.00479	0.982143
BRD-K04014549-001-01-8	0.755212	0.717289	1.10052	0.897182
BRD-K04014765-001-01-5	0.674869	0.959024	0.939922	1.13334
BRD-K04021565-001-01-2	0.806618	1.20754	1.0112	0.984973
BRD-K04025047-001-01-1	0.964142	0.912216	0.985252	0.976298
BRD-K04031330-001-01-5	0.95334	0.538084	0.899828	1.02617
BRD-K04058031-001-01-0	1.18608	1.02207	0.986499	1.05224
BRD-K04067194-001-01-4	1.24398	0.419039	0.938671	0.782871
BRD-K04077479-001-01-9	1.12735	0.762383	0.859152	0.978615
BRD-K04078927-001-01-5	0.812021	0.791126	0.94405	1.12071
BRD-K04086909-001-01-0	0.512798	0.859738	0.888023	0.977032
BRD-K04089243-001-01-9	0.815057	0.906852	1.00389	1.13357
BRD-K04101993-001-01-4	0.1469	1.53633	0.923996	1.08043
BRD-K04123911-001-01-7	0.731943	0.73527	0.8546	0.674742
BRD-K04133968-001-01-8	0.793131	0.629686	0.985677	0.6884
BRD-K04137473-001-01-7	0.489567	1.01022	0.924634	0.728805
BRD-K04139743-001-01-7	0.857431	0.60904	0.997768	1.08071
BRD-K04147035-001-01-7	0.667867	1.01418	1.06021	0.848395
BRD-K04157712-001-01-6	0.985287	1.06516	0.922324	1.03336
BRD-K04167431-001-01-5	1.03027	0.538095	1.00353	0.96349
BRD-K04192660-001-01-5	0.946263	0.719365	0.923748	0.986818
BRD-K04195898-001-01-2	0.705585	1.80403	0.954652	0.73709
BRD-K04229162-001-01-8	0.389014	0.880631	0.950262	0.865594
BRD-K04230416-001-01-0	0.835448	1.29384	0.91511	0.977391
BRD-K04232710-001-01-9	0.483404	0.382093	0.896174	1.01014
BRD-K04237818-001-01-9	0.649669	0.285387	1.01193	0.727799
BRD-K04238677-001-01-7	0.505035	0.918015	0.909685	1.03027
BRD-K04239420-001-01-5	0.810735	0.727357	0.915526	1.07783
BRD-K04245498-001-02-7	1.23665	0.882153	0.893464	1.00586
BRD-K04262895-001-01-3	0.54708	0.888428	0.927238	0.983305
BRD-K04269174-001-01-0	1.12248	1.08098	1.01877	0.971492
BRD-K04288605-001-01-9	0.870387	1.14859	0.998262	1.06869
BRD-K04289865-001-01-2	1.14667	0.930249	0.904414	0.984738
BRD-K04291521-001-01-4	0.484128	0.771458	0.903918	1.01296
BRD-K04302747-001-01-7	1.27546	1.23732	0.968573	0.937981
BRD-K04311254-001-01-3	0.861601	0.87737	0.987955	1.0195
BRD-K04317371-001-01-8	0.890279	0.76373	0.976426	1.10785
BRD-K04321001-001-01-8	0.701396	0.514659	1.00484	0.722043
BRD-K04332056-001-01-9	0.692039	1.71553	1.02093	1.08662
BRD-K04343070-001-01-8	0.278674	0.918477	0.781426	0.89253
BRD-K04356047-001-01-0	1.19181	0.847513	0.819405	0.792581
BRD-K04362735-001-01-5	0.649798	1.10986	0.93241	1.05761
BRD-K04364654-001-01-8	0.654108	0.64304	0.944081	0.79614
BRD-K04366697-001-01-2	0.533671	0.780533	0.929326	1.01322
BRD-K04371396-001-01-6	0.385864	0.893103	1.03784	1.12215
BRD-K04388400-001-01-4	1.08955	0.667372	0.964986	0.991825
BRD-K04403520-001-01-6	0.679996	0.891303	0.922358	0.987457
BRD-K04408214-001-01-6	0.846279	0.6827	0.841774	1.01826
BRD-K04418684-001-01-6	0.909757	0.728838	1.02239	0.758207
BRD-K04425222-001-01-0	1.06227	0.869838	0.885722	0.939213
BRD-K04429417-001-01-7	0.783796	0.78564	0.922646	0.960799
BRD-K04445149-001-01-8	0.669065	1.46151	0.951893	0.933156
BRD-K04481263-001-01-3	0.578791	0.621649	0.973263	0.906636
BRD-K04490516-001-01-9	1.07935	0.666244	0.951267	0.989961
BRD-K04510895-001-01-5	0.903044	0.844956	0.965306	0.996423
BRD-K04515815-001-01-1	0.958161	0.953386	0.84189	0.98399
BRD-K04515993-001-01-5	1.14093	1.38961	0.927771	1.00314
BRD-K04517117-001-01-2	0.671944	1.6502	1.0342	1.17313
BRD-K04546974-001-01-3	1.0904	1.12705	1.01899	1.07092
BRD-K04561891-019-01-4	0.752738	0.827809	1.02579	1.1293
BRD-K04562016-001-01-0	0.617637	0.511871	0.948963	1.03564
BRD-K04570341-001-01-9	0.935179	0.469676	0.941328	0.749673
BRD-K04574057-001-01-5	0.836902	0.903788	0.931684	1.03907
BRD-K04577097-001-01-0	1.05433	0.758499	0.916695	0.969131
BRD-K04588345-001-01-7	1.3531	0.773294	0.938102	0.903689
BRD-K04598080-001-01-5	0.356013	0.892436	0.900115	0.704731
BRD-K04605557-001-01-2	-0.0635586	0.659008	1.00185	0.616152
BRD-K04609088-001-01-2	0.464316	0.89232	0.983113	1.09817
BRD-K04611090-001-01-4	0.941446	0.85285	0.891517	1.02795
BRD-K04621424-001-01-0	0.0156242	0.840832	0.990855	0.573323
BRD-K04627808-001-01-3	0.537266	0.816323	0.89157	0.879469
BRD-K04628654-001-01-6	0.748815	0.42447	0.878654	0.843677
BRD-K04647398-001-01-7	0.830712	1.06407	0.917169	1.02029
BRD-K04669444-001-01-5	0.697536	0.402079	0.954883	0.865962
BRD-K04725240-001-01-1	0.837747	1.34472	1.00303	1.04834
BRD-K04729818-001-01-5	1.12107	0.966678	0.970013	0.946592
BRD-K04745699-001-01-5	0.719126	0.706054	0.944204	1.07289
BRD-K04753511-001-01-5	1.20974	0.917176	0.952495	0.868199
BRD-K04758289-001-01-4	0.67974	0.714373	0.963873	0.959693
BRD-K04771555-001-01-4	1.01716	1.21567	0.976021	0.913881
BRD-K04791783-001-01-6	1.24185	0.62771	0.979395	1.08598
BRD-K04825075-001-01-9	0.560576	1.02268	0.939839	0.959425
BRD-K04831789-001-01-4	0.703565	1.2644	0.90773	1.01008
BRD-K04834349-001-01-1	0.476678	0.813755	0.968268	1.08512
BRD-K04847305-001-01-5	0.62206	0.77399	1.00789	1.03551
BRD-K04873321-001-02-9	1.03033	0.681711	0.902787	1.02264
BRD-K04877446-001-01-2	1.15868	1.07192	0.981379	1.06771
BRD-K04883778-001-01-8	0.375921	0.702071	0.911195	0.813823
BRD-K04889486-001-01-8	0.312119	0.453695	0.861281	1.01338
BRD-K04914564-001-01-9	1.24986	0.576759	0.883202	0.9724
BRD-K04918600-001-01-6	0.93101	0.864049	1.05016	1.11752
BRD-K04922687-001-01-4	0.689659	1.62512	0.999869	0.65363
BRD-K04949001-001-01-6	1.32093	1.24817	0.953927	1.00691
BRD-K04959170-001-01-0	0.750212	0.582236	0.890833	0.931324
BRD-K04983929-001-01-4	1.0875	0.911029	0.962328	0.965997
BRD-K05001416-001-01-4	0.714476	0.625187	0.909913	1.25922
BRD-K05002887-001-01-2	1.04839	1.01539	0.906466	1.02594
BRD-K05003837-001-01-1	0.597977	0.751289	0.970401	0.716899
BRD-K05004643-019-01-5	0.592247	0.587758	0.993629	1.09462
BRD-K05018311-001-01-4	0.642953	0.473582	0.967857	1.03413
BRD-K05034428-001-01-1	0.910144	0.841562	0.915353	1.03521
BRD-K05034862-001-01-4	0.84979	0.547734	1.02182	0.779454
BRD-K05047279-019-01-5	0.648091	1.2087	0.945344	0.534855
BRD-K05051567-001-01-6	0.879816	1.39665	0.958566	1.00871
BRD-K05060234-001-01-0	0.291209	1.36894	0.895136	0.793582
BRD-K05068331-001-01-5	0.915191	0.746522	0.916283	0.784213
BRD-K05084202-001-01-8	0.00618956	0.952094	0.938351	1.09931
BRD-K05087650-001-03-4	0.859747	0.688146	0.913865	0.934911
BRD-K05123549-001-01-6	1.17637	0.42802	0.934621	0.807193
BRD-K05127596-001-01-9	0.930757	1.35811	1.0094	0.982833
BRD-K05128360-001-01-1	0.783975	1.36601	0.988228	1.11568
BRD-K05135707-001-01-8	0.929159	1.22688	0.883306	1.05193
BRD-K05142027-001-01-7	1.0582	0.984393	0.877156	0.927665
BRD-K05202167-001-01-9	0.798347	0.71303	0.898872	0.960304
BRD-K05215527-001-01-6	0.306418	0.833426	0.917045	0.983652
BRD-K05229696-001-02-0	0.825711	1.24177	0.927428	1.06931
BRD-K05246899-001-01-1	0.609697	0.745028	0.912397	1.01386
BRD-K05248013-001-01-8	0.771848	0.88407	0.86451	0.898119
BRD-K05260346-001-01-1	0.915268	0.936071	1.01403	1.06934
BRD-K05265677-001-02-7	0.678134	0.679845	1.03888	0.658485
BRD-K05315233-001-01-9	0.654591	0.704963	0.961844	0.559076
BRD-K05332854-001-01-2	0.614057	1.04958	0.92567	1.02766
BRD-K05333330-001-01-4	0.341697	0.889179	0.864051	0.935483
BRD-K05335890-019-01-3	0.508482	0.981523	1.00502	1.06784
BRD-K05338338-001-01-5	1.38135	1.214	0.928779	0.969587
BRD-K05344363-001-01-1	1.08208	1.30209	0.866835	0.946769
BRD-K05387676-001-01-2	1.29292	1.09675	0.88842	0.805969
BRD-K05397005-001-01-3	1.04368	1.44475	0.947459	0.964963
BRD-K05413989-001-01-8	0.768683	0.991123	0.892778	0.572627
BRD-K05418735-001-01-4	0.502697	0.848583	1.01591	0.683803
BRD-K05429949-001-02-1	1.07754	0.84681	0.960834	0.993961
BRD-K05438180-001-01-2	1.05946	1.22771	0.914424	0.965334
BRD-K05447618-001-01-5	0.808232	0.881846	0.906249	0.949055
BRD-K05448102-001-01-6	1.62204	0.43842	0.951023	0.995153
BRD-K05450131-001-01-7	0.783362	0.846674	0.925505	1.02508
BRD-K05465626-001-01-7	0.778599	1.32663	0.834251	0.948916
BRD-K05470326-001-01-0	0.283656	0.216252	1.04414	1.00016
BRD-K05480206-001-01-4	0.970779	1.3966	0.919901	1.04934
BRD-K05487130-001-01-0	0.663964	0.789083	1.00381	1.00028
BRD-K05506742-001-01-7	0.730476	0.74021	0.981511	1.03783
BRD-K05511219-001-01-1	0.928735	0.766261	0.905823	0.979202
BRD-K05520752-001-01-5	1.04281	0.577687	0.957412	0.970178
BRD-K05532904-001-01-7	0.980786	1.16559	0.85261	0.98556
BRD-K05543055-001-01-1	1.28447	0.820585	0.976377	1.07714
BRD-K05572312-019-01-1	0.443406	0.753883	0.955729	1.07832
BRD-K05590341-001-01-6	0.851853	0.738928	0.885502	0.983508
BRD-K05601431-001-01-2	0.866554	0.777503	0.93237	0.914769
BRD-K05613196-001-02-0	0.783383	0.57258	0.964693	0.629858
BRD-K05616059-001-01-1	0.883414	0.968965	0.956131	0.796466
BRD-K05623052-001-01-4	0.998743	1.06529	0.928141	0.927692
BRD-K05637720-001-01-6	0.870791	1.08518	0.970128	0.934132
BRD-K05639119-001-01-1	0.508707	0.271367	0.838982	0.984583
BRD-K05639721-001-01-1	1.19297	1.11651	0.968709	0.829122
BRD-K05645536-001-01-3	1.9229	1.43527	0.92635	0.988033
BRD-K05646497-001-01-8	0.63328	0.802962	0.917718	0.667503
BRD-K05647630-004-01-8	1.12205	0.9772	1.01121	1.0066
BRD-K05649944-001-01-1	1.12822	0.927374	0.874438	0.935467
BRD-K05657319-001-01-1	0.946089	1.22252	0.973265	1.04407
BRD-K05659115-001-01-3	0.8505	1.38837	0.91357	1.04783
BRD-K05662436-001-01-9	0.926199	0.924332	0.866531	0.952107
BRD-K05671267-001-01-4	0.645607	0.819818	0.944755	0.919366
BRD-K05673699-001-01-8	0.913058	1.27009	0.83915	1.01576
BRD-K05688054-001-02-3	0.959206	0.827088	0.950836	0.944435
BRD-K05702937-001-01-7	0.849797	0.637365	0.88146	0.978756
BRD-K05710256-001-01-3	0.914854	0.460462	1.00426	1.013
BRD-K05713002-001-01-4	1.32475	0.49714	0.851327	0.972498
BRD-K05714159-001-01-3	1.08809	0.66764	0.961354	0.899732
BRD-K05721823-001-01-4	0.783685	1.42554	0.855504	1.00952
BRD-K05722694-001-01-8	0.979789	0.668356	0.861622	1.00494
BRD-K05729886-001-01-1	0.842581	0.920751	0.86481	0.972622
BRD-K05740036-001-01-7	1.00532	0.918634	0.907463	0.971563
BRD-K05740295-001-02-1	0.485749	1.08468	0.992858	1.09874
BRD-K05744121-001-01-5	1.17497	0.819856	0.941309	0.929377
BRD-K05772696-001-01-1	0.698332	0.631463	1.06404	0.769402
BRD-K05776061-001-01-9	0.810005	0.789082	0.916146	1.04156
BRD-K05777469-001-01-5	0.443683	0.336904	0.853154	0.647463
BRD-K05778745-001-01-9	0.598513	0.918012	0.919006	0.88142
BRD-K05791917-001-01-4	1.04958	0.595991	0.936371	0.960095
BRD-K05814022-001-01-6	0.516659	0.655729	0.892742	1.03983
BRD-K05815864-001-01-4	0.718025	0.938878	0.845306	0.929867
BRD-K05832178-001-01-0	1.08637	0.74614	0.871826	0.9689
BRD-K05835710-001-01-8	1.16661	0.855438	0.952534	0.926115
BRD-K05851676-001-01-7	0.699978	1.12786	0.982431	0.988986
BRD-K05872785-001-01-1	0.744516	1.683	0.917403	1.03724
BRD-K05888777-019-01-9	0.886985	1.28235	0.936118	0.868517
BRD-K05904822-001-01-7	1.08953	0.8589	0.888705	0.953922
BRD-K05906947-001-01-2	0.586251	0.755287	1.01944	0.929297
BRD-K05907338-001-01-7	0.307352	1.01002	0.939327	0.857137
BRD-K05925286-001-01-1	0.452524	0.775041	0.98749	0.495051
BRD-K05928130-001-01-3	1.41351	1.19151	0.967792	1.01864
BRD-K05931533-001-01-0	1.52632	0.34821	0.943359	0.949448
BRD-K05931933-001-01-6	0.62435	0.785004	0.885749	0.954996
BRD-K05948815-001-01-3	0.920358	0.776929	1.02515	0.957257
BRD-K05951707-001-01-8	0.735177	0.916663	1.00508	0.726372
BRD-K05953238-001-01-2	1.03241	0.539566	1.10857	0.886723
BRD-K05959124-001-01-6	0.942789	0.596467	0.97042	0.98437
BRD-K05970291-001-01-0	1.10223	1.0843	1.01687	1.06622
BRD-K05973149-001-01-8	0.62873	0.43169	0.901684	1.0922
BRD-K05984448-001-01-3	1.03793	0.48431	0.858704	0.966825
BRD-K05994859-001-01-4	0.767973	0.710376	0.950235	0.928004
BRD-K06039860-001-01-4	0.969022	1.19983	0.918335	0.982736
BRD-K06039860-001-02-2	1.05402	1.33856	0.950319	0.977451
BRD-K06060086-001-01-8	0.553174	0.583622	1.10972	0.874046
BRD-K06062006-001-01-1	1.01204	1.03584	1.10281	1.07436
BRD-K06083657-001-01-9	0.760319	1.0098	0.910757	1.06505
BRD-K06104811-001-01-6	1.01093	0.77678	0.940207	1.09425
BRD-K06104833-001-01-0	0.460611	0.819225	0.853247	0.984207
BRD-K06111088-001-01-7	0.815261	1.05605	0.978003	0.828833
BRD-K06112762-001-01-8	0.31792	0.803282	0.962485	0.99198
BRD-K06132706-001-01-5	1.36556	0.468941	0.946882	0.975509
BRD-K06134631-001-02-9	0.839851	0.84083	0.934494	1.03572
BRD-K06148621-001-01-3	0.97521	1.02189	1.01929	1.05794
BRD-K06163572-001-01-1	0.545209	0.78435	0.902931	1.00942
BRD-K06199632-001-01-3	0.583418	0.830589	0.913628	0.935581
BRD-K06202986-001-01-7	0.956917	0.847748	0.912154	0.880335
BRD-K06203116-001-01-8	0.683559	0.768679	0.845257	0.785213
BRD-K06209369-001-01-9	0.65355	0.407924	0.946601	1.02005
BRD-K06212126-019-01-9	0.710151	1.04973	0.998967	1.08079
BRD-K06217925-001-01-9	0.901692	0.409148	0.919256	1.04066
BRD-K06228572-001-01-2	0.677051	1.27769	0.936772	0.682899
BRD-K06237859-001-01-7	1.4756	0.604649	0.892357	0.892398
BRD-K06253055-001-01-6	1.11035	0.568991	0.918337	1.00517
BRD-K06256712-001-01-4	0.758878	0.487987	0.979537	0.67246
BRD-K06261202-001-01-1	1.07094	0.619113	0.927262	0.891385
BRD-K06303559-001-01-0	0.780783	1.18885	0.935486	1.0779
BRD-K06326887-001-01-4	1.13038	0.583545	0.940803	0.947195
BRD-K06338704-001-01-0	0.751529	0.749684	0.938863	1.03398
BRD-K06359153-001-01-2	1.49448	0.576277	0.878949	0.938693
BRD-K06362413-001-01-2	1.06402	0.833168	1.02313	1.07773
BRD-K06373645-001-01-9	0.786677	0.587782	0.943494	0.854902
BRD-K06391415-001-01-9	1.02334	1.00496	0.873135	0.912944
BRD-K06421244-001-01-1	0.919501	1.33131	0.930448	0.941323
BRD-K06421369-001-01-0	0.0555426	0.621654	0.864288	1.07009
BRD-K06425073-001-01-8	0.91621	0.688843	0.900848	0.951284
BRD-K06426546-001-01-5	0.60442	1.11494	0.968706	0.760099
BRD-K06431655-001-02-0	1.11902	1.08197	0.871657	0.992055
BRD-K06434316-001-01-7	0.552008	0.971945	0.851316	0.89928
BRD-K06436793-001-01-4	0.751002	1.37695	0.940404	0.765776
BRD-K06457057-001-01-1	0.9851	0.899395	1.08249	0.921833
BRD-K06470746-001-01-1	0.856844	1.04139	1.06085	1.13807
BRD-K06499413-001-01-2	0.894017	0.722602	0.697772	0.787073
BRD-K06500227-001-01-3	0.71918	0.537686	0.882956	0.965734
BRD-K06503599-001-02-5	0.56159	0.905839	0.923168	1.10082
BRD-K06509069-001-01-5	0.505045	1.0338	0.974566	0.924271
BRD-K06509758-001-01-1	0.604996	0.79195	0.91465	0.904921
BRD-K06514792-001-01-9	1.01563	1.00656	1.00442	1.03711
BRD-K06518099-001-01-0	0.889469	1.50706	0.914116	1.04019
BRD-K06521224-001-01-2	0.721015	0.865366	0.929384	0.906947
BRD-K06532738-001-01-8	0.652614	0.955112	0.940496	0.570654
BRD-K06550516-001-01-8	0.890996	1.13085	0.920368	1.04176
BRD-K06568278-001-02-6	0.936026	0.457758	1.01432	0.616672
BRD-K06614363-001-01-6	0.90488	0.934267	0.86021	0.816923
BRD-K06614755-001-01-2	0.90893	0.870592	0.962391	1.01567
BRD-K06616433-001-01-7	0.871754	0.714767	0.936347	1.05661
BRD-K06619089-001-01-8	0.748584	0.882111	0.946497	1.08263
BRD-K06629982-001-01-5	0.475109	0.641313	0.829324	0.949691
BRD-K06630024-001-01-3	1.17806	1.14741	0.90667	0.890358
BRD-K06647148-001-01-8	0.682632	0.864006	0.826511	0.950876
BRD-K06657736-001-01-5	0.25856	0.990738	0.940328	0.977539
BRD-K06663690-001-01-7	0.953615	0.87237	0.905595	0.968185
BRD-K06667255-001-01-5	1.10089	0.745134	1.02844	1.04843
BRD-K06678077-001-01-8	1.14353	0.611647	0.96876	0.933385
BRD-K06680218-001-01-4	0.751884	1.4766	0.964514	0.952524
BRD-K06684848-001-02-2	0.868595	0.35808	1.02057	0.748733
BRD-K06688693-001-01-1	0.536182	1.03591	0.904533	0.732458
BRD-K06690560-001-01-7	0.863541	0.960445	0.961858	0.804471
BRD-K06713449-001-01-4	0.766125	1.00173	0.88597	0.859575
BRD-K06714535-001-01-7	0.615313	0.507466	0.933333	0.875388
BRD-K06715209-001-01-9	1.14586	1.00723	0.994472	1.01115
BRD-K06716139-001-01-2	1.18325	0.507447	0.918212	0.727294
BRD-K06718330-001-01-5	1.19927	0.984861	0.914629	0.89484
BRD-K06725890-019-01-4	0.774984	1.17173	0.933177	0.981641
BRD-K06731779-001-01-6	0.633965	0.746825	0.886656	0.988717
BRD-K06735789-001-01-5	0.738999	1.16632	0.891934	0.936222
BRD-K06743007-001-01-5	0.849843	0.86454	0.759379	0.89816
BRD-K06761222-001-01-6	0.521049	0.271086	0.825809	0.970171
BRD-K06769304-001-01-0	1.02206	1.66667	0.964598	0.794995
BRD-K06772064-001-01-4	1.00882	0.976706	0.87446	0.968436
BRD-K06780475-001-01-0	1.03299	0.759986	0.943392	1.00787
BRD-K06791944-001-01-0	0.802315	0.429282	0.916626	0.953995
BRD-K06794322-001-01-6	0.672528	0.883412	0.910339	1.07127
BRD-K06804050-001-01-1	0.723578	0.961567	0.932068	0.845115
BRD-K06806702-001-01-8	0.827152	0.63821	0.972707	0.934632
BRD-K06816133-001-01-6	0.566393	0.804489	0.901097	1.0412
BRD-K06828696-001-01-0	1.55573	0.666889	0.834746	0.99805
BRD-K06842972-001-01-6	0.540924	1.05693	1.01239	0.970005
BRD-K06844498-001-01-7	0.684898	0.864387	0.908382	0.766996
BRD-K06846146-001-01-8	1.06837	0.605421	0.935064	0.968708
BRD-K06877504-001-01-9	0.76837	1.24042	0.977173	1.11559
BRD-K06882197-001-01-1	1.53579	1.25738	0.960252	1.06295
BRD-K06886547-001-01-9	0.7699	0.832047	0.891042	0.929442
BRD-K06891569-001-01-2	0.652444	1.21584	0.931947	0.972828
BRD-K06893495-001-01-7	1.49307	1.17214	0.879187	0.96764
BRD-K06895313-001-01-2	0.620379	0.944284	0.892557	0.83814
BRD-K06898795-001-01-3	1.0186	1.1505	0.975011	1.05614
BRD-K06898937-001-01-2	0.762353	1.07933	0.970346	1.01928
BRD-K06902141-001-01-4	0.732598	1.00392	0.92856	1.01621
BRD-K06907095-001-01-9	0.878932	0.484503	0.862805	0.959508
BRD-K06910827-001-01-8	0.807675	0.777964	0.926851	0.957639
BRD-K06935006-001-01-8	0.736231	0.992833	0.932916	0.882354
BRD-K06953509-001-01-3	0.758451	0.868462	0.871687	1.00318
BRD-K06992369-001-01-0	0.783788	0.953385	1.01135	0.937064
BRD-K06995744-001-01-9	0.347582	0.629536	1.00616	0.918018
BRD-K07001848-001-02-8	0.692385	0.668679	0.854694	0.976562
BRD-K07003918-001-01-1	1.19285	0.981244	0.997304	1.07894
BRD-K07004447-004-02-1	1.12014	0.764456	0.987107	0.955309
BRD-K07009788-001-01-5	0.932457	1.27293	0.977306	0.734815
BRD-K07020505-001-01-4	0.680107	0.676117	0.913418	0.960506
BRD-K07088914-001-01-6	0.796897	1.26295	0.927038	1.04383
BRD-K07100440-001-01-2	0.912801	0.783494	0.924903	0.599728
BRD-K07105437-001-01-6	0.962018	1.14556	0.987105	1.02444
BRD-K07107626-003-02-7	0.836339	0.847786	0.960121	0.965498
BRD-K07129792-001-01-5	0.947233	0.872547	0.906993	0.980034
BRD-K07152092-001-01-4	0.899516	1.15331	0.868075	0.984569
BRD-K07157902-001-01-3	0.544502	0.790474	0.961372	1.00672
BRD-K07164057-001-01-2	0.668104	0.534602	0.899457	1.01897
BRD-K07165915-001-01-1	0.417812	0.696151	1.00912	0.723165
BRD-K07176490-001-01-1	0.7929	1.22265	0.848549	0.870478
BRD-K07184814-001-01-4	0.992343	0.579069	0.91397	0.901933
BRD-K07185297-001-01-7	0.868948	0.917604	0.928094	1.05817
BRD-K07265958-001-01-7	1.18481	1.44304	1.02072	1.00846
BRD-K07266547-001-01-3	0.396063	0.835872	0.921007	1.14666
BRD-K07269289-001-01-9	1.65367	0.864467	0.920849	0.92391
BRD-K07275281-001-01-4	0.895195	0.930282	0.893654	0.993411
BRD-K07303702-001-01-5	1.26484	1.24868	0.974774	1.06104
BRD-K07329815-001-01-4	1.07965	0.680975	0.995696	0.962406
BRD-K07357513-001-01-0	0.686547	0.744421	0.898229	0.963327
BRD-K07357879-001-02-6	1.02001	1.08438	0.963059	0.959641
BRD-K07374908-001-01-8	0.242337	0.960604	0.994066	1.15826
BRD-K07385663-001-01-9	1.22676	0.838604	0.930815	0.953383
BRD-K07395411-001-01-3	0.919373	1.01691	0.910083	0.793265
BRD-K07408742-001-01-4	0.792935	0.785343	0.963591	0.969205
BRD-K07420629-001-01-7	0.905067	1.33313	1.02646	0.969849
BRD-K07431800-001-01-5	1.17344	1.493	0.914969	0.869871
BRD-K07444373-001-01-5	0.91312	1.38679	1.06158	0.99185
BRD-K07448100-001-01-6	0.722454	0.64373	0.868558	0.982439
BRD-K07461567-001-02-3	0.541538	0.739864	0.937318	1.02935
BRD-K07465682-001-01-6	0.914607	0.925754	1.03673	1.15743
BRD-K07466598-001-01-7	0.555289	0.633455	0.932001	0.961716
BRD-K07472106-001-02-8	0.69993	1.02776	0.807903	0.888666
BRD-K07473245-001-01-0	1.31006	0.672461	0.983647	0.885246
BRD-K07481948-001-01-3	0.972637	1.36293	0.866394	0.96525
BRD-K07489055-001-01-5	0.813175	0.464728	0.908175	0.841358
BRD-K07493822-001-01-9	1.47075	0.864563	0.962529	0.936587
BRD-K07524899-001-01-9	0.707455	1.20004	1.01497	0.989
BRD-K07546004-001-01-4	1.38573	1.23228	1.03821	0.944274
BRD-K07547422-001-01-6	1.08496	0.695076	0.914747	0.728637
BRD-K07548549-001-01-2	0.764382	0.885155	0.948852	0.974365
BRD-K07551625-001-01-3	0.811993	0.637026	0.971273	1.02305
BRD-K07561968-001-01-7	0.635875	0.688589	0.945324	0.82107
BRD-K07563749-001-01-9	0.632254	0.346307	0.843828	0.762077
BRD-K07569427-001-02-3	0.522989	1.93716	1.04077	1.0319
BRD-K07572455-001-01-4	0.915645	0.475739	0.936376	0.902488
BRD-K07591425-001-01-1	0.934993	0.771536	1.09246	1.02968
BRD-K07592345-001-01-6	0.373337	0.92897	0.908265	0.750744
BRD-K07613753-001-01-5	0.435265	1.0994	0.788339	0.986323
BRD-K07614712-001-01-3	1.22892	0.637319	1.03557	0.708822
BRD-K07625901-001-01-0	1.25642	0.549225	0.927631	0.952888
BRD-K07634536-001-01-5	1.09077	0.972817	0.958151	0.970616
BRD-K07660364-001-01-7	0.772653	0.449563	0.867903	0.89323
BRD-K07664011-001-01-6	1.13795	0.620026	0.932495	0.895074
BRD-K07674780-001-01-4	0.991492	1.06596	0.997942	0.884784
BRD-K07686903-001-01-0	0.683181	0.906109	1.13911	1.07519
BRD-K07702264-001-01-8	0.793285	1.49505	0.978453	1.05834
BRD-K07727346-001-01-7	1.15463	1.67328	0.91957	1.00723
BRD-K07730888-001-01-5	1.27681	0.694964	0.893522	0.965707
BRD-K07738109-001-01-1	0.995155	0.702741	0.887224	0.96959
BRD-K07740310-001-01-2	1.14066	1.00366	0.919005	1.03591
BRD-K07762176-001-02-7	0.622226	1.04681	0.934046	0.904113
BRD-K07778122-001-01-0	0.676551	0.485115	0.902709	0.971457
BRD-K07786204-001-01-4	0.397882	0.852724	0.847791	0.972711
BRD-K07790303-001-01-6	1.25933	0.423616	0.97599	0.908253
BRD-K07799833-004-02-8	1.54535	0.656334	0.939941	0.910422
BRD-K07847391-001-01-7	0.872433	0.930254	0.937912	1.09644
BRD-K07877451-001-01-1	1.07881	1.35298	0.98717	1.00478
BRD-K07888312-001-01-7	0.78466	0.896853	0.944463	1.01811
BRD-K07918661-001-01-9	1.06086	1.09154	0.927815	0.957716
BRD-K07924982-001-01-9	0.922767	0.665392	0.992904	1.04413
BRD-K07926611-001-02-1	0.957702	1.09415	0.903186	0.966588
BRD-K07928306-001-01-9	1.03394	0.412502	0.873739	0.959895
BRD-K07929213-001-01-9	1.22872	0.584437	0.897365	0.998502
BRD-K07933192-001-01-6	0.808055	0.941259	0.983862	0.601853
BRD-K07935321-001-01-5	0.916688	0.819512	0.995714	1.03736
BRD-K07951568-001-01-4	1.0107	0.645503	0.877374	0.965988
BRD-K07974357-001-01-1	0.749337	0.871903	0.899716	1.10339
BRD-K07988588-001-01-2	1.13032	0.924601	0.939078	1.03914
BRD-K07995454-001-01-8	1.1563	1.48274	0.991687	1.0351
BRD-K07996284-001-01-2	0.564772	0.696985	1.01046	0.976342
BRD-K08002976-001-01-1	0.721328	0.626658	0.889299	0.997317
BRD-K08004257-001-02-5	0.77526	0.68315	0.792865	0.892143
BRD-K08006576-001-01-6	0.718992	0.874094	0.878745	0.962969
BRD-K08008963-001-01-3	0.92934	0.610997	0.979581	0.872003
BRD-K08009675-001-01-0	0.585193	0.931564	1.03993	1.00714
BRD-K08031329-001-02-2	0.774371	1.07237	0.936184	1.0058
BRD-K08035170-001-01-5	1.45229	0.638235	0.846901	0.964963
BRD-K08040026-001-01-1	1.13122	0.707163	0.95224	0.963596
BRD-K08043024-001-01-7	1.00789	0.936647	0.943286	1.07031
BRD-K08046772-001-01-4	1.37402	0.987696	0.980016	1.04161
BRD-K08068667-001-01-6	1.24595	0.93504	1.00548	1.0204
BRD-K08075609-001-01-2	1.06405	0.519194	0.92631	0.880274
BRD-K08078340-001-01-0	1.43909	0.957334	0.973675	0.984476
BRD-K08105311-001-01-6	0.53817	0.550218	0.98022	0.978536
BRD-K08123737-001-01-5	1.03514	0.996789	0.942798	0.894449
BRD-K08138659-001-01-7	0.928693	0.716898	0.87572	0.977371
BRD-K08171986-001-01-2	0.556205	0.448172	1.00799	0.76877
BRD-K08246588-001-01-4	0.495049	1.07343	1.05313	1.02107
BRD-K08251038-001-01-0	0.896287	0.716245	0.925806	1.00431
BRD-K08281709-001-01-5	0.674402	0.986636	0.951646	1.03578
BRD-K08306736-001-01-7	1.02319	0.791946	0.947134	1.04697
BRD-K08313341-001-01-0	0.605576	1.77086	0.949077	1.0209
BRD-K08322137-001-01-9	1.0875	0.746392	0.929683	1.02523
BRD-K08323222-001-01-3	0.600054	0.445051	0.895119	0.979716
BRD-K08364413-001-01-6	0.721551	0.940621	0.954632	1.03308
BRD-K08373530-001-01-5	1.71128	0.972715	0.871527	1.06856
BRD-K08377525-001-01-3	1.22965	0.912897	0.886653	0.891537
BRD-K08378202-001-01-1	0.858009	0.948065	0.888169	0.882738
BRD-K08403247-001-01-4	0.78524	0.749943	0.922526	1.01715
BRD-K08406207-001-01-5	1.06234	1.2921	0.925704	1.01906
BRD-K08412560-001-01-4	0.69022	0.972678	1.01933	1.13482
BRD-K08436070-001-01-6	1.18209	0.896644	0.885013	0.943617
BRD-K08446710-001-01-1	0.516205	0.736146	0.898844	0.60001
BRD-K08464293-001-02-7	1.47671	0.885546	0.946938	1.03389
BRD-K08465510-001-01-3	0.328339	0.677149	0.963521	1.02904
BRD-K08468228-001-01-0	0.631782	0.630084	0.952222	1.09543
BRD-K08472586-001-01-8	0.480667	0.658051	0.915214	0.935104
BRD-K08478398-001-01-3	0.961457	0.668888	0.905521	1.00176
BRD-K08502366-001-01-8	0.996703	1.29185	1.01618	0.819762
BRD-K08504446-001-01-8	1.38138	0.667353	0.936462	0.981555
BRD-K08512919-001-01-9	1.12065	0.733461	0.968342	1.06415
BRD-K08558441-001-01-9	0.595094	0.892556	0.918147	0.695524
BRD-K08570368-001-01-3	0.654294	0.460792	1.00285	0.741751
BRD-K08581686-001-01-5	0.8027	0.769244	0.991215	1.00871
BRD-K08589195-001-02-0	0.948199	1.02811	0.882762	1.0082
BRD-K08601753-001-01-9	1.26509	1.02986	0.974009	0.95561
BRD-K08612045-001-02-2	0.752349	1.01023	0.937459	1.01419
BRD-K08642789-001-01-1	0.63056	0.494034	0.973796	0.686291
BRD-K08663380-001-01-0	0.634761	1.69416	1.17483	1.06022
BRD-K08665528-001-01-8	1.07268	0.793304	0.941402	0.907992
BRD-K08668362-001-01-1	0.730264	0.877876	0.954923	0.905437
BRD-K08679592-001-01-0	0.932487	0.677479	0.857004	0.617683
BRD-K08703292-001-01-1	0.781593	0.557165	0.97875	0.900945
BRD-K08706435-001-01-2	0.800166	0.71666	0.753638	0.931924
BRD-K08722369-001-01-9	0.694993	0.796512	0.909721	0.963964
BRD-K08725381-019-01-8	0.742667	0.764925	0.970304	1.08398
BRD-K08730634-001-01-1	1.0098	1.12583	0.915204	0.971685
BRD-K08731287-001-01-9	1.32485	1.35861	1.056	1.08816
BRD-K08753531-001-01-7	0.794375	0.972036	0.919241	0.806877
BRD-K08755477-001-01-8	0.924686	1.24828	0.988554	1.06043
BRD-K08756773-001-01-7	0.681758	0.864765	0.952969	0.994614
BRD-K08760804-001-01-2	0.73968	1.20483	0.932335	0.909642
BRD-K08770368-001-01-9	1.02231	1.15973	0.9277	1.06204
BRD-K08798850-001-01-5	0.48823	0.535974	0.891951	1.02444
BRD-K08805764-001-01-3	1.05947	0.746627	0.939817	0.958627
BRD-K08835308-001-01-3	0.991219	1.13931	0.925546	1.04154
BRD-K08839796-001-01-4	0.609316	1.3785	0.849501	1.02755
BRD-K08851690-001-01-6	1.03195	0.938014	0.931567	0.994659
BRD-K08852751-001-01-0	0.935926	0.941545	0.936829	0.618629
BRD-K08858689-001-01-4	0.470968	1.02436	0.908115	0.852064
BRD-K08884986-001-01-0	0.701765	0.735399	0.796517	0.954138
BRD-K08906770-001-01-1	1.13196	1.1634	1.00749	1.03101
BRD-K08936794-001-01-0	1.05876	0.982976	0.953375	0.91899
BRD-K08945503-001-01-3	0.789534	1.17607	0.990601	1.08843
BRD-K08947755-001-01-4	1.01989	0.901747	0.979381	1.01961
BRD-K08963966-001-01-6	0.600699	1.08352	0.920723	1.05879
BRD-K08982647-001-01-3	0.68731	0.499305	0.903835	0.983287
BRD-K08984836-001-01-0	1.3033	1.03017	0.955529	0.92429
BRD-K08993600-001-01-5	1.09328	0.78816	0.988481	0.916452
BRD-K08996802-019-01-6	0.84875	1.13929	0.895968	0.82772
BRD-K08999053-001-01-4	1.0741	1.05335	1.01218	1.0245
BRD-K09014535-001-01-9	1.28465	0.48462	0.958647	1.10064
BRD-K09019487-001-01-6	0.699434	0.929674	1.00711	0.930266
BRD-K09023525-001-01-2	0.923574	0.694799	1.02611	0.773257
BRD-K09059658-001-01-5	1.0927	0.594012	0.908144	0.735124
BRD-K09072186-001-01-9	0.942185	1.06509	0.970007	1.11629
BRD-K09081347-001-01-6	0.85768	0.892451	0.8554	0.959485
BRD-K09110452-001-01-4	1.40045	0.376469	0.905424	0.943813
BRD-K09117891-001-01-8	0.991597	0.906542	0.889346	0.920677
BRD-K09126876-001-01-8	0.741037	1.05758	0.851785	1.06876
BRD-K09127590-001-01-1	0.804571	0.842303	0.920981	1.02474
BRD-K09144377-001-01-5	1.10371	0.768149	0.847874	0.971317
BRD-K09152022-001-01-7	1.49037	0.576113	1.02559	1.03631
BRD-K09170549-001-01-3	0.628945	0.732465	0.950641	1.00354
BRD-K09191014-001-01-5	0.963375	1.13634	0.878529	0.992557
BRD-K09203309-001-01-2	0.804556	0.934379	0.896159	0.594432
BRD-K09210489-001-01-9	0.584601	0.673344	0.929354	0.95527
BRD-K09219528-001-01-3	1.1498	0.629426	0.890473	1.02038
BRD-K09242281-001-01-2	1.10682	0.893719	0.882344	0.974547
BRD-K09253654-001-01-8	1.11057	0.926941	0.855563	0.952607
BRD-K09255392-001-01-0	1.43519	0.553114	0.938579	0.649948
BRD-K09261379-001-01-5	0.815994	0.846627	1.04252	1.14361
BRD-K09276254-001-01-3	0.396873	0.291792	0.811985	0.913337
BRD-K09290524-001-01-8	0.650645	0.604767	0.95244	1.07253
BRD-K09292709-001-01-1	0.962187	1.69739	0.884064	1.0198
BRD-K09301754-001-01-4	0.963098	0.58465	0.95766	1.06118
BRD-K09313490-001-01-8	1.32379	0.922648	0.884233	0.994785
BRD-K09324015-001-01-1	0.822954	1.40496	0.907431	0.992345
BRD-K09325707-001-01-1	0.821437	0.471867	0.870886	0.996163
BRD-K09329774-001-01-1	0.386009	0.398693	0.942978	0.875536
BRD-K09335206-001-01-6	0.827102	0.761138	0.993877	1.01489
BRD-K09344309-001-01-4	0.975617	1.23811	0.903056	0.951474
BRD-K09345520-001-01-4	0.62483	0.876786	0.832298	0.964135
BRD-K09346782-001-01-5	0.356463	0.275332	0.742301	0.683481
BRD-K09353174-001-01-7	0.891326	0.230924	0.914573	0.941512
BRD-K09378334-001-01-1	0.55109	1.18904	1.02313	1.04233
BRD-K09388706-001-01-0	0.777695	1.03041	0.920696	1.01968
BRD-K09391346-001-01-0	0.528026	1.02134	0.966292	1.04333
BRD-K09392449-001-01-4	1.19846	0.823783	0.865847	0.991505
BRD-K09402103-001-01-8	0.882533	0.775936	0.908459	1.04485
BRD-K09406565-001-02-8	1.10776	1.40086	0.928543	1.05404
BRD-K09426613-001-01-0	0.949845	1.10908	0.84025	0.992054
BRD-K09444092-001-01-3	0.309926	0.607878	0.911239	0.72565
BRD-K09458434-001-01-0	0.72638	1.23336	0.938043	1.07038
BRD-K09460338-001-01-3	0.514604	0.323438	0.869021	1.05312
BRD-K09468171-001-01-6	1.26535	0.83252	0.911867	0.945721
BRD-K09468861-001-01-1	1.06822	0.874066	0.981274	0.966816
BRD-K09483832-001-01-6	1.30206	1.30224	1.03594	1.09475
BRD-K09503339-001-01-9	0.513316	0.799025	0.856121	0.894758
BRD-K09526594-001-01-0	0.765915	1.04134	0.832761	1.01099
BRD-K09527783-001-01-9	0.786699	0.417055	0.988004	0.690754
BRD-K09530992-001-01-0	0.80465	0.727786	0.90264	1.04795
BRD-K09542523-001-01-3	1.07235	0.853739	0.865633	0.831081
BRD-K09545209-001-01-7	1.19784	1.11263	0.893885	0.88796
BRD-K09551497-001-01-6	0.840786	0.693638	0.977132	0.991523
BRD-K09555199-001-01-8	0.910391	0.9883	1.05161	0.978267
BRD-K09557852-001-01-2	0.696552	1.17218	0.805878	0.977165
BRD-K09563163-001-01-4	0.684519	0.793278	0.988097	1.00038
BRD-K09566801-001-01-5	1.20119	1.01588	0.936038	1.01765
BRD-K09584442-001-01-3	0.943794	1.15059	0.992986	0.970532
BRD-K09620519-001-01-3	0.644121	0.951935	0.863349	0.90519
BRD-K09627172-001-01-6	0.877542	1.17055	0.901461	0.878354
BRD-K09640010-001-01-5	1.02062	0.654096	1.01863	0.952844
BRD-K09649782-001-01-2	0.338475	0.669877	0.974915	1.08037
BRD-K09659319-001-01-3	1.2345	0.929604	0.990138	1.06186
BRD-K09662377-001-02-4	0.916666	1.25938	0.955683	0.997282
BRD-K09670011-001-02-9	0.688465	0.896619	0.909936	0.963457
BRD-K09688062-001-01-1	1.44982	1.19856	0.984147	1.02485
BRD-K09708845-001-01-1	1.15201	0.791793	0.967614	0.977395
BRD-K09716665-001-01-1	0.530885	1.10563	0.921444	0.587315
BRD-K09735053-019-01-3	0.888492	0.843345	0.912711	1.05125
BRD-K09735779-001-01-4	1.42736	1.09686	0.985108	1.02107
BRD-K09762475-001-01-5	0.605756	0.680916	0.989139	0.788415
BRD-K09767767-001-01-1	0.496855	0.232764	0.913955	1.03552
BRD-K09790760-001-01-0	0.00805782	0.445962	1.05635	0.603906
BRD-K09796735-001-01-9	0.862628	0.882992	0.780012	0.899391
BRD-K09825696-001-02-1	0.742468	0.615705	0.917338	0.993584
BRD-K09852122-001-01-1	0.908195	0.72491	0.960652	0.779861
BRD-K09863466-001-01-2	0.737344	1.42792	0.851409	0.969562
BRD-K09875820-001-01-7	0.61387	0.623132	0.735912	0.995355
BRD-K09906202-001-01-8	1.43362	1.03715	0.943531	0.919436
BRD-K09908582-001-01-4	0.624412	1.08999	0.968641	0.984461
BRD-K09922076-001-01-8	1.50644	1.09267	1.00168	0.98617
BRD-K09935385-001-01-6	0.842364	1.13171	0.91799	1.0439
BRD-K09964916-019-01-6	0.571082	1.02983	0.968033	1.05331
BRD-K09995674-001-02-8	0.693188	0.976344	0.944324	1.04806
BRD-K10000091-001-01-1	1.01011	1.17676	0.969769	0.993146
BRD-K10001878-001-01-8	0.811907	0.755312	0.969408	0.923916
BRD-K10006632-001-01-4	0.769973	1.02651	0.984023	1.15861
BRD-K10011870-001-01-5	0.627602	1.12218	0.861097	0.95333
BRD-K10046096-001-01-9	0.722443	1.06257	0.954438	0.908134
BRD-K10055064-001-02-6	0.959425	0.493758	0.939124	0.99919
BRD-K10064333-001-01-5	0.632615	0.661406	0.985938	0.891842
BRD-K10078763-001-01-4	0.279428	0.325056	0.828727	0.96414
BRD-K10087503-001-01-0	0.988601	0.914163	0.936558	1.03722
BRD-K10089781-004-02-1	0.112152	0.243474	0.950858	1.00308
BRD-K10133460-001-01-3	1.20728	0.517894	1.01687	0.962273
BRD-K10180613-001-01-0	0.625347	0.85816	0.930715	1.03571
BRD-K10182664-001-01-4	0.944079	0.9177	0.875577	1.03683
BRD-K10196668-001-01-0	0.567126	0.920647	0.934366	1.06499
BRD-K10206633-001-01-9	0.643061	1.50776	0.819638	0.699151
BRD-K10234874-001-01-9	0.783703	0.52362	0.987107	0.997095
BRD-K10263431-001-01-4	0.419849	0.653622	0.811178	0.957783
BRD-K10267970-001-01-2	1.0138	1.30955	1.04714	1.05928
BRD-K10268154-001-01-8	1.14319	1.02725	0.961525	1.08645
BRD-K10275508-001-01-6	1.2226	1.20951	1.01455	0.954992
BRD-K10275859-001-01-1	0.929846	1.34864	0.934618	0.919356
BRD-K10279202-001-01-7	0.976617	0.79057	0.840323	0.929974
BRD-K10279767-001-01-4	0.561217	0.605109	0.93142	0.679337
BRD-K10287818-001-02-4	0.632573	0.442551	0.924799	1.00538
BRD-K10299971-001-01-4	0.965899	0.979703	0.831025	0.98722
BRD-K10300086-001-01-2	0.939558	0.920896	0.834117	0.981153
BRD-K10302728-001-01-2	0.881496	0.62065	1.05457	1.07578
BRD-K10303270-001-01-2	0.670309	1.10117	0.918445	1.0523
BRD-K10307250-001-01-7	0.563823	0.625573	0.947794	1.0426
BRD-K10327449-001-01-7	0.79743	0.370696	0.909971	0.562382
BRD-K10342111-001-01-3	1.31915	0.962943	0.867457	1.01108
BRD-K10372036-019-01-4	0.713749	0.93904	1.0153	1.03138
BRD-K10380905-001-01-3	1.02383	0.755169	1.06363	0.993824
BRD-K10412976-001-01-8	0.813859	1.15932	0.869103	0.785382
BRD-K10417524-001-01-4	0.408354	0.621403	1.00741	0.697166
BRD-K10422753-001-01-6	0.954136	0.594302	0.887585	0.978264
BRD-K10424779-001-01-2	0.668548	0.803325	0.903695	1.02431
BRD-K10446065-001-01-8	0.925566	1.03303	1.00556	1.05868
BRD-K10448296-001-01-5	1.01402	0.810135	0.975467	1.07254
BRD-K10457105-001-01-7	0.902466	0.711128	0.922444	0.713697
BRD-K10469936-001-01-7	0.933016	0.511872	0.949086	0.882756
BRD-K10483446-001-01-1	0.731966	0.976652	0.943831	0.945101
BRD-K10493363-001-01-9	0.718158	0.709178	0.861136	0.885157
BRD-K10495567-001-01-8	1.08776	0.998849	0.846497	0.950358
BRD-K10513366-001-01-1	1.23504	0.869872	0.85265	0.895867
BRD-K10562742-001-01-3	1.243	0.782942	0.94247	0.843894
BRD-K10578850-001-01-7	1.09299	0.420119	0.926509	0.792095
BRD-K10589286-001-01-8	0.767472	0.800285	0.869595	1.02521
BRD-K10593696-001-01-4	0.786962	0.682793	0.975549	0.807418
BRD-K10601851-001-01-6	0.75265	0.869131	0.89577	0.980368
BRD-K10621139-001-01-8	0.934053	1.2471	1.0008	1.0204
BRD-K10634221-001-01-0	0.581572	0.474072	0.873485	0.742409
BRD-K10650866-001-01-6	0.699805	0.670322	0.892475	0.934195
BRD-K10657952-001-01-6	1.2244	0.520458	0.944356	1.02774
BRD-K10659178-001-01-0	1.16511	0.952168	0.937232	0.927118
BRD-K10673046-001-01-1	1.57855	0.688002	0.88612	0.72897
BRD-K10687411-004-01-2	1.15929	0.706416	0.898492	0.858825
BRD-K10701803-001-01-3	1.06495	0.747321	0.892226	0.954623
BRD-K10702894-001-01-1	0.668517	0.924813	0.924963	1.02156
BRD-K10712225-001-01-0	0.454757	0.884182	0.936756	0.519698
BRD-K10716948-001-01-7	0.939544	1.14341	0.806999	0.971507
BRD-K10724698-001-03-9	1.31537	0.823913	1.10041	0.936941
BRD-K10743257-001-01-6	0.888546	0.790581	0.886645	0.958165
BRD-K10749532-001-01-0	0.974889	0.931697	0.94955	0.954
BRD-K10756971-001-01-3	0.756715	0.768513	0.869935	0.890183
BRD-K10762823-001-01-1	0.654757	0.567533	0.938806	0.829046
BRD-K10775155-001-01-1	1.13875	0.660713	0.985735	0.89388
BRD-K10776934-001-01-7	1.20303	1.34401	0.832014	1.07736
BRD-K10777286-001-01-9	0.393203	0.884584	0.889683	1.03064
BRD-K10783812-001-01-0	0.842122	0.956832	0.91966	0.984282
BRD-K10788138-001-02-4	1.17587	1.17058	0.981419	0.978361
BRD-K10804522-001-01-5	1.04504	0.993217	0.977019	1.00414
BRD-K10812033-001-01-0	0.881435	0.597316	0.930578	0.891939
BRD-K10813758-001-01-1	0.62212	0.646007	0.899186	0.957301
BRD-K10821756-001-01-6	0.328618	1.21936	0.981233	1.12002
BRD-K10835760-001-01-0	0.737051	1.05063	0.936573	1.04094
BRD-K10837204-001-01-0	0.886017	0.863616	0.911704	1.02373
BRD-K10839747-001-01-0	0.717443	0.812979	0.887791	1.02184
BRD-K10844902-001-01-1	1.03467	0.876273	0.890955	0.871609
BRD-K10845692-001-01-2	0.936076	0.825061	0.857417	0.981962
BRD-K10847374-001-01-3	0.820433	1.22964	0.835155	1.01005
BRD-K10848552-001-01-5	0.291877	0.678366	0.932392	0.556021
BRD-K10849007-001-01-4	0.956403	0.495787	0.909778	0.974023
BRD-K10858021-001-01-7	0.803312	0.807542	1.0202	0.977701
BRD-K10874070-001-01-4	0.825065	1.16849	0.822007	0.968575
BRD-K10879673-001-01-4	0.920588	0.959648	0.896629	0.928985
BRD-K10885227-001-01-2	1.37141	0.879312	0.942117	0.922825
BRD-K10893370-001-01-1	1.26593	0.985981	0.978773	0.881544
BRD-K10893406-001-01-9	0.904975	0.763373	0.951777	0.769951
BRD-K10894258-001-01-6	0.688644	1.3211	0.949668	1.02935
BRD-K10904821-001-01-1	0.610183	0.992565	0.92075	0.922728
BRD-K10909908-001-01-6	1.18292	0.59449	1.02624	1.05275
BRD-K10913188-001-01-9	0.938218	1.06801	0.877698	1.00567
BRD-K10924355-001-01-3	0.905789	0.764444	0.912466	1.06466
BRD-K10926103-001-01-3	1.18703	0.422222	1.13011	0.871023
BRD-K10927790-001-01-9	0.523577	0.632707	0.886554	1.00718
BRD-K10937407-001-01-3	0.944677	0.535928	0.958689	1.00576
BRD-K10944526-001-01-5	0.454733	0.767325	0.833227	0.963753
BRD-K10954923-001-01-3	1.02817	0.726576	0.935408	0.994371
BRD-K11010670-001-01-8	0.848181	1.08994	0.895243	0.959564
BRD-K11022579-001-01-5	0.464721	0.867925	0.918733	1.0312
BRD-K11022796-001-01-2	0.816543	0.888686	0.947605	0.975684
BRD-K11047354-001-01-3	0.762261	0.80109	0.990003	0.77331
BRD-K11054980-001-01-1	1.13079	1.24427	0.988116	0.983955
BRD-K11062991-001-01-1	0.827857	1.16809	0.831579	0.930508
BRD-K11068374-001-01-5	0.870933	0.812597	0.906027	0.948689
BRD-K11071467-001-01-7	0.830401	0.976418	0.973766	0.672842
BRD-K11075695-001-01-2	0.760493	1.24895	0.926553	0.982017
BRD-K11093795-001-01-4	0.900957	1.26841	0.826678	0.954116
BRD-K11110309-001-02-3	0.534797	1.00302	0.832817	1.00495
BRD-K11112621-001-01-2	0.649599	0.830139	1.00973	1.06745
BRD-K11115757-001-01-1	1.26936	1.30539	0.924058	0.982248
BRD-K11120091-001-01-6	0.785688	0.517117	0.99163	0.896402
BRD-K11131032-001-01-5	1.02548	1.13634	0.875208	0.990415
BRD-K11131113-001-01-7	0.985835	1.30663	0.920351	0.908483
BRD-K11141556-001-01-0	0.543893	0.379281	1.0024	0.677411
BRD-K11142347-001-01-2	0.544704	0.611643	0.879018	0.957342
BRD-K11144279-001-01-0	0.613585	1.19903	0.892586	1.0286
BRD-K11159883-001-01-6	0.854698	0.743795	0.977613	0.75528
BRD-K11171096-001-01-4	0.033684	1.00334	0.937983	1.05802
BRD-K11180501-001-01-4	0.98612	1.05683	0.989254	0.613823
BRD-K11198350-001-01-8	1.04067	0.601909	0.911826	0.917558
BRD-K11219023-001-01-9	1.09102	1.05305	0.880297	1.02272
BRD-K11238082-001-01-7	0.808413	0.581039	1.00314	0.744482
BRD-K11247495-001-01-9	0.476087	0.644263	0.904922	1.02332
BRD-K11269634-001-01-5	0.888568	0.650865	1.0229	1.11524
BRD-K11279988-001-01-6	0.870693	1.44205	0.976054	0.895131
BRD-K11286828-001-01-5	1.06877	0.990686	0.934641	0.967506
BRD-K11287975-001-01-4	0.966421	1.1802	1.0377	1.04047
BRD-K11293573-019-01-0	0.526703	0.940316	0.919642	0.556139
BRD-K11295741-001-01-0	1.20665	1.05011	0.856723	0.907206
BRD-K11296387-001-01-7	1.20324	0.385133	0.943456	0.960884
BRD-K11300544-001-01-7	1.02171	0.791835	0.936493	0.993744
BRD-K11309655-001-01-3	0.411689	0.280968	0.903204	0.846003
BRD-K11310449-001-01-2	0.760013	0.870838	0.921413	0.96712
BRD-K11314042-001-01-5	0.850351	0.50611	0.956968	1.09348
BRD-K11327181-001-01-8	1.16858	0.648574	1.06605	0.999996
BRD-K11328501-001-01-9	0.594721	1.08318	0.856754	1.04624
BRD-K11331752-001-01-9	0.720454	1.36609	0.852234	0.976933
BRD-K11343720-001-01-3	1.23437	0.359611	0.975371	0.911482
BRD-K11350821-001-01-6	0.99053	0.961958	0.934654	0.998084
BRD-K11350977-001-01-8	0.255664	1.1339	1.03391	0.650067
BRD-K11360886-001-01-7	1.02219	0.736575	0.893268	0.960996
BRD-K11372228-001-01-9	0.844156	0.612822	1.16403	0.962659
BRD-K11381079-001-01-0
BRD-K11382134-001-01-1	0.930571	0.727005	0.911138	1.08491
BRD-K11392157-001-02-0	0.955443	0.934212	0.900387	0.94894
BRD-K11404512-001-01-5	0.675067	0.678907	0.875484	1.07764
BRD-K11407763-001-02-2	0.943458	0.418121	0.928823	0.840523
BRD-K11415638-001-01-0	0.693746	0.805791	0.923729	1.04069
BRD-K11424789-001-01-9	1.09426	0.631498	0.854468	0.993893
BRD-K11426579-001-01-8	0.749941	0.719412	1.00183	0.899158
BRD-K11432015-001-01-8	1.31769	1.08301	0.982775	0.895488
BRD-K11432829-001-01-4	0.379717	0.157652	0.874721	0.97701
BRD-K11457033-001-01-3	0.821592	0.335302	1.01394	0.712483
BRD-K11468634-001-01-3	0.849924	0.90589	1.01059	1.02698
BRD-K11468724-001-01-4	0.929486	1.50481	0.924842	0.80954
BRD-K11475948-001-01-9	1.23605	0.906706	1.00161	0.877045
BRD-K11480555-001-01-3	1.07452	1.04121	0.974528	0.7372
BRD-K11498433-001-01-3	0.571103	0.671284	0.990607	0.974875
BRD-K11521349-001-01-5	0.701933	0.72025	0.985988	0.917694
BRD-K11549912-001-01-3	1.6183	1.13519	0.992725	0.951861
BRD-K11552298-001-02-9	1.05929	1.07179	0.956866	1.00731
BRD-K11566982-001-02-0	0.486985	0.569506	0.873702	0.702089
BRD-K11577993-001-01-6	0.520676	0.64693	0.952224	1.07764
BRD-K11580678-001-01-2	0.599337	1.00226	0.832747	0.758413
BRD-K11602759-001-01-6	1.16628	1.01099	0.975135	0.834281
BRD-K11609893-001-01-8	0.730449	1.31753	0.893752	0.944924
BRD-K11615943-001-01-5	1.25246	1.44276	0.972556	0.981433
BRD-K11617328-001-01-6	1.23586	0.837107	0.877691	0.943872
BRD-K11625057-001-01-6	0.488697	1.46502	0.866419	0.885225
BRD-K11628545-001-01-0	0.54387	0.347147	1.06149	0.903336
BRD-K11647675-001-01-2	0.944196	0.528847	0.945994	1.01325
BRD-K11667974-001-01-8	0.923186	0.810268	0.913282	0.906096
BRD-K11675166-001-01-9	0.942562	0.524568	0.879461	0.715557
BRD-K11677408-001-01-3	0.868678	0.876118	0.916688	0.986725
BRD-K11687703-001-01-4	0.995494	0.801923	0.905257	0.661937
BRD-K11689127-001-01-8	1.42449	1.05038	1.03576	1.08757
BRD-K11708678-001-01-9	0.658731	1.13152	0.951168	0.898925
BRD-K11710338-001-01-7	0.845186	0.692001	0.99746	1.01423
BRD-K11719436-001-01-9	0.816694	0.746091	0.909894	0.702855
BRD-K11726285-001-01-6	1.07769	0.826425	0.900836	1.03008
BRD-K11742792-001-01-9	0.883153	0.827773	0.87078	0.881916
BRD-K11799866-001-01-0	1.06326	1.11133	0.891373	1.0494
BRD-K11833731-001-01-0	0.692342	1.14587	0.947768	1.00739
BRD-K11834004-001-01-8	0.863786	0.848245	0.98644	0.977829
BRD-K11836564-001-01-5	0.955847	1.03756	1.01511	1.01321
BRD-K11840410-001-01-3	1.05089	0.99214	0.92173	1.04414
BRD-K11857988-001-01-9	0.675956	1.20702	0.931689	0.981122
BRD-K11859908-001-01-2	0.77881	0.698267	0.994613	0.836241
BRD-K11873858-001-01-3	0.566798	0.677847	0.948781	0.802805
BRD-K11880555-001-01-4	0.643869	0.62176	1.01524	1.06884
BRD-K11901207-001-01-0	0.55446	0.813993	1.01362	1.04192
BRD-K11911738-001-01-7	0.476927	0.512414	0.945293	0.999433
BRD-K11911764-001-01-4	0.240251	0.535991	0.929482	1.13511
BRD-K11913456-001-01-3	1.3509	1.21843	0.936745	0.996354
BRD-K11914584-001-01-6	0.896777	0.712329	0.973017	0.913814
BRD-K11919452-001-01-4	0.379591	0.973548	0.990425	0.601427
BRD-K11923178-001-01-9	0.606161	0.549003	0.917456	0.938175
BRD-K11924365-001-01-0	0.354027	1.44567	0.871299	0.949457
BRD-K11926553-001-01-7	0.876762	0.761928	0.924744	0.89477
BRD-K11932360-001-01-8	1.12537	0.832387	0.976982	0.958096
BRD-K11941439-001-01-6	0.727678	0.946675	0.868426	0.893653
BRD-K11942187-001-01-8	0.729827	1.02322	0.981439	1.07161
BRD-K11942325-001-01-1	0.948792	0.884918	0.994728	1.05838
BRD-K11943480-001-01-0	0.621122	0.766182	0.945943	0.944773
BRD-K11957915-001-01-5	0.835685	0.899743	0.956604	0.939238
BRD-K11972820-001-01-8	0.843476	1.34397	1.03348	0.835497
BRD-K11972877-001-01-0	1.38146	1.13707	0.969264	0.827562
BRD-K11980938-001-01-0	0.663631	1.00829	0.916498	0.712417
BRD-K11988449-001-01-5	1.26892	1.47373	1.02925	0.997553
BRD-K11989341-001-01-2	0.733799	0.715295	1.03185	0.766001
BRD-K11992628-001-01-0	1.0374	0.987027	0.997341	1.02782
BRD-K12002747-001-01-3	0.620247	1.3226	0.9927	1.04823
BRD-K12013190-001-01-2	0.741611	0.660459	0.956273	0.997479
BRD-K12027235-019-01-1	0.50915	0.756232	0.96673	1.10469
BRD-K12034365-001-01-7	1.20217	1.17188	0.852687	0.959371
BRD-K12067499-001-01-6	0.56095	0.513931	0.8475	0.877455
BRD-K12124649-001-01-4	0.817519	0.770782	0.91269	1.0593
BRD-K12126940-001-01-5	1.0139	1.0837	0.966184	0.454553
BRD-K12148366-001-01-4	0.835287	0.954624	0.918458	0.989966
BRD-K12154461-001-01-6	1.39508	1.0463	0.858354	0.859445
BRD-K12160409-001-01-8	0.61798	0.579562	0.885417	1.02983
BRD-K12179750-001-01-3	0.850144	0.81144	0.902436	0.993246
BRD-K12227848-001-01-4	0.900004	1.64414	0.867283	1.03611
BRD-K12236620-001-01-9	0.408611	1.09641	0.904566	1.01919
BRD-K12241427-001-01-4	0.714479	1.12751	1.0191	1.04197
BRD-K12257037-001-01-2	0.181774	1.0108	0.914642	0.973285
BRD-K12272248-001-01-6	0.480244	0.951201	1.01938	0.913357
BRD-K12274601-001-01-3	0.867055	0.773579	1.00851	1.06964
BRD-K12278014-001-01-5	0.913663	0.52337	0.882599	1.03723
BRD-K12279679-001-02-7	1.30756	0.609965	0.9508	1.01942
BRD-K12286219-001-01-1	0.95999	1.21635	0.962005	0.958126
BRD-K12299334-001-01-4	0.98665	1.26589	0.868515	0.918333
BRD-K12302379-001-01-2	0.911432	0.899685	0.903468	0.997276
BRD-K12304111-001-01-1	1.312	0.806274	0.910507	0.916673
BRD-K12309761-001-01-3	0.688203	0.92121	1.01838	0.932806
BRD-K12313969-001-01-5	0.930621	1.05954	0.957804	1.06946
BRD-K12313989-001-01-1	1.05196	0.883611	0.913668	0.955285
BRD-K12341671-001-01-5	0.931605	0.73577	0.807834	0.965937
BRD-K12346112-001-01-1	1.20141	1.02256	0.951685	0.945075
BRD-K12365616-001-01-2	0.91768	1.05467	0.970359	0.939061
BRD-K12380756-001-01-1	0.897424	0.854558	1.03246	0.940075
BRD-K12395425-001-01-0	0.88999	1.1367	1.08839	0.824289
BRD-K12400889-001-01-7	0.646098	0.982381	0.856367	0.996024
BRD-K12405591-001-01-5	0.478398	0.811894	0.957055	0.875341
BRD-K12412152-001-01-2	0.680889	0.341843	0.904687	0.997348
BRD-K12415987-001-01-6	0.466123	0.429502	1.00295	0.629232
BRD-K12425451-001-01-2	0.536784	0.694288	0.92395	1.03404
BRD-K12441550-001-01-9	0.726532	1.15501	1.02304	0.747126
BRD-K12450081-001-01-8	0.778806	1.532	0.823122	0.965401
BRD-K12456310-001-01-8	1.09522	0.841991	0.831754	0.932689
BRD-K12483497-001-01-7	0.682812	1.0617	0.968727	1.02552
BRD-K12484704-001-01-4	0.518182	1.04269	0.878676	1.00968
BRD-K12497208-001-01-7	0.373194	0.512646	0.91404	0.684363
BRD-K12513087-001-01-7	0.891947	0.897557	0.859221	0.935294
BRD-K12518223-001-01-1	1.00177	0.230735	1.14568	1.09884
BRD-K12524159-001-01-7	1.22487	0.766898	0.83523	0.829689
BRD-K12528779-001-01-8	0.827669	0.712675	0.918494	0.972573
BRD-K12534235-001-01-4	0.926178	1.34675	0.942213	0.90905
BRD-K12562048-001-01-2	1.01168	1.43403	0.91808	1.02312
BRD-K12573098-001-01-8	0.502647	1.20015	0.886552	0.989856
BRD-K12600154-001-01-0	0.960075	1.05635	0.903299	0.970751
BRD-K12604570-019-01-0	0.882262	0.819634	0.974482	1.08404
BRD-K12605287-001-01-9	0.798111	0.94022	0.979107	1.01778
BRD-K12612468-001-01-6	1.07026	1.31981	0.966949	1.09482
BRD-K12623669-001-01-0	0.678303	0.586905	0.888215	0.962714
BRD-K12654187-001-01-8	0.790515	1.19704	0.929811	0.953517
BRD-K12655851-001-01-0	0.635034	1.38869	0.976976	1.02788
BRD-K12663531-001-02-0	0.63093	0.466969	0.935505	0.984143
BRD-K12676148-001-01-9	0.592902	0.954169	0.954461	1.05094
BRD-K12678780-001-01-8	0.896601	0.827193	1.0171	1.02035
BRD-K12682252-001-01-9	0.847687	0.691598	1.00605	1.06684
BRD-K12695722-001-01-3	0.560673	1.16754	0.95896	0.923123
BRD-K12696543-001-01-8	0.95033	0.673455	1.00005	0.923548
BRD-K12729417-001-01-0	0.778104	1.22064	1.00411	1.12078
BRD-K12730901-001-01-1	0.739981	0.81517	0.931894	0.988317
BRD-K12743465-001-01-2	0.998336	0.577022	0.961169	0.662273
BRD-K12744550-019-01-8	0.50201	0.623361	0.939626	0.536322
BRD-K12757863-001-04-4	0.810131	0.918226	0.979616	1.03402
BRD-K12776385-001-01-9	1.08592	1.25702	0.945694	1.01328
BRD-K12777289-001-01-4	0.943743	1.17587	0.988327	1.04697
BRD-K12807496-001-01-8	0.743029	0.908251	0.871877	0.874133
BRD-K12858756-001-01-6	0.812889	0.838809	0.892187	0.932098
BRD-K12862164-001-01-4	0.937931	1.12708	0.988404	1.03145
BRD-K12868556-001-01-7	0.847627	0.557203	0.95275	0.58701
BRD-K12870585-001-01-8	1.17027	0.517551	1.0291	1.15953
BRD-K12873492-001-01-4	0.925481	0.456171	0.897925	0.98184
BRD-K12874043-001-02-4	0.813774	0.842547	0.954422	0.97961
BRD-K12880737-001-02-2	0.59785	0.859071	0.913569	0.996652
BRD-K12892167-001-01-8	0.940632	1.09692	0.701174	0.94085
BRD-K12907790-001-01-9	1.00465	0.815996	0.91204	0.762623
BRD-K12911166-001-01-7	0.920759	1.08621	0.928008	0.971601
BRD-K12912249-001-01-6	0.899616	0.796415	0.910552	1.04206
BRD-K12920147-001-01-2	0.695881	1.38464	1.00185	1.09773
BRD-K12932375-001-01-0	0.773696	0.917463	0.896283	0.948513
BRD-K12951693-001-01-5	0.781141	0.804547	1.03475	1.07251
BRD-K12961950-001-01-2	1.01176	0.782156	0.968826	1.06203
BRD-K12962746-001-01-9	0.591942	0.981815	0.989138	0.99547
BRD-K12968907-001-01-1	0.850827	0.644557	1.02112	0.725858
BRD-K12970833-001-01-6	0.871254	0.527511	0.835561	0.981186
BRD-K12974237-001-02-8	1.22442	0.917869	0.979044	1.04112
BRD-K13000360-001-01-2	0.802284	1.44042	0.900322	1.02666
BRD-K13001376-001-01-2	0.481442	1.16605	0.955379	0.788401
BRD-K13005651-001-01-9	0.756855	0.919447	0.981822	0.954911
BRD-K13010509-001-01-3	0.451488	0.326836	1.02309	1.1276
BRD-K13013827-001-01-2	0.860517	1.04259	0.919898	0.993025
BRD-K13023558-001-01-6	1.27524	0.928079	0.904474	0.97928
BRD-K13036885-001-01-2	0.81923	0.876426	0.824886	1.02852
BRD-K13059702-001-01-5	1.10847	0.488355	0.958166	0.986703
BRD-K13064257-001-01-4	0.815969	0.789066	0.891842	0.985021
BRD-K13087002-001-01-3	0.82461	0.602156	0.848248	0.954336
BRD-K13089870-001-01-8	1.33812	0.899398	0.947278	0.882767
BRD-K13089873-001-02-3	0.676239	0.800081	0.961341	0.605521
BRD-K13097828-001-01-4	0.794357	1.08983	0.92358	1.06782
BRD-K13109628-001-01-9	0.0603378	0.607216	1.00231	1.04167
BRD-K13116312-001-01-5	1.11937	0.626035	0.930574	0.799018
BRD-K13125436-001-01-7	0.723125	0.328609	0.941648	0.99175
BRD-K13133968-001-02-5	1.21681	1.23406	0.83614	0.961626
BRD-K13150695-001-01-1	0.438547	0.465648	0.931834	0.944153
BRD-K13162802-001-01-6	0.608438	0.923378	0.827172	0.973985
BRD-K13199470-001-01-9	0.659262	1.34232	1.02422	1.04371
BRD-K13207880-001-01-4	0.892657	0.549092	0.991528	0.994083
BRD-K13212502-001-01-2	0.34105	0.789764	0.976876	0.493313
BRD-K13232634-001-01-1	1.10968	0.810494	1.01824	1.08794
BRD-K13234528-001-01-6	0.398528	0.267048	0.841379	0.917776
BRD-K13248287-001-02-5	1.20453	0.543289	0.954598	1.04659
BRD-K13258766-001-01-6	0.450217	0.617877	0.804	1.0592
BRD-K13267130-001-01-6	0.887483	0.917935	0.959465	0.911662
BRD-K13290469-001-01-9	1.22829	1.00285	0.924844	0.91943
BRD-K13307050-001-01-6	1.08419	1.42421	0.933915	1.08754
BRD-K13307254-001-01-0	0.5729	1.28552	0.937285	0.997672
BRD-K13319963-004-02-9	1.2405	1.09163	0.918755	0.993486
BRD-K13325617-001-02-2	0.70146	0.971951	0.870654	0.950561
BRD-K13336710-001-01-7	0.707417	0.91063	0.909335	0.731962
BRD-K13341127-001-01-4	1.04611	0.576895	1.1341	1.03383
BRD-K13355605-001-01-5	0.689624	1.46428	1.01717	1.04393
BRD-K13357679-001-01-2	1.15058	1.03723	0.918524	1.03705
BRD-K13358146-001-02-3	1.05711	0.861732	0.898941	0.952249
BRD-K13383838-001-01-6	1.16821	0.832712	0.919065	0.954967
BRD-K13397963-001-02-1	0.867511	0.434379	1.04248	0.740967
BRD-K13400061-001-01-6	1.01063	0.671347	0.973982	0.923205
BRD-K13400435-001-01-5	0.512816	1.24617	0.968509	0.801831
BRD-K13408229-001-01-8	1.73916	1.11916	1.05332	1.06149
BRD-K13415098-001-01-1	0.976035	0.613593	0.850416	0.970322
BRD-K13415551-001-01-1	0.629444	1.00243	0.972062	1.05301
BRD-K13424476-001-01-5	1.02286	1.36728	0.986075	0.962644
BRD-K13448237-001-01-4	1.10839	1.2235	0.952269	0.952278
BRD-K13480577-001-01-5	0.459366	1.11811	0.9144	1.02163
BRD-K13493162-001-01-9	0.756168	0.590832	0.830506	0.959306
BRD-K13532245-001-01-5	0.644521	0.875379	0.929499	1.07301
BRD-K13534554-001-01-6	0.974661	0.767042	0.937711	0.93746
BRD-K13542161-001-01-4	1.10788	1.02626	0.908448	0.969315
BRD-K13544395-001-01-8	0.809109	0.905499	0.923759	0.996947
BRD-K13559434-001-01-9	0.924429	0.656513	0.939632	0.924733
BRD-K13559922-001-01-8	0.386965	1.06174	0.906309	0.969395
BRD-K13572796-001-01-4	1.17898	0.94443	1.01209	0.686268
BRD-K13582094-001-01-2	-0.010905	0.591826	1.00472	0.60088
BRD-K13583181-001-01-4	0.680906	1.01346	0.932385	1.01186
BRD-K13593076-001-01-1	0.692168	0.46135	0.805451	0.889843
BRD-K13600266-001-01-4	0.546126	0.763027	0.964261	0.804152
BRD-K13624944-001-01-4	1.02674	0.434217	0.97981	0.93681
BRD-K13631947-001-01-6	1.04241	0.939787	0.916546	1.02687
BRD-K13647497-001-01-6	0.86017	1.76031	0.9946	1.01526
BRD-K13648511-001-01-6	0.800141	1.20984	0.849978	0.862886
BRD-K13653700-001-01-7	0.869238	0.634327	0.887707	0.953241
BRD-K13667629-001-01-5	0.804854	0.269369	0.911403	0.766194
BRD-K13673722-001-01-9	0.963265	0.884147	0.877612	0.929239
BRD-K13673853-001-01-0	0.731627	0.508877	0.958358	0.948332
BRD-K13674694-001-01-1	0.99339	0.735878	0.960681	1.04991
BRD-K13688630-001-01-8	0.810797	0.888776	0.894663	0.996606
BRD-K13691358-001-01-2	0.423962	0.690166	0.915991	1.03105
BRD-K13703437-001-01-0	0.482679	0.431934	0.944243	0.556402
BRD-K13717363-001-01-8	0.802003	0.803768	0.99625	0.971281
BRD-K13733523-001-01-2	0.747357	0.818576	0.847711	0.976134
BRD-K13740397-001-01-0	0.866189	0.704741	0.940041	1.07732
BRD-K13746012-001-01-2	0.673891	0.647048	0.945496	1.05479
BRD-K13752834-001-01-6	1.2255	0.624866	0.856702	0.921404
BRD-K13754152-001-01-6	1.18181	0.803395	0.900117	0.720789
BRD-K13757679-001-01-3	1.27859	0.891784	0.896254	0.639288
BRD-K13763910-001-01-0	0.504952	0.963702	0.886803	0.774897
BRD-K13765769-001-01-7	0.801223	0.67954	0.959168	0.966266
BRD-K13765840-001-01-0	0.759767	0.864555	0.974078	1.13218
BRD-K13774281-001-01-8	0.62581	0.866455	0.896141	1.02361
BRD-K13801569-001-01-2	1.17693	1.17614	0.895715	1.12159
BRD-K13815703-001-01-9	0.610255	0.937911	0.909491	0.794763
BRD-K13821048-001-01-1	1.15545	0.928839	0.869988	1.01439
BRD-K13839284-001-01-6	0.301747	0.659415	0.953504	1.05408
BRD-K13839830-001-01-5	0.54318	0.866584	0.921114	1.0208
BRD-K13841636-001-02-5	1.24753	1.10387	0.989029	0.950706
BRD-K13852343-001-01-8	0.994386	1.30744	0.839407	0.994784
BRD-K13860832-001-01-9	1.26736	1.21239	0.859578	0.958906
BRD-K13883913-001-01-3	0.61465	0.743155	0.958375	0.98029
BRD-K13891716-001-01-5	0.981077	0.979156	0.969539	1.0653
BRD-K13941175-001-01-2	0.925978	1.08159	0.916982	0.974536
BRD-K13942440-001-01-9	1.2701	0.638429	0.931684	0.850553
BRD-K13945151-001-02-9	0.546302	0.990755	1.00169	0.647706
BRD-K13982317-001-01-5	1.06555	0.603406	1.06004	0.997834
BRD-K14002526-001-01-8	0.414405	0.103114	0.870051	0.721041
BRD-K14004872-001-01-4	1.15556	0.822281	0.897487	0.85862
BRD-K14009758-001-01-2	1.00913	1.36046	0.959016	1.03345
BRD-K14013483-001-02-4	0.612531	0.648816	1.00073	1.01367
BRD-K14023438-001-01-1	0.695661	1.0946	0.930919	0.984347
BRD-K14032933-001-01-2	1.007	0.958755	0.838859	0.972739
BRD-K14055576-001-01-5	0.662002	0.650872	0.912461	0.944134
BRD-K14056040-001-01-1	1.05833	0.790052	0.988022	0.939619
BRD-K14061746-001-01-8	0.886213	0.849411	0.893074	0.933743
BRD-K14062870-001-01-4	0.950865	0.335697	0.89135	0.89511
BRD-K14065833-001-01-3	0.821257	0.848867	0.961579	1.06579
BRD-K14087339-001-01-6	1.04195	0.871985	0.869478	0.971579
BRD-K14091022-001-01-0	0.714122	1.05022	1.03632	1.02625
BRD-K14095397-001-01-8	1.0385	1.11055	0.83303	0.89461
BRD-K14105953-001-01-1	0.91397	0.747412	0.981508	0.908229
BRD-K14138789-004-01-6	1.42005	1.00806	0.973744	0.893292
BRD-K14139166-001-01-3	1.39969	1.1085	0.82307	0.909237
BRD-K14163651-001-01-5	0.763143	0.642506	0.832019	0.977839
BRD-K14169964-001-01-4	0.535622	0.576804	0.993682	0.980257
BRD-K14193256-001-01-1	0.366599	0.141552	0.211886	0.553405
BRD-K14195731-001-01-1	1.03827	0.773449	0.856058	0.941609
BRD-K14200107-001-01-5	0.744142	1.38552	1.02857	1.13007
BRD-K14217441-001-01-4	0.729707	0.74312	0.907436	1.03334
BRD-K14217854-001-01-4	0.816544	0.657559	0.449222	0.973219
BRD-K14218449-001-01-4	0.673111	1.20731	0.929091	1.02355
BRD-K14223430-001-01-5	0.872461	1.41181	0.981347	1.03211
BRD-K14225517-001-01-6	1.02592	0.795013	0.88575	0.91149
BRD-K14245765-001-01-3	0.704727	0.683795	0.885645	0.842172
BRD-K14246967-001-01-7	0.519928	1.34973	0.907398	0.890397
BRD-K14262987-001-01-0	0.643056	0.752872	0.965602	0.984666
BRD-K14263251-001-01-7	0.843686	0.406154	0.983511	0.682356
BRD-K14267479-001-01-4	0.637628	0.697126	0.905177	1.05547
BRD-K14284102-001-01-4	0.897052	1.16875	0.92482	1.0632
BRD-K14306918-001-01-9	1.03937	0.995637	0.94223	1.00721
BRD-K14307099-001-01-8	1.17233	1.00213	1.0526	1.00383
BRD-K14307849-001-01-1	0.784499	0.79909	0.862284	0.924026
BRD-K14310250-019-01-9	0.621919	0.448784	0.895633	1.08251
BRD-K14328427-001-01-7	1.05388	0.921233	1.06522	1.1003
BRD-K14345213-001-01-9	0.803472	1.26444	0.929899	1.01143
BRD-K14346766-001-01-8	1.18271	0.75296	0.948538	1.01044
BRD-K14350179-001-01-1	0.492361	0.196899	0.957486	0.90389
BRD-K14356875-019-01-7	0.600056	0.459992	0.874433	0.641921
BRD-K14357288-001-01-4	0.844394	0.937829	0.966338	1.03374
BRD-K14376070-001-01-6	0.957363	1.31695	0.919492	0.908445
BRD-K14385562-001-01-2	0.9183	0.536689	0.900236	0.93506
BRD-K14391443-001-02-3	0.777093	1.24746	0.947003	1.01862
BRD-K14396439-001-01-0	0.407086	0.815488	0.897602	1.02443
BRD-K14409255-001-01-2	0.843563	0.938333	0.9195	0.918271
BRD-K14419040-001-01-1	0.730337	0.948003	0.87071	0.935388
BRD-K14428604-001-01-0	0.588875	0.950155	0.890519	0.957958
BRD-K14433433-001-01-7	0.90165	0.84427	0.941866	1.0813
BRD-K14435821-001-01-2	1.02442	0.273285	0.967728	0.962371
BRD-K14436020-001-01-9	1.32979	0.89106	0.923893	1.04298
BRD-K14437503-001-01-3	0.605593	1.0199	0.942966	1.06501
BRD-K14447453-001-01-2	1.27481	1.13498	0.897704	0.954703
BRD-K14468647-001-01-5	0.717963	0.993613	1.00954	0.750421
BRD-K14470344-001-02-5	0.616744	1.00157	0.937534	1.02147
BRD-K14471579-001-01-1	0.652526	0.70971	0.85373	0.961085
BRD-K14471942-001-01-1	0.869109	0.599878	0.853398	0.807827
BRD-K14474387-001-01-7	0.630124	0.962455	0.940741	0.993886
BRD-K14478589-001-01-4	0.902728	0.605293	0.88456	0.948644
BRD-K14483137-001-01-1	0.892453	0.991394	1.01185	0.961207
BRD-K14489740-001-01-7	0.885172	1.45826	0.874042	0.890963
BRD-K14518077-001-01-6	1.09314	0.755302	0.892164	0.950918
BRD-K14525149-001-01-5	0.872248	0.992991	0.954389	1.01338
BRD-K14535500-001-01-7	1.21143	0.548031	0.985259	0.998845
BRD-K14538540-019-01-5	0.531724	0.601685	0.942736	1.05421
BRD-K14564509-001-01-8	0.871441	1.05871	0.998431	1.02618
BRD-K14570271-001-01-1	0.58909	0.416176	0.937054	1.04524
BRD-K14625701-001-01-3	0.91991	0.772217	0.941621	0.956051
BRD-K14631382-001-01-7	0.666442	0.662749	0.954863	1.10585
BRD-K14632804-001-01-5	0.624944	0.632853	0.946101	0.980494
BRD-K14649066-001-01-2	0.799649	1.08109	0.997454	1.13171
BRD-K14652476-001-01-0	0.939784	0.896075	0.952017	0.994845
BRD-K14682754-001-01-0	1.04788	1.46817	0.861536	0.97771
BRD-K14687971-001-01-6	1.15282	0.966573	0.956223	0.8972
BRD-K14695590-001-01-0	0.914866	0.537928	0.904342	0.891383
BRD-K14695950-001-01-4	0.930695	1.09176	0.897957	0.836197
BRD-K14697199-001-01-1	1.06135	0.313736	0.878529	0.85318
BRD-K14697819-001-01-1	0.896227	0.601679	0.97254	0.985495
BRD-K14730656-001-01-6	0.851225	0.87991	0.930926	0.844342
BRD-K14738608-001-01-8	0.892275	0.357193	0.909381	0.837091
BRD-K14744269-001-01-6	1.24456	0.772919	1.02172	1.07786
BRD-K14750918-001-01-8	0.791676	1.03846	0.935826	0.853236
BRD-K14758616-001-01-6	1.04853	0.662368	0.933816	0.601698
BRD-K14763816-001-01-4	0.716608	0.82755	0.913118	0.535445
BRD-K14783598-001-01-6	1.36253	0.567036	0.92576	0.966574
BRD-K14787141-001-01-9	0.722229	1.14547	0.946594	1.00973
BRD-K14826876-001-01-6	0.948039	0.534632	0.976493	1.03047
BRD-K14831193-001-01-2	0.927709	0.96717	0.94021	0.929151
BRD-K14842933-001-01-4	1.14432	0.940092	0.974135	0.965412
BRD-K14868266-001-01-6	0.557883	-0.00324431	1.03246	0.658146
BRD-K14870920-001-01-0	0.926636	0.538743	1.07869	1.00407
BRD-K14886939-001-01-5	0.819591	0.829523	0.980254	0.999627
BRD-K14889526-001-01-8	0.800761	0.372775	0.892122	1.01218
BRD-K14890067-001-01-1	0.758513	0.584536	0.868469	0.937496
BRD-K14919928-001-01-7	0.908691	0.988364	0.886058	1.01218
BRD-K14970242-001-01-9	0.615552	0.706298	0.977491	1.03836
BRD-K14989056-001-01-4	1.09496	1.36911	0.999667	1.1116
BRD-K14992492-001-01-0	0.758156	0.727945	0.983679	0.792892
BRD-K14998923-001-01-6	0.428049	0.735367	0.958425	1.09577
BRD-K15007512-001-01-2	0.863024	0.784721	0.852671	0.928215
BRD-K15014572-001-01-5	0.735525	0.660553	0.895806	1.02983
BRD-K15014883-001-01-9	0.700184	0.921076	0.943361	1.00515
BRD-K15023392-001-01-4	0.763902	0.785507	0.898129	0.956168
BRD-K15029638-001-01-5	0.901748	0.814388	0.969174	0.972047
BRD-K15030037-001-01-0	0.844858	1.02937	0.807893	0.690576
BRD-K15030062-001-01-8	0.768732	1.02183	0.89339	0.911401
BRD-K15042749-019-01-6	0.734958	1.4192	0.957406	1.06794
BRD-K15047429-001-01-0	1.07959	1.24797	1.03305	1.07681
BRD-K15056559-001-01-3	0.608569	0.948371	0.988627	0.949809
BRD-K15076320-001-01-9	0.713223	0.792261	0.943908	1.0841
BRD-K15090836-001-01-7	0.716434	0.851258	0.864072	0.963533
BRD-K15095185-001-01-3	1.21717	0.888973	0.983673	1.0347
BRD-K15098674-001-02-3	1.17714	0.927872	0.88056	1.01482
BRD-K15098810-001-01-0	0.914295	0.520453	0.905706	0.5746
BRD-K15104197-001-01-9	0.827394	0.788043	0.934711	1.05607
BRD-K15104539-001-01-6	0.554339	0.780347	0.9034	0.773742
BRD-K15104969-001-01-5	0.439002	0.842853	1.02172	0.696801
BRD-K15108654-001-01-6	0.419734	0.434026	0.870083	0.820593
BRD-K15168067-001-01-1	0.671057	0.748274	0.935483	1.02096
BRD-K15176462-001-01-5	0.575434	0.888018	0.967539	0.771671
BRD-K15185037-001-01-2	0.934074	0.925924	0.840869	0.957635
BRD-K15187306-001-01-2	1.13496	0.738708	0.922558	0.940232
BRD-K15217027-001-01-5	1.09907	0.982259	0.926857	1.01104
BRD-K15222491-001-01-2	0.871498	0.837114	0.939713	0.982055
BRD-K15224185-001-01-9	0.970551	0.774907	0.956746	0.829363
BRD-K15230829-001-01-8	0.982417	0.69973	0.845392	0.949522
BRD-K15240833-001-01-1	1.2955	0.710032	0.970615	0.981136
BRD-K15245489-001-01-7	1.02738	1.17148	0.990274	0.958372
BRD-K15260875-001-01-8	1.20071	1.11641	0.937707	0.988807
BRD-K15261426-001-01-0	1.00035	0.724601	0.882474	0.889061
BRD-K15290974-001-01-5	1.05883	0.967979	0.95075	0.897672
BRD-K15305719-001-01-1	1.04247	0.939231	0.950836	1.04243
BRD-K15341710-001-01-5	1.11408	1.05655	0.90473	0.857551
BRD-K15365200-001-01-1	1.1362	0.857592	0.874497	0.939194
BRD-K15374927-001-01-5	0.844008	1.10552	0.948883	1.43038
BRD-K15377376-001-01-4	0.931632	0.726037	0.963715	0.940467
BRD-K15384464-001-01-3	0.86929	0.889565	0.954471	1.01145
BRD-K15400067-001-01-8	0.799181	1.05205	0.831678	0.964994
BRD-K15410616-001-01-3	0.594524	0.522141	0.878796	0.915968
BRD-K15419834-001-01-0	0.843916	0.55008	0.833946	0.999349
BRD-K15422621-001-01-1	0.893173	0.742835	0.976113	1.08247
BRD-K15426523-001-01-1	0.517443	0.814381	0.982545	1.0765
BRD-K15427157-001-02-0	1.27072	1.02332	0.992952	0.947976
BRD-K15464148-004-02-9	0.331442	0.595329	0.9477	0.652783
BRD-K15478603-001-01-5	1.08828	0.83022	1.04172	0.949001
BRD-K15485967-001-02-8	0.577407	0.809547	0.990883	0.970929
BRD-K15489726-001-02-2	1.39159	0.924837	0.931363	1.05525
BRD-K15524596-001-01-5	0.697283	0.460075	0.965271	0.983624
BRD-K15525634-004-02-8	0.849267	0.638716	1.05597	0.6467
BRD-K15530151-001-01-9	0.656747	0.830623	0.933194	0.788105
BRD-K15536910-001-01-8	0.765822	0.933663	0.922339	1.08357
BRD-K15547249-019-01-9	0.99651	1.64059	0.900299	0.946032
BRD-K15568896-001-01-9	1.95831	0.817054	0.928357	1.01101
BRD-K15573354-001-01-4	0.744829	1.1124	0.944078	0.873757
BRD-K15577359-001-01-0	1.47008	0.6267	0.99785	1.0499
BRD-K15586786-001-01-4	0.605121	0.559534	0.984352	0.806017
BRD-K15593941-001-01-2	0.894567	0.643487	0.857109	0.9697
BRD-K15594502-001-01-1	1.07066	1.25714	0.918613	1.01903
BRD-K15600521-004-02-5	1.10802	0.926869	0.949489	0.962818
BRD-K15609977-001-01-3	1.13424	0.973902	0.854671	0.955299
BRD-K15610181-001-01-3	0.757664	0.866312	0.955886	1.0388
BRD-K15616642-001-02-1	0.650846	1.0938	1.00619	0.747472
BRD-K15626512-001-01-9	1.4045	1.26516	0.95685	0.930593
BRD-K15650895-001-01-6	0.951505	1.03695	0.932316	0.953761
BRD-K15656985-001-01-4	1.04338	0.77888	1.02081	0.707593
BRD-K15668714-001-01-7	0.88584	1.27416	0.902779	1.01389
BRD-K15684061-001-01-3	0.680644	0.288911	0.890891	0.946358
BRD-K15684312-001-01-0	1.12434	1.36661	0.986974	0.890324
BRD-K15693920-001-01-5	0.930551	1.37802	0.844546	1.06266
BRD-K15695045-001-01-0	1.23222	1.03369	0.977135	1.05847
BRD-K15706160-001-01-4	1.62677	1.12362	1.00946	1.08261
BRD-K15707609-001-01-1	0.967651	1.11816	0.822734	0.919105
BRD-K15711937-001-01-6	0.825721	0.648163	0.978926	1.06672
BRD-K15712294-001-01-1	0.725123	0.751547	0.870247	0.994373
BRD-K15713104-001-02-7	0.745209	1.37404	0.89263	1.03548
BRD-K15752270-001-01-5	0.905844	0.516468	0.916073	0.896289
BRD-K15752674-001-02-5	0.914374	0.831551	0.973696	0.962332
BRD-K15768040-001-01-0	0.991253	0.397416	0.957053	1.01366
BRD-K15769121-001-01-0	0.933904	0.984352	0.972675	1.04751
BRD-K15778794-001-01-7	0.684761	0.765738	0.920106	0.874365
BRD-K15790516-001-01-9	0.705699	0.568301	0.929798	0.727367
BRD-K15793745-001-01-6	0.753263	0.934086	0.918045	0.953082
BRD-K15800236-001-01-5	0.473767	0.443301	0.939552	1.02991
BRD-K15804726-001-01-4	0.757474	0.889028	0.891748	0.808498
BRD-K15819260-001-01-4	0.831982	0.840711	0.910876	0.967569
BRD-K15819393-001-01-4	0.936514	0.880718	0.931281	0.890172
BRD-K15842707-001-01-7	0.230747	0.170867	0.284256	0.325936
BRD-K15852935-001-01-0	1.18931	1.00947	0.966218	0.909275
BRD-K15858225-001-01-6	0.494999	0.596789	0.970189	1.04391
BRD-K15869515-001-01-2	1.09823	1.63502	0.841315	0.910237
BRD-K15882173-001-01-8	0.411632	0.671985	0.964863	1.05698
BRD-K15885089-001-02-2	0.775998	0.704896	0.939012	1.00601
BRD-K15900966-001-01-9	0.621611	0.882422	1.05678	0.951383
BRD-K15928577-001-01-1	1.22384	1.45112	1.10345	0.990542
BRD-K15947000-001-01-8	0.778433	1.25101	1.05141	1.09197
BRD-K15947051-001-01-6	0.825853	0.821488	1.00813	0.935063
BRD-K15950079-001-01-8	1.34754	1.15924	0.983697	0.999635
BRD-K15955205-001-01-4	0.754175	0.911178	0.922489	0.974972
BRD-K15958187-001-01-0	0.761966	1.02249	0.904918	0.973664
BRD-K15961418-001-01-5	0.926878	0.679347	0.871718	0.922086
BRD-K15973523-001-01-2	0.412971	0.908353	0.976153	0.962777
BRD-K15976124-001-01-8	0.693147	0.396565	0.875781	0.728683
BRD-K15979684-001-01-4	0.356695	0.776212	1.0468	1.01299
BRD-K15985619-001-01-1	0.888067	0.988084	0.959961	0.84463
BRD-K16004166-001-02-5	0.350229	0.500897	0.962182	0.879249
BRD-K16014164-001-01-8	0.664637	0.818922	0.926315	0.975779
BRD-K16031223-001-01-1	0.76797	0.783842	0.891597	0.969414
BRD-K16033514-001-01-5	0.702203	0.530547	0.810673	0.677902
BRD-K16043316-001-01-4	0.877203	0.202129	1.09422	0.950569
BRD-K16068142-001-01-1	1.09232	0.380257	1.01425	0.925882
BRD-K16074065-001-01-2	0.817547	0.924592	0.990675	0.734308
BRD-K16080328-001-01-2	0.514481	0.563183	1.04918	0.750434
BRD-K16097209-001-01-0	0.665664	0.657679	0.919403	0.948834
BRD-K16106362-001-01-2	0.867358	0.655192	0.94884	0.649031
BRD-K16120913-001-01-7	0.782007	0.699141	0.84063	0.978429
BRD-K16126971-001-01-3	0.672531	0.908868	0.945807	0.85688
BRD-K16144417-001-01-8	0.985127	0.372906	1.03757	0.998268
BRD-K16149111-019-01-8	0.772424	0.51459	0.931497	1.03218
BRD-K16149312-001-01-3	1.26923	0.754542	0.863808	0.973776
BRD-K16157799-001-01-8	1.05574	0.718905	1.03578	1.0127
BRD-K16158586-001-01-3	0.740359	0.452573	0.883224	0.686817
BRD-K16158766-001-01-5	0.951359	1.01006	0.965522	1.02612
BRD-K16159857-001-01-3	0.792269	0.93304	0.926356	0.927015
BRD-K16168130-001-01-3	0.663504	1.81902	0.8963	0.987816
BRD-K16168206-001-01-2	1.2026	1.79135	0.947898	1.04004
BRD-K16172814-001-01-8	0.86652	0.992827	0.913857	1.01245
BRD-K16176491-001-01-9	1.11968	0.823104	0.966574	1.03894
BRD-K16180420-001-01-7	0.602225	1.08727	0.816863	0.720199
BRD-K16181653-001-01-3	0.759251	0.932707	0.884678	0.996318
BRD-K16190564-001-01-2	0.642474	0.695898	0.872556	0.957407
BRD-K16195716-001-01-8	1.19344	0.856006	0.932208	1.06299
BRD-K16210823-001-01-5	0.736061	0.522109	0.968209	1.05314
BRD-K16248050-001-01-9	0.482325	0.461301	0.772737	0.810435
BRD-K16254782-001-01-2	0.73979	0.329006	0.96368	0.923797
BRD-K16255194-001-01-1	1.12736	0.99482	0.844368	0.981705
BRD-K16306096-001-01-1	0.320107	0.556351	1.00956	1.08126
BRD-K16315624-001-01-3	0.934214	1.0739	0.8445	0.948053
BRD-K16318272-001-01-2	0.807192	0.482616	0.944383	0.967584
BRD-K16323731-001-01-7	0.97927	0.816933	0.901549	0.936019
BRD-K16328398-001-01-0	0.821121	1.41487	0.833028	0.994795
BRD-K16329066-019-01-1	0.734403	0.680863	0.9525	1.1235
BRD-K16336022-001-01-7	0.545633	0.19246	0.988896	0.987728
BRD-K16344244-001-01-3	0.653133	1.29956	0.863685	0.911724
BRD-K16353814-001-01-4	1.40737	1.31048	0.830573	1.00928
BRD-K16360542-001-01-8	0.766862	0.561624	0.921217	1.05632
BRD-K16372954-001-01-4	0.815572	0.264268	0.935416	0.935778
BRD-K16383683-001-01-9	0.640888	1.09254	0.948113	1.09456
BRD-K16399753-001-01-0	0.626792	1.00553	1.05349	1.01153
BRD-K16401691-001-01-9	0.754092	0.647373	0.88753	0.724554
BRD-K16421840-001-01-7	0.988155	1.00611	1.03174	0.999529
BRD-K16425675-019-01-0	0.487473	0.718113	0.925914	1.06528
BRD-K16434151-001-01-3	0.740608	1.66456	1.0269	1.03479
BRD-K16434151-001-02-1	0.555595	0.34917	0.960295	0.940907
BRD-K16442680-001-01-6	0.933839	0.410739	0.923477	0.834356
BRD-K16459795-001-01-2	0.84095	0.959846	0.189351	0.977736
BRD-K16469999-001-02-3	0.83996	1.04076	0.984386	1.0101
BRD-K16478338-001-01-6	0.609147	0.686825	0.883289	0.921525
BRD-K16481000-001-01-7	0.909844	1.27528	0.941859	1.04734
BRD-K16483711-001-01-3	0.878947	0.700023	0.919239	0.9744
BRD-K16487365-001-01-3	1.15954	0.757576	1.033	1.07664
BRD-K16492430-001-01-4	0.947609	0.825118	0.86747	0.961535
BRD-K16507809-001-01-2	1.23018	0.972643	0.908488	0.921665
BRD-K16511469-001-01-5	1.28034	0.742225	0.851713	0.9169
BRD-K16512293-001-01-5	1.30278	1.0084	1.04275	0.706363
BRD-K16514811-001-01-4	0.662849	0.594302	0.993126	0.783063
BRD-K16514883-001-01-7	0.918385	0.91678	0.890104	0.961329
BRD-K16518464-001-01-5	1.13411	0.686292	0.911204	0.90581
BRD-K16529704-001-01-2	1.02236	1.63385	1.01296	1.10516
BRD-K16533613-001-01-4	1.07347	0.699105	0.861606	0.866286
BRD-K16533918-001-01-6	1.35436	1.00438	1.02217	0.929066
BRD-K16539011-001-01-9	0.73982	0.953025	0.96146	1.07698
BRD-K16552772-001-01-1	0.987381	0.714001	0.97922	1.00303
BRD-K16555857-001-01-2	0.805959	0.904441	0.933187	1.03884
BRD-K16561564-001-01-4	0.586158	1.18664	0.929089	1.04811
BRD-K16562233-001-01-3	0.485579	0.748211	0.898598	0.799981
BRD-K16580419-001-02-9	0.63274	0.685999	0.984325	1.07791
BRD-K16588281-001-01-9	0.688449	0.461154	0.989906	1.07695
BRD-K16621373-001-01-7	0.897511	0.681506	0.98424	0.995494
BRD-K16626032-001-01-9	1.27497	1.13743	0.857171	1.00858
BRD-K16633334-001-01-0	1.20178	0.920299	0.995181	1.08878
BRD-K16643204-001-01-6	0.382628	0.888817	1.03544	0.920603
BRD-K16659883-001-01-0	0.747585	1.14567	0.926276	0.76727
BRD-K16663346-001-01-3	0.574329	0.933927	0.96442	0.884489
BRD-K16666912-001-01-0	0.942731	0.879615	0.800059	0.974813
BRD-K16670438-001-01-7	0.965714	0.979199	0.957857	1.13311
BRD-K16673836-001-01-9	0.97435	0.814316	0.865114	0.765988
BRD-K16689057-001-01-7	0.755755	0.938752	1.03338	1.08212
BRD-K16698480-001-01-5	0.841436	0.952447	1.01753	0.994325
BRD-K16698502-001-01-9	0.840569	0.516135	0.921397	0.975463
BRD-K16699650-001-01-7	0.679966	0.420288	0.911022	0.932406
BRD-K16704189-001-01-5	0.753069	0.727856	1.01747	0.983123
BRD-K16705018-001-01-9	0.914366	0.7104	0.948878	1.05515
BRD-K16705045-001-01-6	0.839919	0.94594	0.901369	0.936253
BRD-K16705434-001-01-5	0.863763	0.814866	0.991928	1.05984
BRD-K16719331-001-01-0	0.733127	0.77348	0.990239	1.07031
BRD-K16741885-001-01-4	0.864279	0.99721	0.925201	1.06132
BRD-K16747480-001-01-0	0.734902	0.61875	0.985105	0.650639
BRD-K16752617-001-01-6	1.39033	0.854014	0.902383	0.88963
BRD-K16759914-001-02-9	0.689884	1.23235	0.970298	0.915472
BRD-K16761868-001-02-1	0.744915	0.572481	0.91189	0.971275
BRD-K16769896-001-01-2	0.792662	0.919428	0.96295	0.893734
BRD-K16769902-001-01-4	1.03378	1.27068	1.00665	1.10647
BRD-K16775575-001-01-7	1.01094	0.740232	0.999932	1.06834
BRD-K16778485-001-01-0	1.00296	0.943213	0.892031	0.990052
BRD-K16782280-001-01-9	1.15694	0.679864	0.981031	0.894157
BRD-K16782389-001-01-9	0.74832	1.13679	0.911622	0.957193
BRD-K16786967-001-01-0	1.11138	1.36958	1.02554	1.07939
BRD-K16792691-001-01-1	0.728969	0.96767	0.939175	1.02157
BRD-K16805845-001-01-6	0.592254	0.715109	0.827133	0.945255
BRD-K16826857-001-01-7	1.15257	0.875202	1.01632	1.05394
BRD-K16827660-001-01-2	0.514884	0.561216	0.99639	1.08957
BRD-K16830975-001-01-6	0.882686	0.983074	0.995705	1.10843
BRD-K16872487-001-01-9	0.438037	0.4603	0.948291	0.660197
BRD-K16884266-001-01-1	0.88888	0.750323	0.91873	0.88377
BRD-K16895470-001-01-9	0.72014	1.10008	1.00021	1.12307
BRD-K16897100-001-02-1	1.0415	1.18135	0.983239	1.05295
BRD-K16897811-001-01-3	0.889706	1.03757	0.968855	0.969939
BRD-K16900785-001-01-7	0.737233	1.01604	0.949372	1.04439
BRD-K16914190-001-01-7	0.95274	0.751041	1.00836	1.22151
BRD-K16930585-001-01-6	1.12618	0.939074	1.02033	0.634141
BRD-K16939073-001-01-6	0.755405	1.05862	0.86742	0.93678
BRD-K16942988-001-01-4	0.983074	1.2568	0.9879	0.98815
BRD-K16945477-001-01-5	0.918872	2.06648	0.95328	1.0324
BRD-K16955082-001-01-1	0.92972	0.815607	0.886029	0.857521
BRD-K16955260-001-01-5	1.00434	0.719395	0.913814	1.04511
BRD-K16955893-001-01-0	1.57092	0.824828	0.889724	0.986725
BRD-K16972254-001-01-8	0.759166	0.688358	0.917109	0.959872
BRD-K16974424-001-01-9	0.909968	0.525659	0.938857	0.95873
BRD-K16991208-001-01-5	0.65424	1.3935	0.941407	0.915686
BRD-K17007155-001-01-2	1.01984	0.884768	0.917577	0.980911
BRD-K17023197-001-01-9	0.851908	1.03237	0.926456	1.07184
BRD-K17025465-001-01-9	0.882269	0.581442	0.938031	0.819325
BRD-K17065706-001-01-4	0.818163	1.12063	1.02347	1.0717
BRD-K17070436-001-01-1	0.709923	0.807815	0.921541	0.890664
BRD-K17078647-001-01-9	0.99228	0.859637	1.00955	1.11608
BRD-K17083260-001-01-5	0.337942	1.04567	1.03522	1.01261
BRD-K17087588-001-01-1	0.581326	0.84289	0.979284	1.0267
BRD-K17088043-001-01-8	0.676525	1.03766	0.944746	0.945038
BRD-K17103381-001-01-5	0.762266	1.21353	1.01827	1.03734
BRD-K17106757-001-01-4	0.578266	0.79428	0.959617	0.675975
BRD-K17116894-001-01-7	1.00039	1.08454	1.00073	0.727623
BRD-K17121385-001-01-3	1.49471	1.36008	0.980105	0.962256
BRD-K17122788-001-01-4	1.04183	1.23752	0.938934	1.06464
BRD-K17139153-001-01-5	0.808426	0.743834	0.942959	0.91698
BRD-K17139610-001-01-2	0.508407	0.610681	0.973267	0.616769
BRD-K17181138-001-01-7	0.62435	0.912902	0.854592	0.977112
BRD-K17185909-001-01-5	0.69461	1.50625	0.928452	0.972225
BRD-K17191688-001-01-0	0.761482	1.49554	1.00313	1.08576
BRD-K17211944-001-01-6	1.07561	1.07688	0.86283	0.956438
BRD-K17223851-001-01-2	1.17479	0.717532	0.923605	1.01476
BRD-K17233067-001-01-1	1.20623	1.24668	0.950159	1.0096
BRD-K17233740-001-01-6	0.910144	0.673718	0.919231	1.01242
BRD-K17245631-001-01-2	1.00712	0.867113	1.01172	1.07402
BRD-K17257784-001-01-2	0.856474	1.41962	0.965117	1.04878
BRD-K17263650-001-01-1	1.09051	1.28213	1.00059	0.807156
BRD-K17265362-001-01-5	1.18181	0.924172	0.950253	0.966744
BRD-K17265362-001-03-1	1.40801	1.20618	0.95381	0.949113
BRD-K17266676-001-02-2	0.992228	0.79054	0.861186	0.980893
BRD-K17286277-001-01-5	1.36953	0.214377	0.929794	0.918834
BRD-K17289060-001-01-0	1.26663	1.24704	0.914075	0.999811
BRD-K17291009-001-01-0	1.29433	0.901395	0.926824	0.804875
BRD-K17298344-001-01-9	0.789149	0.59817	0.88125	0.882399
BRD-K17327306-001-01-2	0.683664	0.936286	0.948816	0.976606
BRD-K17343593-001-01-1	0.876061	0.953894	0.776093	1.03986
BRD-K17350012-001-01-9	1.20943	0.87141	1.0209	1.03896
BRD-K17353400-001-01-3	0.908781	1.18931	0.91259	0.925042
BRD-K17358986-001-01-4	1.0676	0.75472	0.995472	1.08771
BRD-K17360472-001-02-9	0.901815	0.626433	0.896383	1.00219
BRD-K17373537-001-02-5	0.42555	0.928143	0.922666	1.00378
BRD-K17407318-001-01-8	1.00253	0.931303	0.908382	0.984335
BRD-K17420784-001-01-6	0.562867	0.529978	0.947745	0.840115
BRD-K17446297-001-01-1	0.932108	0.78835	0.954298	0.972564
BRD-K17455084-001-01-9	1.44122	1.40561	1.04029	1.00096
BRD-K17466145-001-01-3	0.619643	0.695455	0.965767	0.973608
BRD-K17508599-001-01-3	0.856031	1.05645	1.08403	1.0749
BRD-K17514221-001-01-7	0.908984	0.680201	0.831931	0.95688
BRD-K17570530-001-01-5	0.907855	0.798177	0.947318	0.981155
BRD-K17579844-001-01-7	0.944575	0.897942	0.915325	1.0148
BRD-K17592392-001-01-6	0.68245	0.976364	1.01317	1.0895
BRD-K17611527-001-01-2	0.434035	0.354006	0.896397	0.955808
BRD-K17619118-001-01-0	1.20899	1.35218	0.918265	0.946009
BRD-K17625050-001-01-7	0.683245	0.85719	0.985273	1.07878
BRD-K17636644-001-01-7	0.578048	0.966391	0.981533	0.875592
BRD-K17660756-001-02-9	0.778416	0.792417	0.853975	0.742726
BRD-K17663482-001-01-6	0.885673	0.897198	0.988175	0.674002
BRD-K17663841-001-01-2	0.792879	0.984127	1.08763	1.07335
BRD-K17666351-001-02-5	0.755009	0.925457	0.936386	1.03559
BRD-K17668487-001-01-0	0.765275	1.14105	0.954754	0.78345
BRD-K17674406-001-01-6	1.28307	0.498838	0.926138	0.942091
BRD-K17686828-001-01-0	0.675814	0.838906	0.918424	1.06405
BRD-K17697961-001-02-2	1.14051	0.693122	0.983545	0.905697
BRD-K17706493-001-01-0	1.16411	0.474581	0.950706	1.02019
BRD-K17706562-001-01-6	0.577032	1.44362	0.939663	0.703629
BRD-K17713237-001-01-7	0.925859	1.24447	0.963879	0.915841
BRD-K17724585-001-01-2	0.741815	0.601084	0.946935	1.03545
BRD-K17731272-001-01-5	1.14911	0.722964	0.9125	0.95019
BRD-K17754691-001-01-0	1.09273	1.8563	0.899826	0.829773
BRD-K17771527-001-01-4	1.33029	1.35543	0.904606	0.991439
BRD-K17799075-001-01-1	0.790061	1.41656	0.947942	1.00956
BRD-K17800788-001-01-5	0.807846	0.74481	0.973145	0.972974
BRD-K17834240-001-01-6	0.61859	0.711454	0.912599	0.568525
BRD-K17839088-001-01-0	0.6136	0.562506	0.967077	0.859983
BRD-K17843525-001-01-3	0.411476	1.24632	0.945622	1.12002
BRD-K17849195-001-01-9	0.944371	0.791203	0.760106	0.980807
BRD-K17854785-001-01-5	0.959413	0.848937	0.929589	0.779383
BRD-K17874672-001-01-9	1.29049	1.18915	0.991055	0.97643
BRD-K17879172-001-01-3	0.66385	0.277717	0.967222	0.833082
BRD-K17884417-001-01-8	0.630039	0.710138	0.941963	1.01975
BRD-K17910820-001-01-2	0.67683	0.907419	0.977466	0.642542
BRD-K17914602-001-01-8	1.4568	0.991462	1.0578	1.04118
BRD-K17923226-001-01-5	1.30628	0.899303	0.935037	1.03374
BRD-K17932447-001-01-9	1.02644	1.01954	0.857852	0.941839
BRD-K17951468-001-01-3	0.865141	0.97122	0.878906	0.998036
BRD-K17957965-001-01-8	0.87683	1.01197	0.965735	1.02378
BRD-K17968366-001-01-0	0.673715	0.78718	0.877834	0.942032
BRD-K17973355-001-01-3	0.948146	1.21351	0.987656	1.02519
BRD-K17996849-001-01-8	0.466616	0.230566	0.930415	1.02123
BRD-K18001731-001-01-7	0.867071	0.707386	0.912295	0.859946
BRD-K18007945-001-01-6	0.704874	0.89259	0.872606	0.99038
BRD-K18009761-001-01-3	1.56565	0.626989	0.975944	0.955028
BRD-K18019832-001-01-7	0.743748	0.407983	0.969187	1.04719
BRD-K18021468-001-01-4	1.10965	1.30204	1.03211	0.786714
BRD-K18024030-001-01-7	0.698283	0.337749	0.859524	0.833172
BRD-K18026907-001-01-2	0.717658	0.800516	0.894919	0.935731
BRD-K18030740-001-01-5	1.21582	0.906878	0.980412	0.998618
BRD-K18032654-001-01-5	1.31952	1.2455	1.06176	0.644334
BRD-K18062880-001-01-8	0.779529	0.626223	0.936808	0.939095
BRD-K18076490-001-01-0	0.728153	0.466706	0.931727	0.893663
BRD-K18088968-001-01-8	1.24109	0.718338	0.830007	0.962965
BRD-K18097652-001-01-0	0.723522	0.911948	1.05812	0.639652
BRD-K18101396-001-01-1	0.859091	1.19117	0.940172	1.06867
BRD-K18128722-001-01-9	1.11434	0.753093	0.952775	0.771011
BRD-K18132838-001-01-2	0.730719	1.34255	0.935052	1.05523
BRD-K18138199-001-01-2	0.92918	1.17351	0.934548	1.01316
BRD-K18151846-001-01-2	0.595945	0.902224	0.96901	1.04887
BRD-K18152229-001-01-7	0.98779	0.986476	0.990957	0.98106
BRD-K18176520-001-01-2	0.733616	0.599557	0.909362	0.955108
BRD-K18182921-001-01-5	0.978423	1.68797	0.997776	1.01792
BRD-K18197439-001-01-8	0.486711	1.21223	0.911323	0.729561
BRD-K18227135-001-01-0	0.743736	1.09111	1.00319	1.06121
BRD-K18237196-001-01-5	0.799082	0.681184	0.879013	0.979461
BRD-K18238232-001-01-9	0.913285	0.953115	0.934946	1.04335
BRD-K18244645-001-01-8	0.372679	0.942224	0.799313	0.663477
BRD-K18248536-001-01-1	0.80055	1.0293	1.01382	1.05338
BRD-K18249751-001-01-7	0.406082	0.993971	0.992558	0.569998
BRD-K18255145-001-01-9	0.81233	0.602453	0.95895	0.762848
BRD-K18255961-001-01-0	1.16019	0.897699	0.909611	0.944565
BRD-K18269843-001-01-5	0.711357	1.73493	1.00069	0.915013
BRD-K18282652-001-01-8	1.01484	0.664739	0.914667	0.954095
BRD-K18284343-001-01-9	1.0119	1.00654	0.923133	0.967834
BRD-K18287297-001-01-8	1.19905	0.630872	1.00106	0.991049
BRD-K18296007-001-01-0	-0.0450317	0.765751	1.04042	0.62505
BRD-K18300217-001-01-6	0.537154	0.538218	0.920814	1.09755
BRD-K18309252-001-01-3	1.23339	0.981714	0.93997	0.95158
BRD-K18309912-001-01-5	1.25166	0.333205	0.893427	0.765667
BRD-K18334317-001-01-4	0.46659	0.739762	0.971824	1.01571
BRD-K18348935-001-01-6	1.11279	0.814251	0.913357	0.856856
BRD-K18368161-001-01-9	1.14412	1.32722	0.866877	0.943496
BRD-K18380584-001-01-3	0.773842	0.81498	0.890307	0.918298
BRD-K18390678-001-01-9	0.805408	1.30414	0.983881	1.09612
BRD-K18399375-001-01-6	1.47374	0.915257	1.00918	0.969896
BRD-K18401446-001-01-5	0.571398	0.681442	0.923505	0.889392
BRD-K18407079-001-01-6	0.884159	0.693236	0.95287	1.07541
BRD-K18415845-001-01-2	0.570029	1.06115	1.00218	1.16539
BRD-K18433151-019-01-5	0.374946	0.438574	0.998597	1.00863
BRD-K18447917-001-01-8	0.878785	1.14389	1.01949	1.10455
BRD-K18449990-001-03-0	0.624464	0.866258	0.95101	0.959543
BRD-K18452866-001-01-9	0.879805	1.42071	1.02498	1.04776
BRD-K18454119-001-01-0	1.05125	0.831424	0.949948	0.978596
BRD-K18462967-001-01-6	0.329211	0.861759	0.859421	0.890728
BRD-K18471876-001-01-7	1.13533	1.06589	1.05361	1.01358
BRD-K18483660-001-01-2	0.586998	0.767857	0.923267	0.776511
BRD-K18485697-001-01-4	0.950278	1.22149	0.859199	0.945203
BRD-K18512301-001-01-3	0.918527	0.362634	0.997776	0.657
BRD-K18533094-001-01-0	0.889131	1.0808	0.907509	0.968955
BRD-K18537363-001-01-5	0.390894	0.606672	0.920157	1.07835
BRD-K18542345-001-01-8	1.48982	0.77759	0.967651	0.985852
BRD-K18544970-001-01-6	0.682973	1.15953	1.00635	1.0031
BRD-K18554416-001-01-7	0.791624	1.28366	0.892681	1.00871
BRD-K18555956-001-02-8	0.564724	1.05126	1.00248	1.04205
BRD-K18560202-001-01-2	0.78295	1.40718	0.937411	1.03004
BRD-K18561719-001-01-6	0.586652	0.937248	0.890441	0.984443
BRD-K18571495-001-01-5	0.646758	0.78154	0.979972	1.04648
BRD-K18572633-001-01-6	1.07277	1.31542	1.02001	1.01014
BRD-K18600893-001-01-0	0.670205	1.04279	0.866072	0.954673
BRD-K18621041-001-01-7	0.929645	1.05099	1.01359	1.17443
BRD-K18634381-001-01-8	0.548992	1.34228	0.920129	1.05117
BRD-K18647673-001-01-7	0.798857	0.537964	0.98758	1.10683
BRD-K18674546-001-01-6	0.703055	0.67888	1.05798	0.997694
BRD-K18691989-001-01-4	0.779708	0.621309	0.975891	1.01851
BRD-K18692586-001-01-9	0.705228	0.493678	0.910204	1.01535
BRD-K18699770-001-02-8	0.643087	0.51182	0.980851	0.99345
BRD-K18715020-001-02-0	0.875926	0.688863	1.0124	1.01069
BRD-K18722825-001-01-5	1.16585	0.900607	0.918997	1.03561
BRD-K18732024-001-01-3	0.875976	0.973956	0.965693	1.04958
BRD-K18747403-001-01-2	0.711959	0.782892	0.969002	1.08549
BRD-K18750108-001-01-4	1.27535	0.684727	0.995794	1.05116
BRD-K18772134-001-01-6	0.656697	0.256432	0.874811	0.588627
BRD-K18782426-001-01-2	0.876474	0.82154	0.985918	0.913592
BRD-K18785094-001-01-6	1.05256	1.52937	0.901183	1.00671
BRD-K18787613-001-01-4	0.7938	0.656285	0.921019	0.939818
BRD-K18793059-001-02-1	1.02302	0.678676	0.94354	1.01236
BRD-K18813459-001-01-5	1.39961	1.06275	0.918967	0.91003
BRD-K18814836-001-01-7	1.16921	1.3931	0.9437	0.830076
BRD-K18823018-001-01-8	1.32983	0.761549	1.03923	0.947113
BRD-K18840975-001-01-3	0.433802	0.542701	1.04182	1.12314
BRD-K18844601-001-01-7	1.01241	0.90702	0.912775	0.924388
BRD-K18854210-001-01-9	0.799605	1.25893	1.01671	0.887333
BRD-K18870041-001-01-0	0.689568	1.44729	0.937633	1.00395
BRD-K18906514-001-01-0	0.757642	1.40629	1.01509	0.986879
BRD-K18909815-001-02-8	1.10422	1.17925	0.920227	0.975342
BRD-K18927819-001-01-8	1.15966	1.06014	0.900927	1.01012
BRD-K18928287-001-01-9	1.2303	1.6098	0.943055	0.900865
BRD-K18929270-001-01-6	1.01323	0.735264	0.922329	0.884374
BRD-K18935313-001-01-2	0.42648	0.588756	0.873304	0.969427
BRD-K18944320-001-01-5	0.625585	1.05141	1.02323	0.965888
BRD-K18964517-001-01-6	0.686275	1.24358	0.865049	0.997132
BRD-K18969163-001-01-2	1.07751	0.860185	1.0072	1.09135
BRD-K18972207-001-01-4	0.578332	0.533521	0.954576	1.09284
BRD-K18979455-001-01-8	0.899492	0.830853	0.979237	0.974304
BRD-K18981886-001-01-3	0.433773	0.470022	0.962609	0.737471
BRD-K18987330-001-01-2	0.7368	1.36481	0.967902	0.998564
BRD-K19004531-001-01-2	0.466561	0.702055	1.00541	0.666173
BRD-K19011062-001-01-4	0.900364	1.08958	0.977468	0.933782
BRD-K19014823-001-01-8	1.19734	0.513615	0.939248	0.899685
BRD-K19016577-001-02-9	0.849933	0.776912	0.959414	1.06724
BRD-K19031214-001-01-9	0.618989	1.10196	0.96523	1.01276
BRD-K19036853-001-01-4	1.03468	1.57335	1.00349	1.08683
BRD-K19049358-001-01-7	0.991857	0.775139	0.951808	0.963098
BRD-K19049757-001-01-4	0.443753	0.803432	0.960168	0.710253
BRD-K19061245-001-01-9	0.679256	0.869368	0.958434	0.998867
BRD-K19082899-001-01-4	0.426686	0.670578	0.981504	0.76003
BRD-K19106745-001-01-7	1.04687	0.816796	1.06153	0.973212
BRD-K19108240-001-01-3	1.08724	1.16537	0.917789	0.883282
BRD-K19108281-001-01-3	0.915547	1.39269	0.953716	1.07507
BRD-K19112799-001-01-0	1.09809	0.946967	0.817962	0.961947
BRD-K19114249-001-01-2	0.727585	1.14024	0.849991	0.986023
BRD-K19116577-001-01-9	0.88635	0.733923	0.93116	0.982072
BRD-K19117749-001-01-0	0.710535	1.2842	0.973849	0.952557
[truncated: 7,975 more rows]

## Sheet: 2nd round
PlateID	WellID	CompoundID	PbLuc_IC50	PbLuc_95% Confidence Intervals	PbLuc_max_inhibition (%)	Tox_IC50	Tox_95% Confidence Intervals	Tox_max_inhibition (%)		10	3.33333	1.11111	0.37037	0.123457	0.0411523	0.0137174	0.00457247	0.00152416	0.000508053		10	3.33333	1.11111	0.37037	0.123457	0.0411523	0.0137174	0.00457247	0.00152416	0.000508053
Broad_Pl_1_1527	A03	BRD-K49087010-001-01-1	1.225	0.9408 to 1.594	1.00122	9.124	4.904 to 16.98	0.596736		0.00214705	0.0297847	0.606073	0.908971	0.861952	0.900522	0.984731	0.826482	0.972722	1.0486		-0.00122106	0.0167285	0.633763	0.736138	0.898653	0.968315	0.900467	0.807395	0.931521	1.04012
Broad_Pl_1_1527	B03	BRD-K48766892-001-01-4	1.302	0.3608 to 4.702	0.970828	>10	0	0.0728762		0.0291717	0.399936	0.736923	0.809371	0.746726	0.8349	0.836422	0.85699	0.778218	0.579582		0.0379877	0.404727	0.586379	0.755658	0.818516	0.842986	0.865115	0.620067	0.939283	0.673011
Broad_Pl_1_1527	C03	BRD-K88085458-001-01-6	0.4415	0.2120 to 0.9196	0.974322	>10	0	0.0575811		0.0264771	0.162469	0.486178	0.574991	0.80467	0.890268	0.788922	0.962659	0.901368	0.746312		0.0256785	0.187399	0.564076	0.427656	0.801461	0.670556	0.750674	0.728545	0.847761	0.823809
Broad_Pl_1_1527	D03	BRD-K40819914-001-01-3	1.078	0.6225 to 1.868	0.971163	>10	0	0.0849148		0.0288365	0.119361	0.454805	0.858768	0.916618	0.900054	0.865784	0.701122	0.705105	0.682058		0.0414415	0.0979389	0.502793	0.989241	0.789092	0.716946	0.715788	0.866561	0.719784	0.796989
Broad_Pl_1_1527	E03	BRD-K36104357-001-01-0	1.422	1.051 to 1.924	0.98244	>10	0	0.176368		0.0175601	0.158879	0.682618	0.76602	0.803938	1.15319	1.05865	1.05926	1.04709	0.932838		0.0294552	0.151485	0.594723	0.992884	1.0743	0.877141	0.91951	0.742936	1.00873	0.993371
Broad_Pl_1_1527	F03	BRD-K31857539-001-01-9	0.01218	0.009876 to 0.01501	1.00565	>10	0	0.0586587		-0.000604803	-0.00564987	-0.0054867	0.00103573	0.0224067	0.1129	0.432927	1.0153	0.749209	0.823576		-0.00346724	-0.000719148	0.00881222	0.00286878	0.0412129	0.104772	0.379636	0.885758	1.08641	1.08569
Broad_Pl_1_1527	G03	BRD-K09790760-001-01-0	>10	0	0.283831	>10	0	0.0508599		0.927193	0.989697	0.850688	0.957936	0.782187	1.05191	0.88226	0.98238	0.800899	0.716169		0.917656	1.08765	0.804368	1.03451	0.815172	0.896795	0.853894	0.831139	0.762163	0.934771
Broad_Pl_1_1527	H03	BRD-K94107458-001-01-0	3.08	1.930 to 4.914	0.948937	>10	0	0.0503455		0.051063	0.451462	0.75152	0.842036	0.949332	0.788388	0.785032	0.91399	0.865096	0.703438		0.0634263	0.592362	0.890146	0.968086	0.848532	0.919018	0.897595	0.817786	0.701148	0.881389
Broad_Pl_1_1527	I03	BRD-K07064121-001-01-6	4.626	3.601 to 5.943	0.917079	>10	0	0.178718		0.0978004	0.676259	0.94946	0.904821	1.03965	0.891375	0.779519	0.915943	1.02131	0.923864		0.0829213	0.776738	0.976967	0.927968	1.09046	0.987626	1.14103	0.890568	1.07087	0.80239
Broad_Pl_1_1527	J03	BRD-K07378992-001-01-6	0.2243	0.1612 to 0.3120	1.01098	>10	0	0.069039		-0.00687586	-0.0109816	0.0596449	0.39295	0.643289	0.851293	0.812004	0.737298	0.895305	0.827836		-0.0012956	0.00661573	0.0102037	0.353417	0.769846	0.937817	0.965482	0.949928	0.916414	0.908334
Broad_Pl_1_1527	K03	BRD-K17570530-001-01-5	>10	0	0.24893	>10	0	0.045208		0.831284	0.762938	0.913073	0.8577	1.15964	1.05159	0.964048	0.944904	0.75107	0.91208		0.764434	0.866988	0.939522	0.949058	0.992715	0.931263	0.950802	0.968494	0.864941	0.945942
Broad_Pl_1_1527	L03	BRD-K61371184-001-01-2	0.05529	0.04063 to 0.07524	1.00851	>10	0	0.223404		-0.00828265	-0.00154855	-0.00850756	-0.00533235	0.119233	0.640507	0.994689	0.858975	0.782311	0.741787		0.000627568	0.00301289	-0.000192388	-0.00113161	0.123189	0.717687	0.866551	0.979585	0.74559	0.77645
Broad_Pl_1_1527	M03	BRD-K69682028-019-01-6	8.968	6.972 to 11.54	0.624489	>10	0	0.1594		0.433191	1.02767	0.903101	0.890145	0.985203	0.839769	1.00253	0.901629	1.16479	0.740632		0.375511	0.919654	0.981181	0.979993	0.947513	0.862893	0.916792	1.20726	0.921478	0.903881
Broad_Pl_1_1527	N03	BRD-K03006541-001-01-3	8.985	6.834 to 11.81	0.600717	>10	0	0.051961		0.399283	0.853533	1.00811	1.04897	0.860382	0.719614	0.801865	0.958703	0.91563	0.848549		0.444716	1.03838	1.05665	1.06732	1.01953	0.936207	0.933464	0.704403	0.982925	0.926447
Broad_Pl_1_1527	O03	BRD-K77041516-001-01-2	>10	0	0.205282	>10	0	0.0437926		0.85722	0.900464	1.14972	0.876606	1.00602	0.951131	0.812453	0.94677	0.833176	1.18665		0.961691	1.13548	1.08223	1.20123	0.794718	0.956756	0.927213	0.820584	0.869363	0.922502
Broad_Pl_1_1527	P03	BRD-K14002526-001-01-8	6.77	3.680 to 12.45	0.927407	>10	0	0.372668		0.0725928	0.93137	1.02341	0.931718	1.16132	1.07065	0.876156	1.0511	0.998221	1.08384		0.11973	1.03467	1.07879	1.01589	1.07912	1.05134	0.925921	0.90327	0.737534	1.16231
Broad_Pl_1_1527	A13	BRD-K48690594-001-01-7	>10	0	0.163559	>10	0	0.137698		0.913602	0.892218	1.0718	1.03617	0.854022	0.954968	1.10775	1.04552	1.01237	0.906753		0.950191	0.932758	0.93658	0.910217	0.854639	1.01265	0.836441	0.89678	1.04308	0.927546
Broad_Pl_1_1527	B13	BRD-K41549807-001-01-5	6.941	2.729 to 17.65	0.657197	>10	0	0.101926		0.35946	0.700853	0.925227	0.887036	0.856439	0.910687	0.919939	0.904283	0.825115	0.905739		0.342803	0.51072	0.768151	0.841326	0.894539	0.866764	0.830766	0.738533	0.877598	0.990816
Broad_Pl_1_1527	C13	BRD-K43975729-001-01-5	0.6784	0.3734 to 1.233	0.971472	>10	0	0.0703594		0.0285278	0.0754504	0.419494	0.712372	0.77417	0.903079	0.754656	0.865872	0.950262	0.875508		0.0445971	0.118299	0.355191	0.87229	0.714218	0.99353	0.756304	0.76589	0.70973	0.810729
Broad_Pl_1_1527	D13	BRD-K43504903-001-01-1	>10	0	0.595765	>10	0	0.214051		0.404235	0.856271	0.703918	0.923939	0.770108	0.698939	0.721678	0.881475	0.851367	0.875631		0.515684	1.01152	0.877886	0.729196	0.849322	0.783522	0.707956	0.688581	0.793441	0.794241
Broad_Pl_1_1527	E13	BRD-K31618614-001-02-1	0.8462	0.5653 to 1.267	1.00309	>10	0	0.27435		-0.00308324	0.0220186	0.500409	0.772441	0.882652	0.907097	0.859848	0.980519	0.819686	0.824078		-0.00309454	0.0453972	0.510372	0.716742	0.847195	0.873299	0.744685	1.04494	0.802122	1.03544
Broad_Pl_1_1527	F13	BRD-K31169989-001-01-4	>10	0	0.460752	>10	0	0.131266		0.539248	0.965935	0.747075	0.902943	0.725113	1.05181	0.740729	0.860073	0.770519	0.959338		0.606997	0.764344	0.864225	0.979834	0.956766	0.864891	1.13574	0.866054	0.904254	1.07467
Broad_Pl_1_1527	G13	BRD-K92009254-001-01-6	0.4962	0.3562 to 0.6913	1.01022	8.97	7.580 to 10.61	0.528456		-0.0102187	0.000444782	0.0318618	0.719618	0.928658	0.893849	0.704787	0.936754	0.94643	0.978579		-0.00643896	0.00392727	0.0510325	0.769682	0.875416	0.918143	0.922218	1.05401	0.739696	0.741853
Broad_Pl_1_1527	H13	BRD-K90570429-001-01-9	>10	0	0.25625	>10	0	0.079795		0.799012	0.875173	0.902444	0.865391	0.990186	1.01032	0.74375	0.870855	1.00966	0.91548		0.75782	0.903151	0.989713	0.878572	0.9041	0.89104	0.867043	0.997943	0.764732	1.00186
Broad_Pl_1_1527	I13	BRD-K06373569-001-01-1	1.718	1.336 to 2.210	0.93307	>10	0	0.138934		0.0669303	0.169053	0.762532	0.902299	0.825988	0.863711	0.896716	1.06754	0.926289	1.11858		0.0844569	0.17333	0.74307	0.807156	1.05057	1.13822	0.991979	1.06887	0.965418	0.996228
Broad_Pl_1_1527	J13	BRD-K05470326-001-01-0	0.2977	0.2227 to 0.3979	0.920677	>10	0	0.0953164		0.0896992	0.232386	0.386026	0.513194	0.638535	0.781729	0.9335	0.903816	0.884253	0.936459		0.0793235	0.175104	0.293257	0.50906	0.523561	0.699021	0.784237	0.930796	1.06208	0.946827
Broad_Pl_1_1527	K13	BRD-K16956545-001-01-0	1.29	0.8559 to 1.943	0.948302	>10	0	0.048831		0.0807248	0.182014	0.569082	0.935687	0.838217	0.861105	0.842389	0.990305	0.795241	1.11568		0.0516984	0.19441	0.634424	0.736054	0.804055	1.15668	1.05206	0.874512	1.16996	1.12263
Broad_Pl_1_1527	L13	BRD-K77718491-001-01-4	>10	0	0.203304	>10	0	0.0685091		0.982473	0.796696	0.996828	0.861537	0.987302	0.808224	1.00579	0.828427	1.13099	0.843588		0.827491	1.05999	0.876867	0.922815	0.864474	0.949699	0.920951	0.907086	0.832172	0.941902
Broad_Pl_1_1527	M13	BRD-K31467596-001-01-7	>10	0	0.33645	>10	0	0.191429		0.7997	0.94127	1.0319	0.807461	0.892385	0.87243	0.835139	1.0859	0.900914	0.963589		0.66355	0.988496	1.04598	0.903454	0.898773	1.04775	0.884987	1.05432	1.02917	1.19575
Broad_Pl_1_1527	N13	BRD-K50964970-001-01-5	1.682	1.229 to 2.301	0.917809	>10	0	0.0770882		0.0835208	0.363623	0.710269	0.900808	0.89818	1.11705	0.957318	1.1274	0.995112	0.862556		0.0821908	0.327631	0.566775	0.717985	0.871585	0.924007	0.908965	0.992948	0.872459	0.973488
Broad_Pl_1_1527	O13	BRD-K80906650-001-01-7	0.04355	0.03619 to 0.05242	1.01077	>10	0	0.451851		-0.0107655	-0.0102054	-0.00998051	-0.00545583	0.0258686	0.66941	1.01591	0.894806	1.02811	0.953543		0.000344311	-0.00227955	-0.00699057	-0.0011167	0.0140351	0.458566	0.757894	0.871913	0.919992	1.08643
Broad_Pl_1_1527	P13	BRD-K71196168-001-01-1	4.858	3.590 to 6.574	0.931522	>10	0	0.444863		0.0684782	0.900663	0.994204	0.939502	1.01978	1.01262	0.989564	0.933831	1.09808	1.15922		0.0744634	0.679735	0.889937	1.01429	0.951299	0.86258	1.03897	0.903275	1.32654	1.10147
Broad_Pl_1528	A03	BRD-K31411295-001-01-9	2.689	2.112 to 3.422	1.00646	>10	0	0.173304		-0.00645524	0.458886	0.907495	1.05158	0.94594	0.913959	1.07721	0.886313	0.767532	1.06806		0.000971387	0.302976	0.865734	0.920539	0.943163	0.969452	1.03937	0.8762	0.792791	1.01309
Broad_Pl_1528	B03	BRD-K47463456-001-01-7	0.07192	0.05327 to 0.09711	1.00489	>10	0	0.131811		-0.00392017	-0.00489487	-0.0018639	0.0179208	0.268653	0.792361	0.791793	0.805131	0.746969	0.911548		0.00100654	0.00195569	0.000373776	0.00528021	0.301981	0.783585	0.834337	0.931517	0.896147	0.931758
Broad_Pl_1528	C03	BRD-K42750356-001-01-3	0.1839	0.1422 to 0.2378	0.998521	>10	0	0.0987791		0.00300532	0.00759239	0.0756716	0.164091	0.721089	0.909936	0.735743	0.924916	0.764719	0.960249		0.0014786	0.00473282	0.0809759	0.156039	0.715664	0.972441	0.872283	0.975484	1.00028	0.937859
Broad_Pl_1528	D03	BRD-K41442469-001-01-2	2.83	1.441 to 5.558	0.904948	>10	0	0.0849285		0.128502	0.708738	0.811616	0.903998	0.906777	0.875788	0.688381	0.791652	0.719186	0.629732		0.0950524	0.389444	0.543974	1.02385	0.889433	1.02814	0.954221	0.78348	0.868803	0.86703
Broad_Pl_1528	E03	BRD-K31004267-001-01-6	>10	0	0.270616	>10	0	0.13678		1.03916	0.767318	0.96608	1.12869	0.840126	0.812779	0.942435	0.990721	0.992157	0.945517		0.956355	0.928448	0.889493	0.8899	1.06631	1.15221	0.930362	0.827884	1.08322	0.729384
Broad_Pl_1528	F03	BRD-K01882341-001-02-9	>10	0	0.20743	>10	0	0.0452742		1.091	0.964075	0.88282	0.934543	0.941794	0.872599	0.962916	0.97967	0.90467	0.801411		0.86931	0.937905	0.980576	0.79257	1.12129	0.816786	0.985402	1.03358	0.875532	0.956174
Broad_Pl_1528	G03	BRD-K88402291-001-01-4	0.7519	0.5284 to 1.070	1.00408	>10	0	0.0311783		-0.00244957	0.00558314	0.245111	0.621182	0.765519	0.81551	0.907889	1.02097	0.930037	0.806242		-0.00407566	0.0115426	0.494462	0.914633	1.11033	0.890553	0.980265	0.976438	0.893295	1.09216
Broad_Pl_1528	H03	BRD-K88384060-001-01-3	>10	0	0.275211	>10	0	0.0277049		0.864168	0.820401	0.886317	0.757708	0.882551	0.92772	0.828164	0.878626	0.925591	0.762043		0.724789	0.805536	0.766089	1.11044	1.0267	0.961844	0.879007	0.824509	0.830922	0.844331
Broad_Pl_1528	I03	BRD-K05060234-001-01-0	>10	0	0.155212	>10	0	0.111337		0.945491	1.23447	1.25148	1.00947	1.09872	1.04009	1.02848	1.10839	0.939361	0.987583		0.867939	0.844788	1.0925	0.938547	1.02421	1.11187	1.08251	1.09031	1.00638	0.949952
Broad_Pl_1528	J03	BRD-K03339938-001-01-9	>10	0	0.210941	>10	0	0.0446468		1.4773	1.01068	0.951442	0.938669	0.813591	0.980354	0.921586	0.997531	0.921103	1.10346		1.18715	1.0698	0.997184	1.00795	0.949902	0.90243	0.863685	0.858206	0.789059	1.01984
Broad_Pl_1528	K03	BRD-K52785744-001-01-7	0.0888	0.07293 to 0.1081	1.00734	7.928	5.445 to 11.54	0.496547		-0.00733589	4.27499e-06	-0.00365084	-0.00590376	0.436109	0.905012	1.01351	1.04598	0.845884	0.809662		-0.00443222	0.00114715	-0.0027348	-0.0066469	0.187089	0.826603	0.981631	0.946683	0.972672	0.915843
Broad_Pl_1528	L03	BRD-K44445002-001-01-6	>10	0	0.306652	>10	0	0.0206728		0.730823	0.858017	1.03422	0.883401	1.09526	1.01169	0.854118	0.693348	0.981474	0.829652		0.76739	0.736128	0.874829	0.975308	0.813727	1.03816	1.03741	0.876878	1.17397	0.952222
Broad_Pl_1528	M03	BRD-K15519105-001-01-9	0.2086	0.1664 to 0.2615	1.00568	>10	0	0.376797		-0.00283004	-0.00106875	0.000341999	0.139318	0.794952	0.913963	1.12372	0.765553	1.09655	1.05497		-0.00568268	-0.000741095	0.0127227	0.137764	0.889895	1.02746	1.08056	0.984177	1.18177	1.01975
Broad_Pl_1528	N03	BRD-K75724375-001-01-5	>10	0	0.518082	>10	0	0.03767		0.501794	0.868619	1.02517	0.778921	0.93368	0.840814	0.828553	0.81896	1.07265	0.910466		0.481918	0.672028	0.841559	1.01014	1.08496	0.76977	0.985156	0.957771	0.903655	0.92776
Broad_Pl_1528	O03	BRD-K89605819-001-01-4	7.254	4.016 to 13.10	0.580581	>10	0	0.0474565		0.419419	0.612196	0.928032	0.898616	1.02801	0.807965	0.729613	0.946013	1.02924	0.909338		0.430151	0.717657	0.724357	1.09661	0.880434	1.02461	0.838772	1.04317	1.05708	1.06822
Broad_Pl_1528	P03	BRD-K45723650-001-01-0	8.733	4.293 to 17.76	0.530768	>10	0	-0.0101316		0.53525	0.692904	0.682515	0.895119	0.906303	1.00145	1.00327	0.946637	0.808439	0.850621		0.469232	0.632937	0.828175	0.929081	1.20906	1.17975	1.02659	0.929156	0.988591	1.08587
Broad_Pl_1528	A13	BRD-K93348054-001-01-9	>10	0	0.37903	>10	0	0.178669		0.675833	0.646806	0.804784	0.8299	0.996637	0.923193	1.04155	0.863484	0.990554	1.07667		0.62097	0.646602	0.7	0.873559	1.05315	0.99987	0.936288	1.07915	0.876742	1.15667
Broad_Pl_1528	B13	BRD-K87663528-001-01-7	4.631	3.199 to 6.706	0.962323	>10	0	0.578352		0.0629706	0.763672	0.923732	0.732883	0.919709	0.968696	0.825193	1.00256	0.898249	0.929678		0.0376767	0.767264	0.787196	0.8385	0.877204	0.933079	0.912403	0.933405	0.754775	0.746277
Broad_Pl_1528	C13	BRD-K38901607-001-01-5	0.7551	0.4861 to 1.173	0.978433	>10	0	0.108284		0.0215673	0.169503	0.535904	0.632229	0.91372	0.737885	0.860697	0.837176	0.872975	0.993512		0.0368531	0.178949	0.5215	0.644443	0.80055	0.80413	1.01048	1.04065	0.892642	1.16609
Broad_Pl_1528	D13	BRD-K34781184-001-01-6	1.209	0.6016 to 2.428	0.999012	>10	0	0.491222		0.000987523	0.353302	0.58549	0.790301	0.930602	0.778395	0.960604	0.688039	0.809936	0.799753		0.0050944	0.292204	0.649058	0.710888	0.827683	0.677065	1.1062	0.796899	0.788582	0.912032
Broad_Pl_1528	E13	BRD-K30973842-001-02-5	0.1481	0.05847 to 0.3750	1.00345	>10	0	0.140398		0.912754	0.00306944	-0.00345419	0.0176899	0.578415	0.776826	0.919427	1.00567	1.06927	0.828263		1.15193	-0.00152452	-0.000188681	0.0126323	0.794624	0.730177	1.00264	0.821165	1.07264	1.14765
Broad_Pl_1528	F13	BRD-K30240821-001-02-4	>10	0	0.293352	>10	0	0.0848274		0.777245	0.904084	0.983641	0.973933	1.09763	0.831067	0.80316	0.706648	0.848039	0.892336		0.928614	1.08171	1.06992	1.02056	0.864283	1.05638	0.874051	0.993809	0.892998	0.99302
Broad_Pl_1528	G13	BRD-K87640608-001-01-8	>10	0	0.323602	>10	0	0.0376482		0.676398	0.905832	1.05645	0.907688	0.819499	0.925732	0.793088	0.71492	0.850198	0.842763		0.761102	0.784319	1.03479	1.17352	0.934465	0.869847	0.998876	1.04516	0.924175	1.02381
Broad_Pl_1528	H13	BRD-K87351697-001-01-4	1.359	0.9879 to 1.868	0.979006	>10	0	0.051637		0.0209945	0.135167	0.589735	0.905986	0.870461	0.803267	0.986963	0.955499	0.801852	1.04134		0.0301037	0.135127	0.671983	0.862797	0.791932	0.96654	0.906447	0.787051	0.99059	0.888017
Broad_Pl_1528	I13	BRD-K02689416-001-01-9	4.238	3.189 to 5.632	0.818706	>10	0	0.119768		0.181294	0.531052	0.917161	1.10473	0.986155	0.980059	0.795482	1.0623	1.14389	1.17135		0.194813	0.641952	1.00471	0.942429	1.02545	1.13209	0.951775	0.802137	1.02864	1.00416
Broad_Pl_1528	J13	BRD-K74261250-001-01-9	>10	0	0.251664	>10	0	0.0643928		0.846701	1.13018	0.915626	1.00534	0.954691	0.823633	1.0389	0.770029	0.91826	1.17243		0.748336	1.09955	0.94257	0.845074	1.12403	0.925521	0.787919	1.15391	0.834016	1.00973
Broad_Pl_1528	K13	BRD-K88581921-001-01-3	2.362	1.614 to 3.457	0.996829	>10	0	0.0293556		0.0464692	0.398729	0.796628	0.805755	1.09843	1.02652	0.789514	1.0147	0.847855	1.02042		0.003171	0.337778	0.87383	0.764085	0.843683	1.18133	1.25424	0.995702	1.06312	0.883025
Broad_Pl_1528	L13	BRD-K02242562-001-01-9	1.376	0.9797 to 1.932	1.00657	>10	0	0.0351108		-0.00657494	0.00560451	0.646148	1.00831	0.778523	0.936779	1.09809	0.968316	0.84735	1.08816		-0.003925	0.0130943	0.791751	0.843688	0.964782	1.06832	0.9644	1.01159	0.847886	1.11166
Broad_Pl_1528	M13	BRD-K19818397-001-01-8	>10	0	0.199367	>10	0	0.159561		1.07072	1.10334	0.969427	0.89491	1.06841	1.03214	1.10626	1.0648	0.800633	1.03379		1.02976	1.00839	1.17186	1.0101	1.12583	0.990314	0.938301	1.09838	1.02	1.06448
Broad_Pl_1528	N13	BRD-K76178468-001-01-1	7.866	5.953 to 10.39	0.765508	>10	0	0.219523		0.360583	0.944961	0.890062	0.83482	0.987374	1.00327	1.24486	1.05054	0.977665	0.809701		0.234492	0.965048	1.14939	0.998228	0.891281	0.968604	1.12323	1.04444	0.989806	1.01143
Broad_Pl_1528	O13	BRD-K36757984-001-01-6	>10	0	0.32402	>10	0	0.0249212		0.777942	0.899326	0.933184	0.909787	0.837193	0.854554	0.924523	0.886355	0.859795	0.914579		0.67598	1.10781	1.04969	1.04359	0.842046	0.875186	1.02895	0.985483	1.03854	0.968769
Broad_Pl_1528	P13	BRD-K95406835-001-01-9	5.634	2.241 to 14.17	0.601135	>10	0	0.0467764		0.400716	0.616441	0.398865	0.900501	0.893546	1.19286	0.969384	0.882931	1.09035	1.2925		0.513571	0.577746	0.807801	0.96207	1.17677	1.20585	0.871645	1.13806	1.02494	1.1801
Broad_Pl_3_1529	A03	BRD-K26542939-001-01-0	4.132	2.991 to 5.708	0.893263	>10	0	0.155699		0.106737	0.681064	0.923588	0.640673	1.12364	1.19432	1.03326	1.1436	1.02511	0.864448		0.148019	0.545514	1.02011	0.86296	0.993143	0.945003	1.11284	0.978556	1.01921	1.02064
Broad_Pl_3_1529	B03	BRD-K46850496-001-01-8	1.691	0.9560 to 2.990	0.878094	>10	0	0.108237		0.121906	0.484503	0.526798	0.584664	0.823837	0.943305	0.971568	0.815432	0.822377	0.757445		0.151297	0.43163	0.652505	0.892856	0.879292	0.826859	0.941333	1.08622	0.894845	0.95316
Broad_Pl_3_1529	C03	BRD-K38534329-001-01-1	0.1752	0.1193 to 0.2573	1.0059	5.491	4.009 to 7.521	0.566957		-0.0035388	-0.00590264	-0.00109192	0.313612	0.640151	0.712141	0.736292	0.788409	0.99296	0.912452		-0.00543551	-0.00199302	0.0310372	0.418189	0.639266	0.979331	0.866222	0.893951	0.898797	0.97165
Broad_Pl_3_1529	D03	BRD-K97485207-001-01-1	>10	0	0.470696	>10	0	0.0647201		0.529304	0.732419	0.725122	0.847334	1.04192	0.83929	0.637367	0.888868	0.940306	0.798695		0.664965	0.974881	0.953396	0.946629	0.770662	0.774867	0.893345	0.797406	0.901001	0.850316
Broad_Pl_3_1529	E03	BRD-K29474997-001-01-2	>10	0	0.133926	>10	0	0.115559		1.32775	0.987104	1.2533	0.924565	0.88688	0.866074	0.898665	1.19253	1.10687	1.30578		1.28288	1.15521	1.04154	0.907991	0.916233	1.09379	1.04172	1.05637	1.05854	1.12231
Broad_Pl_3_1529	F03	BRD-K25161260-019-01-1	>10	0	0.400831	>10	0	0.0549912		0.871715	0.897884	0.599169	0.782958	0.952154	0.908535	0.966108	0.915822	0.786719	0.658427		0.873494	0.97457	0.827992	0.976689	1.10804	0.998064	1.12279	1.10793	0.936003	0.935101
Broad_Pl_3_1529	G03	BRD-K16971439-019-01-0	8.444	(Very wide)	0.94244	>10	0	0.050445		0.0575598	1.05755	0.953141	0.985966	0.931998	0.958333	1.04706	1.01421	0.756873	0.914533		0.0811702	1.01097	0.811496	0.941619	1.05199	0.969715	1.05842	0.895022	1.00453	1.09415
Broad_Pl_3_1529	H03	BRD-K14350179-001-01-1	>10	0	0.265955	>10	0	0.0534539		0.984462	0.757518	0.766182	0.842055	0.969971	0.79995	0.814089	0.938308	0.734045	0.815251		1.04612	0.894773	0.861077	1.01087	1.10119	1.06951	0.874316	1.06221	1.04015	0.938527
Broad_Pl_3_1529	I03	BRD-K20449903-001-01-6	>10	0	0.483761	>10	0	0.0924205		0.516239	1.18132	1.05189	1.01412	1.00581	0.932819	1.09299	0.838074	1.07406	1.07004		0.70453	1.03693	1.04192	0.912908	1.22744	1.19289	1.06396	0.956434	1.05333	0.940895
Broad_Pl_3_1529	J03	BRD-K12341671-001-01-5	>10	0	0.502133	>10	0	0.0495826		0.504962	0.695818	0.87802	0.925966	1.0373	0.988457	0.885464	1.05727	1.03337	0.774431		0.497867	0.797966	0.847804	0.915002	0.976579	0.976916	0.835581	0.854415	1.15372	0.880898
Broad_Pl_3_1529	K03	BRD-K72173400-001-01-7	7.934	4.313 to 14.60	0.780106	>10	0	0.062018		0.219894	1.07873	0.90478	0.895031	0.998342	1.03268	1.17768	0.827525	0.737957	1.03706		0.265017	0.893736	1.08815	1.03402	1.23429	0.958031	1.02991	0.884382	0.822645	0.947299
Broad_Pl_3_1529	L03	BRD-K27481961-001-01-1	>10	0	0.228426	>10	0	0.0581063		1.03755	0.935515	1.00248	0.979085	0.950675	0.90688	0.771574	1.01414	0.984267	0.883222		0.890429	1.20211	0.97832	1.11875	1.12226	0.964942	0.890867	0.887058	1.03777	1.05295
Broad_Pl_3_1529	M03	BRD-K63968422-001-01-5	>10	0	0.21644	>10	0	0.0941268		0.944291	1.01427	0.988057	0.962328	0.970909	1.0121	1.14065	0.904111	1.11813	1.00475		0.853994	1.10289	1.02335	1.23854	1.05184	1.10028	1.04849	1.15681	1.01106	0.78356
Broad_Pl_3_1529	N03	BRD-K03403405-001-03-3	1.592	1.183 to 2.143	0.999715	>10	0	0.0615516		0.000285364	0.05545	0.773215	0.741855	1.02041	0.894621	1.04074	0.870543	1.01004	0.881234		0.00178655	0.051296	0.805074	0.768644	1.10688	0.909752	0.832526	1.02571	0.860988	0.952242
Broad_Pl_3_1529	O03	BRD-K12503654-001-01-1	>10	0	0.492867	>10	0	0.0533241		0.562266	0.831745	1.12858	0.915192	0.974484	1.03615	1.02364	1.07038	1.03514	0.997732		0.507133	0.910245	0.900044	1.1079	1.03179	1.20678	0.966193	1.00653	0.849077	1.0674
Broad_Pl_3_1529	P03	BRD-K38571893-001-01-9	>10	0	0.217398	>10	0	-0.0216412		0.885424	0.87068	0.966455	0.946914	1.18472	1.07353	0.782602	0.904775	0.975456	0.971685		0.797254	0.96913	1.03981	0.977157	1.25067	1.0244	1.17754	0.977738	0.829315	1.11113
Broad_Pl_3_1529	A13	BRD-K46014293-001-01-6	>10	0	0.247171	>10	0	0.145888		1.07794	0.865786	1.01477	1.09928	1.05066	0.974308	0.772907	0.953458	0.847925	0.752829		0.933866	0.910034	0.826669	1.03343	1.09505	0.937018	0.977081	0.950316	0.977978	1.06703
Broad_Pl_3_1529	B13	BRD-K35841161-001-02-2	0.9145	0.4490 to 1.863	0.977643	>10	0	0.366681		0.031914	0.215987	0.61219	0.756751	0.678959	0.840892	0.792316	0.866558	0.867578	0.941937		0.0223572	0.232025	0.612072	0.731522	0.909074	0.857622	0.709612	0.834801	0.885924	0.692543
Broad_Pl_3_1529	C13	BRD-K36853881-001-02-5	>10	0	0.310541	>10	0	0.0863729		0.818236	0.689459	0.92245	0.861967	0.877947	0.914704	0.754837	0.849762	0.862387	0.844145		0.7677	0.839655	0.843704	0.835779	0.814664	0.917758	0.713042	0.815629	0.814386	1.01029
Broad_Pl_3_1529	D13	Empty	>10	0	0.32081	>10	0	0.0946052		0.703872	0.686593	0.90771	0.74016	0.917566	0.813571	0.816341	0.825063	0.815139	0.770431		0.913313	0.767675	0.941746	0.990215	1.02121	0.867532	0.67919	0.960981	0.851419	0.886628
Broad_Pl_3_1529	E13	BRD-K99467823-001-01-1	4.058	0.4546 to 36.21	1.00393	>10	0	0.305131		-0.00182452	0.85868	0.890216	1.01574	0.868643	0.913307	0.810846	0.887295	0.941478	0.78626		-0.00393126	0.740126	0.962881	1.01656	1.01332	0.939205	0.910822	1.01951	0.848643	1.08936
Broad_Pl_3_1529	F13	Empty	>10	0	0.246497	>10	0	0.0787359		0.753503	0.898206	0.970328	0.86415	0.882694	0.842821	0.770504	1.00114	0.921659	0.91781		1.01007	0.946347	0.97588	0.94073	0.91035	1.1211	0.992722	0.965729	1.12293	0.968953
Broad_Pl_3_1529	G13	BRD-K13582094-001-01-2	>10	0	0.21689	>10	0	0.0400534		0.863705	0.912868	0.84455	0.855979	1.09331	0.963793	0.78311	0.853879	0.867964	0.861517		1.09392	0.969117	1.00915	0.812916	0.997706	1.04617	0.910886	0.879966	0.943987	0.973921
Broad_Pl_3_1529	H13	Empty	>10	0	0.273875	>10	0	0.0736713		0.847764	0.758338	0.807667	0.947212	0.880164	1.02026	0.871998	1.00799	0.987256	1.04487		0.843999	1.05325	0.818174	1.03471	1.03804	0.973773	1.02416	0.979255	0.973327	0.726125
Broad_Pl_3_1529	I13	BRD-K72687327-001-01-6	>10	0	0.270677	>10	0	0.105292		0.729323	1.00749	0.970411	0.917678	0.843095	0.892496	1.10857	0.909678	1.10079	1.08576		0.7479	1.10887	1.02428	1.14811	0.883287	1.14924	1.05239	0.941927	1.07972	0.958267
Broad_Pl_3_1529	J13	Empty	>10	0	0.199347	>10	0	0.0715315		0.852731	0.949732	0.953014	1.02757	0.891808	0.800653	0.897967	1.05545	0.884023	1.00067		0.981771	0.936706	1.0077	1.11173	0.862518	1.23686	0.995001	0.805445	0.955752	0.894832
Broad_Pl_3_1529	K13	BRD-K36773541-001-01-9	4.465	3.226 to 6.180	0.718231	>10	0	0.0593729		0.281769	0.520776	0.754939	0.891002	1.02586	1.05905	1.00177	0.981869	0.935832	0.938963		0.403761	0.576564	0.765884	1.00749	0.995966	1.05973	0.940928	0.850206	0.972952	1.1839
Broad_Pl_3_1529	L13	Empty	>10	0	0.307698	>10	0	0.0705805		0.917009	0.855276	0.959295	0.949385	0.790841	0.916653	0.936994	0.692302	0.962342	0.859466		0.746775	0.990859	1.04415	0.972362	0.947261	1.01298	0.88994	0.897394	1.10668	1.06691
Broad_Pl_3_1529	M13	BRD-K58149752-001-01-9	>10	0	0.572986	>10	0	0.124339		0.427014	1.07734	1.22196	0.782153	1.00074	0.729933	0.891573	0.797894	0.908956	0.95067		0.59716	0.982158	0.923771	0.851154	0.920813	1.01336	0.895439	0.879773	0.844109	0.818992
Broad_Pl_3_1529	N13	Empty	>10	0	0.192934	>10	0	0.0834036		0.858611	0.807066	0.962176	1.14272	0.888462	0.999719	0.960496	1.02197	0.917732	1.07663		0.996489	0.849557	1.04533	0.991533	1.06376	0.967183	1.02439	1.03214	0.862455	1.02862
Broad_Pl_3_1529	O13	BRD-K11517247-019-02-6	>10	0	0.221305	>10	0	0.0486478		0.778695	0.871559	0.905205	1.06726	0.928247	0.98832	0.781845	0.975544	0.855559	1.00566		0.828312	0.932282	1.03365	1.08117	1.08289	0.986014	0.95504	0.868817	0.975766	0.978572
Broad_Pl_3_1529	P13	Empty	>10	0	0.131142	>10	0	0.0025833		0.976257	1.15588	0.868858	1.12235	1.01916	1.22274	1.07821	0.931798	1.0484	0.922089		0.986544	1.01477	0.996569	1.07548	1.05046	1.05533	0.969644	0.999379	1.10297	1.10615
Broad_Pl_4_2931	A03	BRD-K86826411-001-01-1	>10	0	0.33244	>10	0	0.128518		0.986716	1.05671	1.12927	1.15532	1.15062	1.20286	1.13039	1.07817	0.959311	0.837422		0.66756	1.15526	1.1227	0.949798	1.0489	0.988505	1.01148	1.01849	1.0576	0.904987
Broad_Pl_4_2931	B03	BRD-K86354270-001-02-2	2.279	1.607 to 3.233	0.934108	>10	0	0.142158		0.0658916	0.375538	0.752768	0.999276	0.940425	0.986903	0.736579	0.98841	0.973542	0.983215		0.0779522	0.310501	0.82811	0.866421	0.70554	0.909139	0.896517	1.15662	0.840519	1.02284
Broad_Pl_4_2931	C03	BRD-K70940716-001-01-0	>10	0	0.212057	>10	0	0.07154		1.17599	1.13606	0.929579	0.850632	0.951419	0.831028	0.891252	0.871007	0.847101	0.787943		1.09555	1.1649	1.00467	1.20074	0.979193	1.13887	1.07478	0.827684	0.992435	1.05835
Broad_Pl_4_2931	D03	BRD-K80648041-001-01-3	1.043	0.01985 to 54.75	0.916401	>10	0	0.111691		1.13479	0.10847	0.206813	0.397006	0.565058	0.622388	0.625922	0.843978	0.786612	0.889352		1.05304	0.0835992	0.138174	0.361963	0.461435	0.775648	0.724924	0.957001	1.09631	0.794225
Broad_Pl_4_2931	E03	BRD-K10380905-001-01-3	8.738	(Very wide)	0.91387	>10	0	0.203711		0.147792	1.02889	1.04795	1.11518	0.992619	0.977987	0.935694	1.17839	0.946221	1.11389		0.0861296	1.1127	1.23487	0.946423	1.03472	1.08626	1.00759	1.03859	0.938131	0.909668
Broad_Pl_4_2931	F03	BRD-K95724677-019-01-8	0.5127	0.3759 to 0.6992	1.00725	3.724	3.370 to 4.114	0.934858		0.00318764	-0.00220689	0.0561713	0.777329	0.823972	0.859212	0.879501	0.866274	0.944479	0.969472		-0.0045641	-0.00725058	0.0258054	0.798342	1.12421	1.00091	0.984676	0.993337	0.816113	0.788376
Broad_Pl_4_2931	G03	BRD-K27989629-001-01-7	2.733	1.683 to 4.438	0.965777	>10	0	0.0522707		0.0604286	0.638173	0.646158	0.902961	0.984289	1.06316	1.00769	0.810923	0.868789	0.90971		0.0342226	0.602959	0.684756	0.76061	0.909086	0.88103	1.12837	1.01323	0.871113	1.21162
Broad_Pl_4_2931	H03	BRD-K26611181-001-01-8	1.28	1.057 to 1.550	0.984642	>10	0	0.327955		0.0153581	0.235123	0.582992	0.775198	0.860272	1.06299	0.995325	1.03738	0.911445	1.00441		0.0224987	0.250911	0.54781	0.832471	1.00263	0.950429	0.916319	0.939242	1.04298	0.911837
Broad_Pl_4_2931	I03	BRD-K56432748-001-01-8	3.414	2.281 to 5.108	0.824071	>10	0	0.0962879		0.181788	0.643452	0.735361	0.908319	0.930341	1.03598	0.958927	0.977391	0.888632	0.771491		0.175929	0.441545	0.793517	1.0762	0.954668	0.935281	0.740849	0.951453	0.874355	0.807273
Broad_Pl_4_2931	J03	BRD-K74949371-001-01-3	6.478	5.003 to 8.388	0.779474	>10	0	0.0638518		0.347717	0.854425	0.784067	1.00007	0.88859	0.988999	1.00555	1.13695	0.900403	0.938311		0.220526	0.791774	0.974075	0.831752	0.9864	0.98667	1.0552	1.04445	0.870482	0.899744
Broad_Pl_4_2931	K03	BRD-K73006286-001-01-7	5.984	4.350 to 8.232	0.926287	>10	0	0.153008		0.156324	0.868221	0.838426	0.861623	1.13818	1.02774	0.821617	0.905887	0.825636	1.05132		0.0737132	0.957534	0.967279	0.950133	0.954786	1.0708	1.12032	0.800405	0.920638	0.963942
Broad_Pl_4_2931	L03	BRD-K99496840-001-01-9	0.995	0.7786 to 1.271	0.98362	>10	0	0.0423396		0.0182072	0.11789	0.416533	0.883678	1.09932	1.10997	0.788395	1.13958	0.895089	0.945283		0.0163799	0.0843145	0.451542	0.862654	1.12765	0.935254	0.888743	0.929562	0.924341	1.08258
Broad_Pl_4_2931	M03	BRD-K69441790-001-01-1	4.36	3.066 to 6.199	0.831398	9.704	8.394 to 11.22	0.568733		0.168602	0.605868	0.920159	0.991982	0.874574	0.891999	0.954369	0.812355	1.04244	0.897146		0.18032	0.718181	0.742809	0.926944	0.848701	1.01012	1.00478	1.01373	0.751165	1.14268
Broad_Pl_4_2931	N03	BRD-K69197522-001-01-4	>10	0	0.348251	>10	0	0.0665429		0.651749	0.972762	0.913648	1.03361	0.746784	0.971833	0.904574	1.13514	0.968061	0.77028		0.673607	1.11677	0.870428	0.811329	1.06775	0.973539	0.911696	1.00921	0.898359	0.923686
Broad_Pl_4_2931	O03	BRD-K61788733-001-01-3	>10	0	0.238374	>10	0	0.0461605		1.04567	1.25641	1.09887	0.926983	0.956144	0.915447	0.945495	0.874106	0.878795	0.864091		1.07568	1.07112	0.993002	0.864789	0.770039	1.06592	0.761626	0.880387	0.992013	1.03018
Broad_Pl_4_2931	P03	BRD-K60334624-001-01-9	9.926	6.913 to 14.25	0.519152	>10	0	0.0453894		0.480848	0.846008	0.787201	1.09011	1.16108	1.05288	0.878456	1.00009	1.11479	0.765025		0.504225	0.971819	0.996967	1.10677	0.945456	0.987397	1.1233	0.890056	0.990917	1.17555
Broad_Pl_4_2931	A13	BRD-K85850546-001-01-0	>10	0	0.280352	>10	0	0.092475		0.977805	1.04072	1.05952	1.08324	0.719648	0.851665	0.938108	1.03906	1.0593	1.07469		1.10665	0.79386	0.92724	0.989083	0.841463	1.11741	1.09728	0.980418	0.805051	0.971701
Broad_Pl_4_2931	B13	BRD-K27035180-001-01-0	>10	0	0.439678	>10	0	0.0978831		0.826133	0.926182	1.04809	0.849128	0.986707	1.06797	0.928486	0.873728	1.11651	0.980086		0.560322	1.12134	0.836935	1.14302	0.868366	1.04499	0.863731	0.993501	1.06399	0.961312
Broad_Pl_4_2931	C13	BRD-K79512815-001-01-8	>10	0	0.397394	>10	0	0.0595963		0.602606	0.930201	0.940725	0.947543	0.814025	0.919406	1.1664	0.875657	0.892868	0.92001		0.8924	0.929539	0.877179	0.961579	0.788007	0.887369	0.903016	0.957252	1.02245	0.96726
Broad_Pl_4_2931	D13	BRD-K02315086-001-01-0	0.1535	0.1201 to 0.1961	1.00572	>10	0	0.10229		-0.00156383	0.00375329	0.0304967	0.17093	0.573739	0.703646	0.915551	0.809056	0.959323	1.07372		0.00594974	-0.00571708	0.0188799	0.276174	0.675281	0.920033	0.956609	0.914995	1.03688	0.998356
Broad_Pl_4_2931	E13	BRD-K00229958-001-01-0	0.3604	0.2649 to 0.4902	1.00292	>10	0	0.0723974		-0.00291842	0.0593003	0.23459	0.531417	0.758538	0.877497	0.94188	1.00547	0.806853	0.904663		0.00201133	0.0873816	0.303419	0.581992	0.679958	0.826345	0.78072	0.956974	1.04574	1.00923
Broad_Pl_4_2931	F13	BRD-K92545585-001-01-9	1.836	1.331 to 2.533	0.882702	>10	0	0.0464697		0.146699	0.402347	0.548276	0.764522	1.15816	0.987618	0.995802	1.06331	1.00422	1.0736		0.117298	0.460659	0.526965	0.846398	1.05724	0.975548	0.88778	1.04057	0.916	0.972351
Broad_Pl_4_2931	G13	BRD-K04089243-001-01-9	3.622	2.268 to 5.786	0.866358	>10	0	0.0228452		0.158155	0.748889	0.686399	0.819908	0.892978	0.864871	1.07176	0.9501	0.893121	0.875815		0.133642	0.655464	0.714079	0.846303	0.922438	0.890303	1.04113	1.02123	0.971176	0.875923
Broad_Pl_4_2931	H13	BRD-K28918058-001-01-5	0.03499	0.02673 to 0.04581	1.00963	>10	0	0.134389		-0.00149834	-0.00428789	0.0187966	0.102066	0.304302	0.527511	0.575948	0.783063	0.908227	0.87611		-0.00963266	-0.00158841	0.0183472	0.10597	0.341529	0.53566	0.693756	0.830017	0.802117	1.06947
Broad_Pl_4_2931	I13	BRD-K06421369-001-01-0	>10	0	0.175573	>10	0	0.0853656		0.994129	1.11812	0.824427	0.879432	1.01412	0.883541	0.875604	0.836708	1.04124	1.05469		0.830413	1.03219	1.10437	1.09436	1.03252	0.893168	0.945669	1.06921	1.00432	0.905166
Broad_Pl_4_2931	J13	BRD-K74656908-001-01-6	4.147	2.819 to 6.101	0.758073	>10	0	0.0595771		0.320509	0.607679	0.780845	0.785778	0.906682	0.982476	1.02355	1.02579	0.800333	1.00574		0.241927	0.563351	0.798776	0.837928	0.914995	0.972058	0.895882	0.979962	0.922895	1.16667
Broad_Pl_4_2931	K13	BRD-K68538844-001-01-1	2.769	1.967 to 3.898	0.977326	>10	0	0.353984		0.0414822	0.536118	0.670109	0.829539	0.845934	0.848045	1.07091	0.892627	0.913252	0.924452		0.0226737	0.562327	0.835732	0.882244	0.934718	0.935692	0.968325	1.03421	0.893423	1.08139
Broad_Pl_4_2931	L13	BRD-K43947390-001-01-2	0.3594	0.2926 to 0.4415	0.99647	>10	0	0.0533566		0.00353001	0.0985178	0.201258	0.494956	0.765677	0.833856	0.860093	0.983009	0.975456	1.06328		0.00891021	0.0819439	0.206911	0.458741	0.844385	0.987321	1.1048	0.938177	1.02318	1.06318
Broad_Pl_4_2931	M13	BRD-K28504277-001-01-8	0.8763	0.6588 to 1.166	1.00418	5.225	3.468 to 7.871	0.988336		0.00497093	0.183327	0.42946	0.788863	0.817235	1.12545	0.990979	0.932365	0.997216	1.07052		-0.00417596	0.150974	0.350387	0.786009	1.05588	1.05644	0.866673	0.795439	1.06972	1.10805
Broad_Pl_4_2931	N13	BRD-K48749217-001-01-8	0.5574	0.4172 to 0.7447	1.00259	>10	0	0.0553226		0.00819514	0.00084465	0.242184	0.758249	0.924949	1.01919	1.01909	0.91773	0.898394	1.34603		-0.00258538	-0.00258538	0.100875	0.680959	1.00419	1.1443	0.904576	0.992797	0.835843	0.897331
Broad_Pl_4_2931	O13	BRD-K97609851-001-01-5	3.893	3.147 to 4.816	1.00725	>10	0	0.393696		0.00959141	0.716754	0.803602	0.939198	0.928504	0.778508	0.974143	0.922866	0.947823	1.01239		-0.00725058	0.560245	0.896057	0.957926	0.918633	1.03083	0.96737	0.875702	1.11097	0.948904
Broad_Pl_4_2931	P13	BRD-K59130783-001-01-1	>10	0	0.48614	>10	0	0.0731247		0.748314	0.92514	0.912895	0.967367	1.0641	0.872311	0.950636	0.839509	0.814814	0.829331		0.51386	0.945974	0.804366	1.05082	0.904371	0.868396	0.981659	0.924139	0.948767	1.00723
Broad_Pl_5_2932	A03	BRD-K04605557-001-01-2	5.86	4.159 to 8.259	0.854599	>10	0	0.126497		0.151507	0.868729	1.06548	1.31863	1.11917	1.16463	1.21569	1.23812	1.03224	1.15234		0.145401	0.856613	0.959202	0.948941	0.986909	0.875878	0.928759	1.01488	0.991556	0.927771
Broad_Pl_5_2932	B03	BRD-K85670919-001-01-1	1.781	1.364 to 2.327	1.00785	>10	0	0.125413		0.00387877	0.277006	0.74576	1.05488	1.05552	1.00611	1.06259	1.21553	1.09903	1.05346		-0.00784997	0.228924	0.641936	0.884821	1.05891	1.02761	0.796733	1.13245	0.964267	0.917991
Broad_Pl_5_2932	C03	BRD-K78727929-001-08-1	0.4625	0.2960 to 0.7227	1.00635	8.469	(Very wide)	1.00192		-0.00467933	-0.00635129	0.0141191	0.789733	1.13058	1.16715	0.971289	1.03813	1.10995	0.976945		-0.00282235	-0.00579454	0.0118959	0.704318	0.848959	1.13443	1.02385	0.792538	1.02649	0.879165
Broad_Pl_5_2932	D03	BRD-K78692607-001-01-1	2.16	1.643 to 2.840	0.998809	>10	0	0.0974468		0.00119132	0.324857	0.684742	1.01241	1.07736	0.870179	1.0895	1.01312	0.73301	0.925644		0.018868	0.284669	0.8646	1.07864	0.934693	0.887363	1.09011	0.917444	0.95464	0.895336
Broad_Pl_5_2932	E03	BRD-K91191258-001-01-9	0.6402	0.4752 to 0.8625	0.994735	>10	0	0.093829		0.0141635	0.119924	0.403042	0.626463	0.739003	1.12458	1.06067	0.842015	1.04111	1.09465		0.00526464	0.150257	0.380733	0.611282	0.859289	1.06031	1.04493	1.06935	0.933229	1.08547
Broad_Pl_5_2932	F03	BRD-K38867404-001-01-3	3.445	2.805 to 4.231	0.947273	>10	0	0.038491		0.070993	0.554729	1.12561	1.07062	0.950911	1.06963	1.02919	0.953359	1.18403	0.976462		0.0527272	0.48291	0.804575	0.827573	0.92543	0.949575	0.939015	0.919761	0.903975	0.992034
Broad_Pl_5_2932	G03	BRD-K87117984-001-01-1	3.849	1.768 to 8.380	1.0075	9.788	9.054 to 10.58	0.573753		-0.0074967	0.790051	1.07138	1.09312	0.96028	1.02142	1.03107	1.31519	1.07001	1.16134		0.00826589	0.581917	0.876998	0.889056	0.86604	0.985064	1.02349	0.890507	0.876721	0.842024
Broad_Pl_5_2932	H03	BRD-K24711160-001-01-3	5.063	3.704 to 6.921	0.897879	>10	0	0.0291622		0.123925	0.856625	1.15426	1.13632	0.827111	0.929063	1.0442	0.820923	1.11769	1.29805		0.102121	0.702416	0.94626	0.959192	1.02522	0.922363	0.97944	1.03406	0.916456	0.876922
Broad_Pl_5_2932	I03	BRD-K16425675-019-01-0	4.233	3.328 to 5.383	0.964311	>10	0	0.0943668		0.0462795	0.637869	1.04299	0.987862	0.82904	1.08047	1.062	0.944986	1.14698	1.09307		0.0356893	0.746185	0.774639	0.921959	0.924767	0.84949	0.967923	1.01339	0.965144	0.900575
Broad_Pl_5_2932	J03	BRD-K38977317-001-01-6	>10	0	0.22957	>10	0	0.0617364		1.02884	0.933874	1.05855	0.892817	0.884053	0.979854	0.890591	1.01407	0.963087	1.13578		0.89317	0.997772	0.8955	1.00473	0.866055	1.03253	0.887347	0.77043	0.87029	0.82799
Broad_Pl_5_2932	K03	BRD-K72765192-019-01-4	>10	0	0.185386	>10	0	0.0561331		0.937197	1.09093	0.98754	1.08264	0.980812	0.965887	1.06284	0.922187	0.976681	0.924389		0.814614	0.873284	0.903838	1.01967	0.910997	0.915351	0.87215	1.02655	0.905346	0.819988
Broad_Pl_5_2932	L03	BRD-K15778794-001-01-7	>10	0	0.562776	>10	0	0.178984		0.437224	0.90557	1.10518	1.07513	0.899234	1.0917	1.18644	0.897108	1.17029	1.02514		0.679653	0.818326	1.04311	0.922514	0.825848	0.822897	0.911	0.912715	0.86717	0.982819
Broad_Pl_5_2932	M03	BRD-K67862512-001-01-7	6.28	4.648 to 8.485	0.86918	>10	0	0.229554		0.201936	0.950501	1.08225	0.948282	1.01976	0.894205	1.11003	0.8851	1.16991	1.06011		0.13082	0.846088	0.987463	0.976433	0.724611	0.974211	0.915415	0.860132	0.877141	0.862108
Broad_Pl_5_2932	N03	BRD-K67774729-001-02-1	3.093	1.982 to 4.829	0.73136	>10	0	0.244737		0.296594	0.510161	0.700224	0.829819	0.864503	0.837228	1.17288	1.02125	1.09549	1.00406		0.26864	0.392275	0.78597	0.833744	1.121	0.855289	0.842362	0.95144	0.884346	0.9285
Broad_Pl_5_2932	O03	BRD-K55569739-001-01-9	1.197	0.8858 to 1.618	0.995575	>10	0	0.0375122		0.0127617	0.371535	0.457711	0.808176	0.91445	1.10964	1.11417	0.882344	1.0091	1.05834		0.0044245	0.266091	0.471885	0.824365	0.958843	0.917653	0.856172	0.9365	0.925428	0.898086
Broad_Pl_5_2932	P03	BRD-K54628954-001-01-2	>10	0	0.245517	>10	0	0.0176219		0.911201	0.873998	0.978346	0.980111	0.956163	0.838777	0.876224	0.905447	0.935881	0.879417		1.01519	0.901751	0.912612	0.808651	0.955744	0.942833	0.959908	0.754483	0.880871	0.829198
Broad_Pl_5_2932	A13	BRD-K83953444-001-02-5	0.2627	0.2230 to 0.3094	1.00633	>10	0	0.550877		-0.00117814	0.00109217	0.01854	0.192728	0.980336	1.07776	1.00521	0.934212	1.1628	0.928752		-0.00632557	-0.00448942	0.0102949	0.241264	0.908609	0.910044	0.933401	0.991202	1.03948	1.00079
Broad_Pl_5_2932	B13	BRD-K10089781-004-02-1	0.08237	0.04990 to 0.1360	0.920417	>10	0	0.129727		0.0855243	0.138309	0.183045	0.228899	0.460563	0.598193	0.866079	1.10645	1.31842	1.12143		0.0795826	0.120958	0.149047	0.179134	0.340266	0.568171	0.715142	0.938994	1.00272	0.840085
Broad_Pl_5_2932	C13	BRD-K31367750-001-01-1	>10	0	0.148161	>10	0	0.0959389		1.05713	1.00532	0.957575	1.06389	1.10042	1.05391	1.05935	1.11469	1.07763	1.08159		0.956727	0.881101	0.851839	0.909983	0.974158	0.90448	0.874554	0.905782	0.941921	1.02046
Broad_Pl_5_2932	D13	BRD-K26887637-001-01-4	1.919	1.386 to 2.658	0.94815	>10	0	0.111604		0.0529297	0.277895	0.71587	1.17675	1.03249	1.02061	1.04192	1.16516	1.1529	0.771297		0.0518501	0.255462	0.712696	0.897463	0.864853	0.82161	0.963052	0.882446	0.862658	1.01835
Broad_Pl_5_2932	E13	BRD-K71730412-001-01-1	4.504	2.871 to 7.066	0.992268	>10	0	0.134448		0.0313515	0.868609	1.05896	1.21459	1.15296	1.0068	1.05468	1.1184	1.00955	0.988057		0.00773222	0.755601	0.909764	0.927275	0.829269	1.04836	1.0299	0.926033	1.14205	1.12791
Broad_Pl_5_2932	F13	BRD-K77264696-001-01-2	0.7301	0.5007 to 1.065	0.985741	>10	0	0.29998		0.0142593	0.270773	0.444499	0.585635	0.943564	0.929723	1.04151	1.12375	1.19979	1.01848		0.0221784	0.336768	0.316235	0.528658	0.900245	1.04077	1.0207	0.964476	0.996261	0.871368
Broad_Pl_5_2932	G13	BRD-K27191881-001-01-3	6.347	4.908 to 8.208	0.716681	>10	0	0.0349043		0.350514	0.776987	1.00527	0.934629	0.834801	1.07173	1.00388	1.09792	1.0593	1.16669		0.283319	0.730397	0.846241	1.00043	1.02544	0.917988	1.00819	0.935018	0.872222	1.01082
Broad_Pl_5_2932	H13	BRD-K92048968-001-01-1	2.106	1.319 to 3.364	0.941439	>10	0	0.0733016		0.0734821	0.352484	0.865378	0.723132	0.861672	1.17729	1.03172	0.915971	0.829081	1.04564		0.0585606	0.359108	0.711576	0.853844	0.882721	0.849144	0.74171	0.918654	0.739932	1.0194
Broad_Pl_5_2932	I13	BRD-K64741770-001-01-3	8.049	5.901 to 10.98	0.660825	>10	0	0.152591		0.414835	0.901218	1.09973	1.1794	0.98076	0.846063	0.770942	1.18114	1.07485	1.02602		0.339175	0.866074	0.888084	0.97549	0.833847	0.961847	0.826793	0.89765	0.847731	0.912709
Broad_Pl_5_2932	J13	BRD-K74392214-001-01-7	2.255	1.625 to 3.129	0.997656	>10	0	0.074419		0.00234357	0.260437	1.0424	1.09956	0.999118	1.28864	1.05776	1.0329	0.977451	0.960977		0.0117533	0.221569	0.743791	0.772005	0.955747	0.867635	0.892192	0.737712	0.949929	1.02236
Broad_Pl_5_2932	K13	BRD-K72492940-001-01-8	5.655	3.486 to 9.175	0.968041	>10	0	0.18385		0.0426005	0.978405	0.980781	1.04319	0.907478	1.06365	0.988611	0.96879	0.941382	1.12572		0.0319589	0.928273	0.860243	0.873004	0.931869	0.854312	0.892274	0.775611	0.804303	0.987955
Broad_Pl_5_2932	L13	BRD-K72210630-001-02-7	>10	0	0.230843	>10	0	0.0484574		1.04667	0.913458	0.918874	1.08586	0.875116	0.973187	0.821432	0.950101	0.798247	0.822971		0.802881	0.879255	0.839263	0.769157	1.00047	0.859284	1.03047	0.840251	0.902718	1.02934
Broad_Pl_5_2932	M13	BRD-K66184091-001-01-6	>10	0	0.209798	>10	0	0.0714667		1.24277	1.28178	1.00275	0.947499	0.975703	0.857736	0.850283	1.02981	1.05629	0.908952		0.91868	0.98372	0.824373	0.854267	0.934117	0.977218	0.790202	0.793164	0.928109	0.948661
Broad_Pl_5_2932	N13	BRD-M87740798-001-01-4	2.553	1.914 to 3.404	0.995544	8.579	7.645 to 9.628	0.583054		0.00553363	0.434334	0.889134	0.893634	1.0005	1.08807	0.847411	0.778983	0.873861	0.811369		0.00445621	0.360942	0.779841	0.896749	0.939335	0.893204	0.87005	0.943729	0.975297	1.0174
Broad_Pl_5_2932	O13	BRD-K54383078-001-01-5	1.297	0.9752 to 1.726	0.992601	>10	0	0.0548216		0.010888	0.0987837	0.601992	0.983328	1.11277	0.852238	0.861819	0.96602	0.979635	0.840955		0.00739933	0.130387	0.588762	0.79649	0.891661	0.966534	0.891077	0.90695	0.879476	0.768248
Broad_Pl_5_2932	P13	BRD-K53602519-001-01-6	0.06687	0.04627 to 0.09663	1.00284	>10	0	0.276293		0.00752015	0.0142866	-0.00283642	0.0136541	0.346411	0.76013	0.760735	0.883188	0.730421	0.997511		-0.000481589	0.00358965	0.00198335	-0.000869955	0.282714	0.739646	0.875228	0.777352	0.833623	0.871574
Broad_Pl_6_2933	A03	BRD-K82593502-019-01-3	4.21	2.986 to 5.937	0.939646	>10	0	0.128142		0.0603541	0.572239	0.806412	0.92702	0.727151	1.0606	0.986855	0.89944	1.00456	1.00844		0.145067	0.779932	0.793706	1.199	1.02911	0.936866	0.799012	0.842105	0.990193	1.00403
Broad_Pl_6_2933	B03	BRD-K81680265-001-01-4	1.037	0.4992 to 2.156	0.925408	>10	0	0.111076		0.0745923	0.193669	0.387403	0.613807	0.843888	0.945469	0.933328	0.973699	0.977889	1.03921		0.387888	0.45742	0.637099	0.517671	0.872818	0.790023	0.925186	0.780747	0.79802	0.705071
Broad_Pl_6_2933	C03	BRD-K78605373-001-01-5	0.1274	0.07907 to 0.2051	0.984331	>10	0	0.103289		0.0196924	0.0194895	0.029419	0.137183	0.48475	1.07643	0.8517	0.941959	1.16623	1.08348		0.0156689	0.0222429	0.0281056	0.0896985	0.645492	0.710859	0.585643	0.875434	0.76831	0.847382
Broad_Pl_6_2933	D03	BRD-K69357983-001-01-6	3.103	2.073 to 4.645	0.972766	>10	0	0.0919218		0.0272342	0.370649	0.845223	1.06046	0.941546	0.965271	0.888868	1.05977	1.13578	0.876656		0.109162	0.666476	0.754267	0.963053	0.741039	0.886849	0.815109	0.778447	0.860416	0.835875
Broad_Pl_6_2933	E03	BRD-K73703617-001-01-9	3.585	2.404 to 5.348	0.953989	>10	0	0.118867		0.0460111	0.543783	0.832159	1.16233	0.997964	1.16866	1.11262	0.920337	0.995769	1.03665		0.0692708	0.681769	0.736587	0.816445	1.04317	0.759396	1.06715	0.728573	1.0747	0.804261
Broad_Pl_6_2933	F03	BRD-K19633528-001-01-3	>10	0	0.577687	>10	0	0.16411		0.585574	1.3301	1.18297	1.17669	1.14052	1.12331	0.971811	0.950671	0.922154	1.00002		0.422313	0.951907	0.980842	1.08601	0.855608	1.15149	0.826002	1.04584	0.755793	0.833976
Broad_Pl_6_2933	G03	BRD-K76980944-001-01-4	0.3935	0.2559 to 0.6051	0.994032	>10	0	0.0597306		0.00596825	0.0910524	0.240871	0.480665	0.649592	0.778831	0.868725	0.924863	1.04176	0.991677		0.0342724	0.184793	0.349901	0.761128	0.758088	0.829697	0.878227	0.858488	0.81761	0.856882
Broad_Pl_6_2933	H03	BRD-K75961033-001-01-7	>10	0	0.44935	>10	0	0.057115		0.748884	0.932732	1.01379	0.997373	0.92492	0.973519	1.11702	0.967496	0.957066	1.06032		0.689215	0.55065	0.813543	0.950083	0.664818	0.826702	0.795025	0.699036	0.6896	0.809085
Broad_Pl_6_2933	I03	BRD-K29207675-001-01-5	1.675	1.376 to 2.040	0.986186	>10	0	0.116		0.0138145	0.0944953	0.79935	1.00371	0.974436	1.17871	0.94184	0.938729	0.913729	0.957786		0.0191394	0.149255	0.727237	1.00858	0.935592	0.860255	0.976041	0.890773	0.928347	0.8895
Broad_Pl_6_2933	J03	BRD-K19492647-001-01-0	2.448	1.754 to 3.415	0.995575	>10	0	0.0901497		0.0102228	0.243587	0.941948	1.00883	0.867947	1.14678	1.02159	0.959213	1.07558	0.908832		0.00442531	0.336781	0.890957	0.779399	0.802419	0.834716	0.860341	0.702587	0.801576	0.946216
Broad_Pl_6_2933	K03	BRD-K71274172-001-01-0	>10	0	0.328373	>10	0	0.0804045		1.12685	0.964222	1.03891	0.951854	1.08962	1.07807	0.908237	1.11205	1.02372	0.919949		0.866313	0.974366	0.69794	0.899343	1.00841	0.917081	0.671627	0.97432	0.945287	0.739834
Broad_Pl_6_2933	L03	BRD-K70760948-001-01-2	1.096	0.7964 to 1.508	0.992116	>10	0	0.0962067		0.00979667	0.031296	0.553019	1.02228	0.913012	0.951117	0.769396	0.90502	0.95272	0.858981		0.00788442	0.0385518	0.43853	0.865951	0.862114	0.941862	0.848541	0.696724	0.72064	0.762499
Broad_Pl_6_2933	M03	BRD-K65395967-019-01-2	4.463	1.366 to 14.59	0.994039	>10	0	0.276624		0.00596149	0.801978	0.994356	0.997616	1.03086	0.909542	0.774952	1.06388	1.0035	0.92745		0.00884242	0.915853	1.05446	0.730013	0.755977	0.966914	0.994036	0.941731	0.791256	0.887389
Broad_Pl_6_2933	N03	BRD-K64517877-001-01-9	>10	0	0.273119	>10	0	0.0918843		1.00482	0.993493	0.817403	0.912008	1.1239	0.951749	1.19662	0.892544	0.866604	0.807727		0.75507	0.726881	0.808202	0.775991	0.920201	0.912256	0.763394	0.783368	0.930372	1.00151
Broad_Pl_6_2933	O03	BRD-K35047119-001-01-1	1.847	1.245 to 2.739	0.997552	>10	0	0.0700731		0.0024476	0.300337	0.646105	1.03132	0.856083	0.833481	1.00966	0.979418	1.0974	0.838632		0.00449988	0.221047	0.8129	0.832714	0.860886	0.816537	0.75877	0.868286	0.811007	0.774586
Broad_Pl_6_2933	P03	BRD-K53180201-001-01-6	>10	0	0.206908	>10	0	0.0666725		1.18129	0.946298	1.00766	0.982722	0.999479	0.970279	0.937193	0.878083	1.02137	1.0312		1.12189	0.976918	0.868556	0.990978	1.03367	1.2503	0.87486	0.910501	0.950071	0.793092
Broad_Pl_6_2933	A13	BRD-K81164606-001-02-5	0.09335	0.06447 to 0.1352	1.00666	>10	0	0.428105		0.00204514	-0.00230749	-0.00176298	0.0125834	0.51575	0.846657	0.8049	1.06228	0.921342	0.94324		-0.00666336	-0.00445481	-0.00460396	0.0104945	0.415911	0.79989	0.700964	0.737299	0.819417	1.05975
Broad_Pl_6_2933	B13	BRD-K19560511-001-03-3	4.186	2.773 to 6.319	1.00135	>10	0	0.11862		0.00399655	0.79565	0.911612	0.848095	0.984362	0.891043	0.873152	1.03713	0.972684	0.972873		-0.00135136	0.652152	0.762763	0.787591	0.821281	0.828062	0.906124	0.791216	0.920569	0.843057
Broad_Pl_6_2933	C13	BRD-K77826636-001-01-1	2.705	0.7597 to 9.629	0.833675	>10	0	0.196066		0.166325	0.615914	0.879929	0.922654	1.01063	1.00008	0.92518	0.955405	0.974497	0.993859		0.172568	0.402745	0.587455	0.73244	0.610097	0.68863	0.59688	0.710922	0.873168	0.780735
Broad_Pl_6_2933	D13	BRD-K15104969-001-01-5	>10	0	0.444216	>10	0	0.14164		0.562712	0.743645	0.844101	0.904682	1.28014	0.993436	1.26651	0.891499	1.08636	0.969004		0.555784	1.00549	0.823593	0.807284	0.801083	0.826496	0.917419	0.836431	0.992137	0.792685
Broad_Pl_6_2933	E13	BRD-K12121340-001-01-2	0.1846	0.1102 to 0.3092	0.926065	>10	0	0.0906641		0.0974512	0.127568	0.214187	0.326047	0.480289	0.698438	0.982008	0.962802	1.15953	1.19048		0.0739346	0.137707	0.207853	0.319956	0.693414	0.836936	0.884222	0.646627	0.9288	0.836121
Broad_Pl_6_2933	F13	BRD-K48864121-001-01-0	0.06319	0.04762 to 0.08384	1.00294	9.681	8.311 to 11.28	0.537718		0.00308341	0.00306312	0.00904248	0.0455342	0.390146	0.648104	0.727716	0.911585	1.03323	1.21862		-0.00294037	-0.00257897	0.0137127	0.0342666	0.316124	0.659219	0.89523	0.913587	0.876013	0.89811
Broad_Pl_6_2933	G13	BRD-K03390828-001-01-5	>10	0	0.344286	>10	0	0.0656753		0.793533	1.16243	1.03216	0.95481	0.941441	0.853597	0.998894	0.880792	0.885476	0.937687		0.87474	0.871533	0.780546	0.655714	0.925032	0.93522	0.748972	0.757686	0.891502	0.668397
Broad_Pl_6_2933	H13	BRD-K75018854-001-01-2	>10	0	0.270319	>10	0	0.0832996		0.991687	1.00129	0.927842	0.943805	1.05266	1.1704	0.980818	1.1676	0.90218	1.05018		1.20493	1.02241	0.882627	0.817552	1.0322	0.823105	0.928984	0.862722	0.729681	0.861918
Broad_Pl_6_2933	I13	BRD-K73614094-001-01-0	6.196	4.415 to 8.695	0.76315	>10	0	0.11731		0.23685	0.808576	1.07827	0.910286	0.90312	0.967685	0.95178	1.08652	0.985738	1.2496		0.254342	0.816084	0.880855	0.840871	0.894588	0.807072	0.782015	0.793993	0.858591	0.937101
Broad_Pl_6_2933	J13	BRD-K18296007-001-01-0	5.919	2.488 to 14.08	0.765701	>10	0	0.142083		0.316598	0.789661	0.852698	0.907946	0.941289	1.22534	1.005	1.09087	0.866834	0.811343		0.234299	0.780013	0.699942	0.682922	0.784091	0.834682	0.817673	0.798088	1.07265	1.01164
Broad_Pl_6_2933	K13	BRD-K55353065-001-01-2	7.939	1.958 to 32.19	0.6348	>10	0	0.113042		0.415572	0.708797	0.750027	0.904317	1.07309	0.883474	0.934792	1.08371	0.92424	0.96314		0.3652	0.662213	0.590828	0.505251	0.754669	0.835645	0.862825	0.885255	0.82754	0.792868
Broad_Pl_6_2933	L13	BRD-K17686828-001-01-0	>10	0	0.431653	>10	0	0.086974		0.822158	0.902778	0.911815	0.795897	1.06671	0.901567	1.01128	0.982059	0.901412	1.03252		0.706304	0.841152	0.662443	0.668868	0.568347	0.763153	0.89363	0.942161	0.8307	0.854128
Broad_Pl_6_2933	M13	BRD-K40215908-001-01-2	3.689	2.916 to 4.668	0.993856	>10	0	0.344531		0.00614412	0.584925	0.960627	1.00768	0.877403	0.899856	0.873673	1.08931	1.04835	1.03586		0.0893256	0.568422	0.89632	0.898919	0.752506	0.96864	0.917173	0.827178	1.15168	0.961263
Broad_Pl_6_2933	N13	BRD-K63849586-001-01-9	2.246	1.211 to 4.166	0.974074	>10	0	0.131888		0.0782617	0.389439	0.940744	1.08204	0.907107	0.819541	0.846684	1.03604	0.911321	0.976918		0.0259257	0.428847	0.666969	0.547346	0.721139	0.905304	0.765362	0.826237	0.779531	0.938392
Broad_Pl_6_2933	O13	BRD-K01898236-001-01-5	0.05897	0.04131 to 0.08418	0.993986	>10	0	0.0877937		0.0117481	0.03273	0.0900209	0.164604	0.490297	0.726177	0.665565	0.739181	0.856242	0.927338		0.00601432	0.0359876	0.0754892	0.196065	0.481978	0.516294	0.629814	0.913777	0.871085	0.937663
Broad_Pl_6_2933	P13	BRD-K52609475-001-01-4	2.332	1.555 to 3.499	0.91878	>10	0	0.0596375		0.08741	0.452733	0.631965	0.896187	1.06943	0.897796	0.963532	0.866422	1.0057	0.835642		0.0812199	0.365252	0.812992	0.886425	1.16723	0.772372	0.757049	0.878772	0.827643	0.982448
